# Supplementary material for: Rotavirus VP3 targets MAVS for degradation to inhibit type III interferon expression in intestinal epithelial cells
Source: eLife. 2018 Nov 21;7:e39494. doi: 10.7554/eLife.39494 (PMC6289572; doi:10.7554/eLife.39494)
Supplement: Figure 3—source data 1. [file elife-39494-fig3-data1.xlsx]

## Sheet: Sheet1
Figure 3c
MAVS-RV protein IP counts
	RV proteins
Mock\MG132	VP4	VP2	NSP2	VP1	VP6	VP3	NSP3	NSP4	NSP1	VP7	NSP5	NSP6
830	219
681		364
314			258
184				217
190					160
27						141
140							102
62								7
37									54
36										18
15											10
4												3
