# Supplementary material for: Rotavirus VP3 targets MAVS for degradation to inhibit type III interferon expression in intestinal epithelial cells
Source: eLife. 2018 Nov 21;7:e39494. doi: 10.7554/eLife.39494 (PMC6289572; doi:10.7554/eLife.39494)
Supplement: Figure 5—source data 1. [file elife-39494-fig5-data1.xlsx]

## Sheet: Sheet1
Figure 5A
Viral Shedding in the fecal samples
Days post infection	RRV-WT																						RRV-MAVS-/-																						EW-WT
1	1.57376e+08	1.06153e+07	9.10175e+07	3.26724e+06	3.08687e+07	2.065e+07	4.10148e+07	1.1441e+08	2.065e+07	1.7462e+08	1.50965e+08												1.16814e+08	12061083574	4.87751e+07	7.45429e+06	131709	168179	2031137096	4.01707e+07															18840440	189344400	148941400	141805000	147124300
2	1058695439	805564	3.15594e+06	4.39586e+07	298515	4.24612e+07	4.67882e+07	1.00561e+06	1.2042e+06	94810	1.08992e+08	2.13783e+07	3.74806e+07	1.80009e+06	1.81019e+07	3.54588e+07	2.45572e+08	1.71255e+07	7.76047e+07	6.21668e+07			8829229969	2.8367e+08	5626694444	6418728862	7221445367	26396735571	16475925703	2793914013	6.48934e+06	20425331957	2269363353	13198367786	30321886728	6.82108e+06	3.47291e+07	27901825711	33878254043	1.26069e+08					6.25992e+07	6.79379e+08	28095898256
3	3.00647e+06	9.90442e+06	3.82681e+07	597940	5.33742e+07	5.6493e+06	91004	509824	772749	8.49223e+07	1191094286	7.71717e+06											1882027385	23790070145	4.38998e+08	3.74806e+07	5.44958e+07	2.90406e+06																	2643203717	2.16477e+08	3.23601e+08	2872461628	126438000000
4	3.88023e+07	1.62926e+08	3.85859e+06	4.30539e+07	2.40518e+07	2.15269e+07																	7.19076e+07	2088240132	1.52015e+08	1975595545	4034214014	4764377145	7322252988																3322542423	1096030253	8.42231e+08	1843295821	20144130376
5	1.71026e+08	3.67583e+06	1.2996e+06	7.93413e+06	2.07937e+07																		2.43875e+07	625155772	934513636	2.0198e+08																			547359	1321601858	5.36737e+08	7.59061e+08	12061083574
6	2.2724e+08	1.75087e+06	3.02334e+07																				7.45429e+06	6418728862	5587828027	3345652534	1150521242																		6.38292e+08	7.39292e+07	1.65421e+07	45959386042
7	1.54343e+07	6.6257e+06																					3.35909e+06																						524157	4.34113e+06	4.38998e+08
8	1.69646e+07	696459																					2.01122e+06																						2.88015e+07
9	100000																						124833																						100000	1.80009e+06	100000
10	100000																						100000																						100000
11	100000																						100000																						100000
12	100000																						100000																						100000
[truncated: 36 more columns]
