# Supplementary material for: Rotavirus VP3 targets MAVS for degradation to inhibit type III interferon expression in intestinal epithelial cells
Source: eLife. 2018 Nov 21;7:e39494. doi: 10.7554/eLife.39494 (PMC6289572; doi:10.7554/eLife.39494)
Supplement: Figure 5—source data 2. [file elife-39494-fig5-data2.xlsx]

## Sheet: Sheet1
Figure 5B
Viral Shedding in the fecal samples
Days post infection	RRV-MAVS-/-						RRV-WT						EW-MAVS-/-						EW-WT
3	0.959264	0.073812	0.812252	0.25	0.0371627	0.0206173	0.000166753	0.0033771	0.00176026	0.000568718	1.19718e-05	0.000181216	0.68718	0.19718	0.81216				0.568718	0.119718	0.181216
7	1.7896e-05	1.44357e-05	1.53649e-05	2.11351e-05	2.46168e-05	1.1807e-05	1.1351e-06	2.46168e-06	1.1807e-06				0.00103224	2.15792e-05	1.08646e-05	2.90722e-05	1.82721e-05	0.000152384	3.88965e-05	3.20348e-05	2.32889e-05	1.19718e-05	9.39289e-06	3.78835e-06
3	0.0859714	0.000183746	0.00110633				0.0017725	0.036906	0.000110016				0.000859714	1.83746e-07	0.000810633				0.000859714	1.83746e-05	0.000110633
7	4.85557e-05	9.38034e-05	8.81304e-05				8.5557e-06	9.38034e-06	8.81304e-06				0.000123774	7.20821e-05	8.22286e-05				7.6722e-05	6.06136e-05	8.57205e-05
3	0.00982042	0.000434005	0.00878952				0.257028	6.01949e-05	1.7896e-05				9.15938e-05	1.9048e-06	1.7167e-05				9.05986e-05	0.00010641	1.37336e-05
7	2.24956e-05	0.000109256	4.06025e-06				3.15938e-05	0.00019048	1.7167e-05				3.04833e-05	1.8004e-05	1.8624e-05				7.05591e-05	1.195e-05	0.000140858
