# Supplementary material for: Rotavirus VP3 targets MAVS for degradation to inhibit type III interferon expression in intestinal epithelial cells
Source: eLife. 2018 Nov 21;7:e39494. doi: 10.7554/eLife.39494 (PMC6289572; doi:10.7554/eLife.39494)
Supplement: Figure 5—source data 3. [file elife-39494-fig5-data3.xlsx]

## Sheet: Sheet1
Figure 5C
Viral Shedding in the fecal samples
RRV					EW
WT	Mavs-/-	Casp1-/-	Nlrp9b-/-	Il18-/-	WT	Mavs-/-
229.126	10057.6	8364.13	19295.8	111.43	4350.6	6382.92
168.211	7193.14	4960.32	11196.2	679.759	3178.85	3099.32
377.697	6155.74	7452.31	5614.52	292.141	3386.7	3429.87
664.199	4994.81	4199.47	27904.7	386.033	6116.59	2143.63
202.547	21972.6	4155.11	5138.26	429.012	5122.59	7683.08
86.1493	4719.79	8910.22	4429.13	424.842	9369.67	4787.94
338.395	18639.5	8198.43	12448.7	566.893	3152.11	22455.5
108.069	7491.42	11436.6	15613.7	368.513	3700.72	3415.42
394.085	4366.86	19448.2	26413		10090.5	3315.95
292.727	3054.28	3075.98	3220.83		3047.41	3086.26
315.315	3186.81	3243.71			3112.44
