# Supplementary material for: Rotavirus VP3 targets MAVS for degradation to inhibit type III interferon expression in intestinal epithelial cells
Source: eLife. 2018 Nov 21;7:e39494. doi: 10.7554/eLife.39494 (PMC6289572; doi:10.7554/eLife.39494)
Supplement: Supplementary file 1. — Units are colored in red based on the respective number of spectral counts. 12 rotaviral proteins are highlighted in yellow for easy identification. Column 1: Rank number based on the total number of spectral counts for all samples Column 2: Host (Chlorocebus genus) and viral proteins identified by mass spec Column 3: Raw spectral counts of uninfected MA104 sample Column 4: Raw spectral counts of RRV-infected MA104 sample Column 5: Raw spectral counts of RRV-infected, MG132-treated MA104 sample [file elife-39494-supp1.xlsx]

## Sheet: GLOBAL
Rank Number	Protein Name	Uninfected	RV infection	RV infection_MG132	CONTAMINANT	MAX	SUM
1	>tr|A0A0D9R924|A0A0D9R924_CHLSB Uncharacterized protein OS=Chlorocebus sabaeus GN=PLEC PE=4 SV=1	312	3057	3137	0	3137	6506
2	>sp|Q76N69|ACTB_CHLAE Actin- cytoplasmic 1 OS=Chlorocebus aethiops GN=ACTB PE=2 SV=1	165	618	989	0	989	1772
3	>tr|A0A0D9R6E6|A0A0D9R6E6_CHLSB Uncharacterized protein OS=Chlorocebus sabaeus GN=MYH9 PE=4 SV=1	94	900	497	0	900	1491
4	>VP4 (RRV-4- 776aa):	NaN	830	219	0	830	1049
5	>VP2 (RRV-2- 887aa):	NaN	681	364	0	681	1045
6	>tr|A0A0D9RN38|A0A0D9RN38_CHLSB Uncharacterized protein OS=Chlorocebus sabaeus GN=SPTBN1 PE=4 SV=1	NaN	531	556	0	556	1087
7	>tr|A0A0D9R4Y1|A0A0D9R4Y1_CHLSB Uncharacterized protein OS=Chlorocebus sabaeus GN=DSP PE=4 SV=1	118	489	207	0	489	814
8	>tr|A0A0D9RP68|A0A0D9RP68_CHLSB Uncharacterized protein OS=Chlorocebus sabaeus GN=SPTAN1 PE=4 SV=1	NaN	461	487	0	487	948
9	>tr|A0A0D9RKZ5|A0A0D9RKZ5_CHLSB Uncharacterized protein OS=Chlorocebus sabaeus GN=ACTN1 PE=4 SV=1	NaN	156	417	0	417	573
10	>tr|A0A0D9RGG4|A0A0D9RGG4_CHLSB Uncharacterized protein OS=Chlorocebus sabaeus GN=SF3B1 PE=4 SV=1	408	253	262	0	408	923
11	>tr|A0A0D9R2J6|A0A0D9R2J6_CHLSB Uncharacterized protein (Fragment) OS=Chlorocebus sabaeus GN=AHNAK PE=4 SV=1	14	87	356	0	356	457
12	>tr|A0A0D9RFZ0|A0A0D9RFZ0_CHLSB Uncharacterized protein OS=Chlorocebus sabaeus GN=U2SURP PE=4 SV=1	327	203	194	0	327	724
13	>NSP2 (RRV-8- 317aa):	NaN	314	258	0	314	572
14	>tr|A0A0D9S7U2|A0A0D9S7U2_CHLSB Uncharacterized protein OS=Chlorocebus sabaeus GN=SFPQ PE=4 SV=1	79	88	310	0	310	477
15	>tr|A0A0D9SC49|A0A0D9SC49_CHLSB Uncharacterized protein OS=Chlorocebus sabaeus PE=3 SV=1	6	75	307	0	307	388
16	>tr|A0A0D9RQR8|A0A0D9RQR8_CHLSB Uncharacterized protein OS=Chlorocebus sabaeus GN=PRKDC PE=4 SV=1	86	125	306	0	306	517
17	>tr|A0A0D9RG77|A0A0D9RG77_CHLSB Uncharacterized protein OS=Chlorocebus sabaeus GN=SYNPO PE=4 SV=1	NaN	116	299	0	299	415
18	>tr|A0A0D9RDH4|A0A0D9RDH4_CHLSB Uncharacterized protein OS=Chlorocebus sabaeus GN=MYH10 PE=4 SV=1	NaN	296	183	0	296	479
19	>tr|A0A0D9RMN8|A0A0D9RMN8_CHLSB Uncharacterized protein OS=Chlorocebus sabaeus GN=PPM1F PE=3 SV=1	263	234	167	0	263	664
20	>tr|A0A0D9QWH4|A0A0D9QWH4_CHLSB Uncharacterized protein OS=Chlorocebus sabaeus GN=SF3B3 PE=4 SV=1	256	255	149	0	256	660
21	>tr|A0A0D9RC89|A0A0D9RC89_CHLSB Uncharacterized protein OS=Chlorocebus sabaeus GN=FLNC PE=4 SV=1	11	164	249	0	249	424
22	>tr|A0A0D9R093|A0A0D9R093_CHLSB Uncharacterized protein OS=Chlorocebus sabaeus GN=CHERP PE=4 SV=1	220	122	111	0	220	453
23	>VP1 (RRV-1- 1088aa):	NaN	184	217	0	217	401
24	>tr|A0A0D9S5L7|A0A0D9S5L7_CHLSB Protein tweety homolog OS=Chlorocebus sabaeus GN=TTYH1 PE=3 SV=1	215	193	159	0	215	567
25	>tr|A0A0D9RGZ2|A0A0D9RGZ2_CHLSB Uncharacterized protein OS=Chlorocebus sabaeus GN=SVIL PE=4 SV=1	NaN	166	212	0	212	378
26	>tr|A0A0D9R612|A0A0D9R612_CHLSB Uncharacterized protein OS=Chlorocebus sabaeus GN=SPECC1 PE=4 SV=1	NaN	NaN	205	0	205	205
27	>VP6 (RRV-6- 397aa):	NaN	197	160	0	197	357
28	>tr|A0A0D9S2F0|A0A0D9S2F0_CHLSB Uncharacterized protein OS=Chlorocebus sabaeus GN=KRT14 PE=3 SV=1	188	148	165	0	188	501
29	>tr|A0A0D9RHW7|A0A0D9RHW7_CHLSB Polyadenylate-binding protein OS=Chlorocebus sabaeus GN=PABPC1 PE=3 SV=1	101	74	182	0	182	357
30	>tr|A0A0D9RZL6|A0A0D9RZL6_CHLSB Uncharacterized protein OS=Chlorocebus sabaeus GN=SPATA13 PE=4 SV=1	166	133	170	0	170	469
31	>tr|A0A0D9QVJ0|A0A0D9QVJ0_CHLSB Uncharacterized protein OS=Chlorocebus sabaeus GN=ACTN4 PE=4 SV=1	NaN	67	169	0	169	236
32	>tr|A0A0D9R1G2|A0A0D9R1G2_CHLSB Uncharacterized protein OS=Chlorocebus sabaeus GN=TUBA1C PE=3 SV=1	111	168	165	0	168	444
33	>tr|A0A0D9RVM1|A0A0D9RVM1_CHLSB Uncharacterized protein OS=Chlorocebus sabaeus GN=DHX15 PE=4 SV=1	165	92	88	0	165	345
34	>tr|A0A0D9R055|A0A0D9R055_CHLSB Uncharacterized protein OS=Chlorocebus sabaeus GN=KRT5 PE=3 SV=1	104	161	103	0	161	368
35	>tr|A0A0D9RG28|A0A0D9RG28_CHLSB Uncharacterized protein (Fragment) OS=Chlorocebus sabaeus PE=4 SV=1	9	13	161	0	161	183
36	>tr|A0A0D9QZ56|A0A0D9QZ56_CHLSB Uncharacterized protein OS=Chlorocebus sabaeus GN=UBA52 PE=4 SV=1	NaN	39	159	0	159	198
37	>tr|A0A0D9R7E7|A0A0D9R7E7_CHLSB Uncharacterized protein OS=Chlorocebus sabaeus GN=TUBB PE=3 SV=1	86	155	129	0	155	370
38	>tr|A0A0D9QVW2|A0A0D9QVW2_CHLSB Uncharacterized protein OS=Chlorocebus sabaeus GN=SIPA1L3 PE=4 SV=1	NaN	NaN	155	0	155	155
39	>tr|A0A0D9RJC5|A0A0D9RJC5_CHLSB Uncharacterized protein OS=Chlorocebus sabaeus GN=AKAP9 PE=4 SV=1	154	105	85	0	154	344
40	>tr|A0A0D9R6Z5|A0A0D9R6Z5_CHLSB Uncharacterized protein OS=Chlorocebus sabaeus GN=SF3B2 PE=4 SV=1	146	69	110	0	146	325
41	>tr|A0A0D9RI00|A0A0D9RI00_CHLSB Uncharacterized protein OS=Chlorocebus sabaeus GN=MYO1B PE=4 SV=1	NaN	53	142	0	142	195
42	>tr|A0A0D9RWY7|A0A0D9RWY7_CHLSB Uncharacterized protein OS=Chlorocebus sabaeus GN=LIMCH1 PE=4 SV=1	NaN	142	22	0	142	164
43	>VP3 (RRV-3- 835aa):	NaN	27	141	0	141	168
44	>NSP3 (RRV-7- 313aa):	NaN	140	102	0	140	242
45	>tr|A0A0D9R370|A0A0D9R370_CHLSB Uncharacterized protein OS=Chlorocebus sabaeus GN=FLNA PE=4 SV=1	20	93	137	0	137	250
46	>tr|A0A0D9RS12|A0A0D9RS12_CHLSB Uncharacterized protein OS=Chlorocebus sabaeus GN=SHROOM2 PE=4 SV=1	NaN	12	137	0	137	149
47	>tr|A0A0D9SDL6|A0A0D9SDL6_CHLSB Uncharacterized protein OS=Chlorocebus sabaeus GN=RPS17 PE=3 SV=1	98	89	136	0	136	323
48	>tr|A0A0D9RIZ4|A0A0D9RIZ4_CHLSB Uncharacterized protein OS=Chlorocebus sabaeus GN=KIAA1217 PE=4 SV=1	136	96	65	0	136	297
49	>tr|A0A0D9RYD3|A0A0D9RYD3_CHLSB Uncharacterized protein OS=Chlorocebus sabaeus GN=LMO7 PE=4 SV=1	NaN	114	135	0	135	249
50	>tr|A0A0D9R0N5|A0A0D9R0N5_CHLSB Clathrin heavy chain OS=Chlorocebus sabaeus GN=CLTC PE=3 SV=1	65	79	133	0	133	277
51	>tr|A0A0D9R0H0|A0A0D9R0H0_CHLSB Uncharacterized protein OS=Chlorocebus sabaeus GN=KRT7 PE=3 SV=1	NaN	24	132	0	132	156
52	>tr|A0A0D9RMM1|A0A0D9RMM1_CHLSB Uncharacterized protein OS=Chlorocebus sabaeus GN=EIF4G1 PE=4 SV=1	20	61	129	0	129	210
53	>tr|A0A0D9S4Z6|A0A0D9S4Z6_CHLSB Uncharacterized protein OS=Chlorocebus sabaeus GN=LMNA PE=3 SV=1	NaN	NaN	127	0	127	127
54	>sp|P84198|VIME_CHLAE Vimentin OS=Chlorocebus aethiops GN=VIM PE=1 SV=3	NaN	96	125	0	125	221
55	>tr|A0A0D9R642|A0A0D9R642_CHLSB Hexokinase OS=Chlorocebus sabaeus GN=HKDC1 PE=3 SV=1	7	44	125	0	125	176
56	>tr|A0A0D9RJZ5|A0A0D9RJZ5_CHLSB Uncharacterized protein OS=Chlorocebus sabaeus GN=PTBP1 PE=4 SV=1	90	41	124	0	124	255
57	>tr|A0A0D9R1V9|A0A0D9R1V9_CHLSB Uncharacterized protein OS=Chlorocebus sabaeus GN=ATXN2L PE=4 SV=1	NaN	NaN	124	0	124	124
58	>tr|A0A0D9R221|A0A0D9R221_CHLSB Uncharacterized protein OS=Chlorocebus sabaeus GN=MYO1D PE=4 SV=1	NaN	34	123	0	123	157
59	>tr|A0A0D9RNK4|A0A0D9RNK4_CHLSB Uncharacterized protein OS=Chlorocebus sabaeus GN=MYO1C PE=4 SV=1	NaN	38	120	0	120	158
60	>tr|A0A0D9S0X3|A0A0D9S0X3_CHLSB Uncharacterized protein OS=Chlorocebus sabaeus GN=TMPO PE=4 SV=1	NaN	NaN	116	0	116	116
61	>tr|A0A0D9S3L7|A0A0D9S3L7_CHLSB Uncharacterized protein OS=Chlorocebus sabaeus GN=ATXN2 PE=4 SV=1	114	51	109	0	114	274
62	>tr|A0A0D9SD81|A0A0D9SD81_CHLSB Uncharacterized protein OS=Chlorocebus sabaeus GN=HSPA1B PE=3 SV=1	8	NaN	114	0	114	122
63	>tr|A0A0D9R058|A0A0D9R058_CHLSB Uncharacterized protein OS=Chlorocebus sabaeus PE=3 SV=1	113	44	86	0	113	243
64	>tr|A0A0D9S2K1|A0A0D9S2K1_CHLSB Uncharacterized protein OS=Chlorocebus sabaeus GN=SORBS2 PE=4 SV=1	NaN	67	111	0	111	178
65	>tr|A0A0D9RJV9|A0A0D9RJV9_CHLSB Uncharacterized protein (Fragment) OS=Chlorocebus sabaeus GN=EZR PE=4 SV=1	36	50	110	0	110	196
66	>tr|A0A0D9RM61|A0A0D9RM61_CHLSB Uncharacterized protein OS=Chlorocebus sabaeus GN=RBM17 PE=4 SV=1	108	95	71	0	108	274
67	>tr|A0A0D9RKI7|A0A0D9RKI7_CHLSB Uncharacterized protein OS=Chlorocebus sabaeus GN=MAVS PE=4 SV=1	108	78	78	0	108	264
68	>tr|A0A0D9RBE4|A0A0D9RBE4_CHLSB Uncharacterized protein OS=Chlorocebus sabaeus GN=CAD PE=3 SV=1	108	37	46	0	108	191
69	>tr|A0A0D9RJE1|A0A0D9RJE1_CHLSB Uncharacterized protein OS=Chlorocebus sabaeus GN=DHX9 PE=4 SV=1	32	76	106	0	106	214
70	>tr|A0A0D9R350|A0A0D9R350_CHLSB Uncharacterized protein OS=Chlorocebus sabaeus GN=TJP1 PE=4 SV=1	NaN	44	105	0	105	149
71	>tr|A0A0D9R3U8|A0A0D9R3U8_CHLSB Uncharacterized protein OS=Chlorocebus sabaeus GN=NUFIP2 PE=4 SV=1	NaN	NaN	105	0	105	105
72	>tr|A0A0D9RR62|A0A0D9RR62_CHLSB Uncharacterized protein OS=Chlorocebus sabaeus GN=MOSPD2 PE=4 SV=1	NaN	95	104	0	104	199
73	>tr|A0A0D9RD14|A0A0D9RD14_CHLSB Uncharacterized protein OS=Chlorocebus sabaeus GN=DYNC1H1 PE=4 SV=1	NaN	63	103	0	103	166
74	>tr|A0A0D9S7P7|A0A0D9S7P7_CHLSB Uncharacterized protein OS=Chlorocebus sabaeus GN=MACF1 PE=4 SV=1	NaN	25	99	0	99	124
75	>tr|A0A0D9RZP1|A0A0D9RZP1_CHLSB Uncharacterized protein OS=Chlorocebus sabaeus GN=MYO5B PE=4 SV=1	NaN	21	99	0	99	120
76	>tr|A0A0D9RKW3|A0A0D9RKW3_CHLSB Uncharacterized protein OS=Chlorocebus sabaeus PE=4 SV=1	NaN	NaN	98	0	98	98
77	>tr|A0A0D9S8U9|A0A0D9S8U9_CHLSB Uncharacterized protein OS=Chlorocebus sabaeus GN=TTC34 PE=4 SV=1	NaN	NaN	97	0	97	97
78	>tr|A0A0D9QVC9|A0A0D9QVC9_CHLSB Protein phosphatase 1 regulatory subunit OS=Chlorocebus sabaeus GN=PPP1R12A PE=4 SV=1	NaN	NaN	94	0	94	94
79	>tr|A0A0D9RIF8|A0A0D9RIF8_CHLSB Uncharacterized protein OS=Chlorocebus sabaeus GN=FLNB PE=4 SV=1	92	62	55	0	92	209
80	>tr|A0A0D9R5M1|A0A0D9R5M1_CHLSB Uncharacterized protein OS=Chlorocebus sabaeus GN=CCAR1 PE=4 SV=1	61	2	92	0	92	155
81	>tr|A0A0D9R480|A0A0D9R480_CHLSB Uncharacterized protein OS=Chlorocebus sabaeus GN=ACTC1 PE=3 SV=1	6	90	83	0	90	179
82	>tr|A0A0D9S4U3|A0A0D9S4U3_CHLSB Uncharacterized protein OS=Chlorocebus sabaeus GN=FASN PE=4 SV=1	35	56	89	0	89	180
83	>tr|A0A0D9REI2|A0A0D9REI2_CHLSB Uncharacterized protein OS=Chlorocebus sabaeus GN=LARP1 PE=4 SV=1	29	NaN	88	0	88	117
84	>tr|A0A0D9S4D0|A0A0D9S4D0_CHLSB Uncharacterized protein OS=Chlorocebus sabaeus GN=RNF213 PE=4 SV=1	NaN	NaN	88	0	88	88
85	>tr|A0A0D9S2W6|A0A0D9S2W6_CHLSB Uncharacterized protein OS=Chlorocebus sabaeus GN=KRT20 PE=3 SV=1	NaN	NaN	87	0	87	87
86	>tr|A0A0D9R0F3|A0A0D9R0F3_CHLSB Uncharacterized protein OS=Chlorocebus sabaeus GN=XRCC6 PE=4 SV=1	NaN	NaN	83	0	83	83
87	>tr|A0A0D9REQ6|A0A0D9REQ6_CHLSB Uncharacterized protein OS=Chlorocebus sabaeus GN=G3BP1 PE=4 SV=1	10	NaN	81	0	81	91
88	>tr|A0A0D9SEF9|A0A0D9SEF9_CHLSB Uncharacterized protein OS=Chlorocebus sabaeus PE=3 SV=1	66	38	78	0	78	182
89	>tr|A0A0D9RAT5|A0A0D9RAT5_CHLSB Uncharacterized protein OS=Chlorocebus sabaeus GN=SF3A1 PE=4 SV=1	78	55	19	0	78	152
90	>tr|A0A0D9QV93|A0A0D9QV93_CHLSB Uncharacterized protein OS=Chlorocebus sabaeus GN=RPS3 PE=3 SV=1	20	35	76	0	76	131
91	>tr|A0A0D9RDR4|A0A0D9RDR4_CHLSB Glyceraldehyde-3-phosphate dehydrogenase OS=Chlorocebus sabaeus PE=3 SV=1	15	23	75	0	75	113
92	>tr|A0A0D9RQS8|A0A0D9RQS8_CHLSB Uncharacterized protein OS=Chlorocebus sabaeus GN=VCAN PE=4 SV=1	34	54	74	0	74	162
93	>tr|A0A0D9S2T3|A0A0D9S2T3_CHLSB Coronin OS=Chlorocebus sabaeus GN=CORO1C PE=3 SV=1	NaN	64	74	0	74	138
94	>tr|A0A0D9SCL8|A0A0D9SCL8_CHLSB Histone H2B OS=Chlorocebus sabaeus GN=HIST1H2BB PE=3 SV=1	NaN	NaN	74	0	74	74
95	>tr|A0A0D9S2E8|A0A0D9S2E8_CHLSB Uncharacterized protein OS=Chlorocebus sabaeus GN=KRT16 PE=3 SV=1	72	47	49	0	72	168
96	>tr|A0A0D9RK50|A0A0D9RK50_CHLSB Uncharacterized protein OS=Chlorocebus sabaeus GN=PPP1R9A PE=4 SV=1	NaN	18	72	0	72	90
97	>tr|A0A0D9S441|A0A0D9S441_CHLSB Uncharacterized protein OS=Chlorocebus sabaeus GN=HSPA8 PE=3 SV=1	71	45	58	0	71	174
98	>tr|A0A0D9RL59|A0A0D9RL59_CHLSB Uncharacterized protein OS=Chlorocebus sabaeus GN=FXR1 PE=4 SV=1	38	7	71	0	71	116
99	>tr|A0A0D9S1G6|A0A0D9S1G6_CHLSB 40S ribosomal protein S3a OS=Chlorocebus sabaeus GN=RPS3A PE=3 SV=1	8	8	71	0	71	87
100	>tr|A0A0D9RIR5|A0A0D9RIR5_CHLSB Uncharacterized protein OS=Chlorocebus sabaeus GN=LACTB PE=4 SV=1	2	NaN	71	0	71	73
101	>tr|A0A0D9QW70|A0A0D9QW70_CHLSB Uncharacterized protein OS=Chlorocebus sabaeus GN=TRIM21 PE=4 SV=1	70	45	35	0	70	150
102	>tr|A0A0D9R8U2|A0A0D9R8U2_CHLSB Uncharacterized protein OS=Chlorocebus sabaeus GN=DBN1 PE=4 SV=1	NaN	58	68	0	68	126
103	>tr|A0A0D9QYB1|A0A0D9QYB1_CHLSB ATP synthase subunit beta OS=Chlorocebus sabaeus GN=ATP5B PE=3 SV=1	68	19	35	0	68	122
104	>tr|A0A0D9R6A2|A0A0D9R6A2_CHLSB Uncharacterized protein OS=Chlorocebus sabaeus GN=DDX1 PE=4 SV=1	NaN	NaN	67	0	67	67
105	>tr|A0A0D9S3N9|A0A0D9S3N9_CHLSB Uncharacterized protein OS=Chlorocebus sabaeus GN=DDX6 PE=3 SV=1	30	18	66	0	66	114
106	>tr|A0A0D9RG49|A0A0D9RG49_CHLSB Uncharacterized protein OS=Chlorocebus sabaeus GN=FXR2 PE=4 SV=1	17	NaN	63	0	63	80
107	>tr|A0A0D9QZ01|A0A0D9QZ01_CHLSB Uncharacterized protein OS=Chlorocebus sabaeus GN=UPF1 PE=4 SV=1	43	NaN	62	0	62	105
108	>tr|A0A0D9QZF1|A0A0D9QZF1_CHLSB Uncharacterized protein OS=Chlorocebus sabaeus GN=HNRNPA1 PE=4 SV=1	NaN	19	62	0	62	81
109	>NSP4 (RRV-10- 175aa):	NaN	62	7	0	62	69
110	>tr|A0A0D9SD09|A0A0D9SD09_CHLSB Histone H4 OS=Chlorocebus sabaeus PE=3 SV=1	61	29	53	0	61	143
111	>tr|A0A0D9RLP2|A0A0D9RLP2_CHLSB Uncharacterized protein OS=Chlorocebus sabaeus GN=DST PE=4 SV=1	NaN	38	61	0	61	99
112	>tr|A0A0D9RGD1|A0A0D9RGD1_CHLSB Uncharacterized protein OS=Chlorocebus sabaeus GN=EIF4A1 PE=3 SV=1	4	NaN	59	0	59	63
113	>tr|A0A0D9S0H6|A0A0D9S0H6_CHLSB Uncharacterized protein OS=Chlorocebus sabaeus GN=SLC25A5 PE=3 SV=1	NaN	6	58	0	58	64
114	>tr|A0A0D9RTG0|A0A0D9RTG0_CHLSB Uncharacterized protein OS=Chlorocebus sabaeus GN=SEC16A PE=4 SV=1	57	51	31	0	57	139
115	>tr|A0A0D9R3X3|A0A0D9R3X3_CHLSB Uncharacterized protein OS=Chlorocebus sabaeus GN=MYO18A PE=4 SV=1	NaN	57	13	0	57	70
116	>tr|A0A0D9R9Q4|A0A0D9R9Q4_CHLSB X-ray repair cross-complementing protein 5 OS=Chlorocebus sabaeus GN=XRCC5 PE=3 SV=1	NaN	NaN	57	0	57	57
117	>tr|A0A0D9RRV1|A0A0D9RRV1_CHLSB Inosine-5'-monophosphate dehydrogenase OS=Chlorocebus sabaeus GN=IMPDH2 PE=3 SV=1	NaN	NaN	57	0	57	57
118	>tr|A0A0D9R403|A0A0D9R403_CHLSB Uncharacterized protein OS=Chlorocebus sabaeus GN=FAM120A PE=4 SV=1	27	4	55	0	55	86
119	>tr|A0A0D9RWT9|A0A0D9RWT9_CHLSB Uncharacterized protein OS=Chlorocebus sabaeus GN=REPS1 PE=4 SV=1	54	31	28	0	54	113
120	>NSP1 (RRV-5- 501aa):	NaN	37	54	0	54	91
121	>tr|A0A0D9RUY0|A0A0D9RUY0_CHLSB Uncharacterized protein OS=Chlorocebus sabaeus GN=PARP1 PE=4 SV=1	9	NaN	53	0	53	62
122	>sp|Q76N24|RS4X_CHLAE 40S ribosomal protein S4- X isoform OS=Chlorocebus aethiops GN=RPS4X PE=2 SV=3	29	15	52	0	52	96
123	>tr|A0A0D9S316|A0A0D9S316_CHLSB DNA topoisomerase 2 OS=Chlorocebus sabaeus GN=TOP2A PE=3 SV=1	12	NaN	52	0	52	64
124	>tr|A0A0D9RMK2|A0A0D9RMK2_CHLSB Uncharacterized protein OS=Chlorocebus sabaeus GN=RBM10 PE=4 SV=1	51	8	37	0	51	96
125	>tr|A0A0D9R7T1|A0A0D9R7T1_CHLSB Uncharacterized protein OS=Chlorocebus sabaeus GN=HNRNPH1 PE=4 SV=1	2	NaN	51	0	51	53
126	>tr|A0A0D9RBE0|A0A0D9RBE0_CHLSB Uncharacterized protein OS=Chlorocebus sabaeus GN=LEMD2 PE=4 SV=1	NaN	NaN	51	0	51	51
127	>tr|A0A0D9RWI0|A0A0D9RWI0_CHLSB Uncharacterized protein OS=Chlorocebus sabaeus GN=RFC1 PE=4 SV=1	NaN	NaN	51	0	51	51
128	>tr|A0A0D9R0Y7|A0A0D9R0Y7_CHLSB Uncharacterized protein OS=Chlorocebus sabaeus GN=LIMA1 PE=4 SV=1	NaN	25	50	0	50	75
129	>tr|A0A0D9RZW6|A0A0D9RZW6_CHLSB Uncharacterized protein OS=Chlorocebus sabaeus GN=HSPB1 PE=3 SV=1	NaN	24	50	0	50	74
130	>tr|A0A0D9RMI5|A0A0D9RMI5_CHLSB Uncharacterized protein OS=Chlorocebus sabaeus GN=UACA PE=4 SV=1	49	9	12	0	49	70
131	>tr|A0A0D9QXL4|A0A0D9QXL4_CHLSB Eukaryotic translation initiation factor 3 subunit A OS=Chlorocebus sabaeus GN=EIF3A PE=3 SV=1	NaN	NaN	49	0	49	49
132	>tr|A0A0D9RZE8|A0A0D9RZE8_CHLSB ATP synthase subunit alpha OS=Chlorocebus sabaeus GN=ATP5A1 PE=3 SV=1	40	48	20	0	48	108
133	>tr|A0A0D9RS65|A0A0D9RS65_CHLSB Uncharacterized protein (Fragment) OS=Chlorocebus sabaeus PE=4 SV=1	NaN	12	48	0	48	60
134	>tr|A0A0D9QVI6|A0A0D9QVI6_CHLSB Uncharacterized protein OS=Chlorocebus sabaeus GN=DDX5 PE=3 SV=1	NaN	NaN	48	0	48	48
135	>tr|A0A0D9R1V5|A0A0D9R1V5_CHLSB Uncharacterized protein (Fragment) OS=Chlorocebus sabaeus GN=MYOF PE=4 SV=1	NaN	NaN	48	0	48	48
136	>tr|A0A0D9RA32|A0A0D9RA32_CHLSB Uncharacterized protein OS=Chlorocebus sabaeus GN=HNRNPU PE=4 SV=1	9	25	47	0	47	81
137	>tr|A0A0D9RKF0|A0A0D9RKF0_CHLSB Uncharacterized protein OS=Chlorocebus sabaeus GN=SIPA1L1 PE=4 SV=1	NaN	NaN	47	0	47	47
138	>tr|A0A0D9RRX9|A0A0D9RRX9_CHLSB Uncharacterized protein OS=Chlorocebus sabaeus GN=RPS29 PE=4 SV=1	36	29	46	0	46	111
139	>tr|A0A0D9S5K6|A0A0D9S5K6_CHLSB Uncharacterized protein OS=Chlorocebus sabaeus GN=SFSWAP PE=4 SV=1	38	5	46	0	46	89
140	>tr|A0A0D9RMB4|A0A0D9RMB4_CHLSB Uncharacterized protein OS=Chlorocebus sabaeus PE=3 SV=1	9	7	46	0	46	62
141	>tr|A0A0D9R723|A0A0D9R723_CHLSB ELAV-like protein OS=Chlorocebus sabaeus GN=ELAVL1 PE=3 SV=1	6	3	46	0	46	55
142	>tr|A0A0D9RNJ1|A0A0D9RNJ1_CHLSB Elongation factor 1-alpha OS=Chlorocebus sabaeus GN=EEF1A1 PE=3 SV=1	34	32	44	0	44	110
143	>tr|A0A0D9R541|A0A0D9R541_CHLSB Uncharacterized protein OS=Chlorocebus sabaeus GN=COL18A1 PE=4 SV=1	5	34	44	0	44	83
144	>tr|A0A0D9RTB5|A0A0D9RTB5_CHLSB Uncharacterized protein OS=Chlorocebus sabaeus GN=EPRS PE=3 SV=1	11	7	44	0	44	62
145	>tr|A0A0D9QV84|A0A0D9QV84_CHLSB Uncharacterized protein OS=Chlorocebus sabaeus GN=SERPINH1 PE=3 SV=1	NaN	15	44	0	44	59
146	>tr|A0A0D9S4H7|A0A0D9S4H7_CHLSB Uncharacterized protein OS=Chlorocebus sabaeus GN=RPLP0 PE=3 SV=1	12	3	44	0	44	59
147	>tr|A0A0D9RK88|A0A0D9RK88_CHLSB Uncharacterized protein OS=Chlorocebus sabaeus PE=4 SV=1	NaN	NaN	44	0	44	44
148	>tr|A0A0D9QZA0|A0A0D9QZA0_CHLSB Uncharacterized protein OS=Chlorocebus sabaeus GN=CAPRIN1 PE=4 SV=1	NaN	NaN	43	0	43	43
149	>tr|A0A0D9RZY7|A0A0D9RZY7_CHLSB Uncharacterized protein OS=Chlorocebus sabaeus GN=ALPK2 PE=4 SV=1	NaN	NaN	43	0	43	43
150	>tr|A0A0D9RAV0|A0A0D9RAV0_CHLSB Uncharacterized protein OS=Chlorocebus sabaeus GN=A2M PE=4 SV=1	42	27	22	0	42	91
151	>tr|A0A0D9S8D8|A0A0D9S8D8_CHLSB Uncharacterized protein OS=Chlorocebus sabaeus GN=CAPZB PE=4 SV=1	NaN	28	42	0	42	70
152	>tr|A0A0D9R6H5|A0A0D9R6H5_CHLSB Uncharacterized protein OS=Chlorocebus sabaeus PE=3 SV=1	11	29	41	0	41	81
153	>tr|A0A0D9RX70|A0A0D9RX70_CHLSB Uncharacterized protein OS=Chlorocebus sabaeus GN=TBC1D8 PE=4 SV=1	41	NaN	NaN	0	41	41
154	>tr|A0A0D9R6L1|A0A0D9R6L1_CHLSB Uncharacterized protein OS=Chlorocebus sabaeus GN=HNRNPM PE=4 SV=1	NaN	14	40	0	40	54
155	>tr|A0A0D9RSX6|A0A0D9RSX6_CHLSB Uncharacterized protein OS=Chlorocebus sabaeus GN=MAP1B PE=4 SV=1	8	NaN	40	0	40	48
156	>tr|A0A0D9S0E1|A0A0D9S0E1_CHLSB Uncharacterized protein OS=Chlorocebus sabaeus GN=DDX3Y PE=3 SV=1	NaN	3	40	0	40	43
157	>tr|A0A0D9R6X7|A0A0D9R6X7_CHLSB Single-stranded DNA-binding protein OS=Chlorocebus sabaeus GN=SSBP1 PE=3 SV=1	NaN	NaN	40	0	40	40
158	>tr|A0A0D9SBN8|A0A0D9SBN8_CHLSB Uncharacterized protein OS=Chlorocebus sabaeus GN=RPS9 PE=3 SV=1	23	27	39	0	39	89
159	>tr|A0A0D9S2D4|A0A0D9S2D4_CHLSB Uncharacterized protein OS=Chlorocebus sabaeus GN=JUP PE=4 SV=1	39	18	16	0	39	73
160	>tr|A0A0D9RI07|A0A0D9RI07_CHLSB Annexin OS=Chlorocebus sabaeus PE=3 SV=1	7	15	39	0	39	61
161	>tr|A0A0D9R627|A0A0D9R627_CHLSB Uncharacterized protein OS=Chlorocebus sabaeus GN=RPAP1 PE=4 SV=1	38	8	11	0	38	57
162	>tr|A0A0D9RNC9|A0A0D9RNC9_CHLSB Uncharacterized protein (Fragment) OS=Chlorocebus sabaeus GN=IGF2BP3 PE=4 SV=1	8	NaN	38	0	38	46
163	>tr|A0A0D9RAB6|A0A0D9RAB6_CHLSB 40S ribosomal protein S24 OS=Chlorocebus sabaeus GN=RPS24 PE=3 SV=1	14	8	37	0	37	59
164	>tr|A0A0D9R7L4|A0A0D9R7L4_CHLSB tRNA-splicing ligase RtcB homolog OS=Chlorocebus sabaeus GN=RTCB PE=3 SV=1	NaN	NaN	37	0	37	37
165	>tr|A0A0D9RE26|A0A0D9RE26_CHLSB Uncharacterized protein OS=Chlorocebus sabaeus GN=SPECC1L-ADORA2A PE=4 SV=1	NaN	NaN	37	0	37	37
166	>tr|A0A0D9RPE9|A0A0D9RPE9_CHLSB Uncharacterized protein OS=Chlorocebus sabaeus GN=HNRNPA3 PE=4 SV=1	NaN	NaN	37	0	37	37
167	>tr|A0A0D9RVE4|A0A0D9RVE4_CHLSB Uncharacterized protein OS=Chlorocebus sabaeus GN=OBSCN PE=4 SV=1	36	36	23	0	36	95
168	>tr|A0A0D9SB62|A0A0D9SB62_CHLSB Uncharacterized protein OS=Chlorocebus sabaeus GN=RPS25 PE=4 SV=1	18	19	36	0	36	73
169	>VP7 (RRV-9- 326aa):	NaN	36	18	0	36	54
170	>tr|A0A0D9RGT8|A0A0D9RGT8_CHLSB Uncharacterized protein (Fragment) OS=Chlorocebus sabaeus GN=PRRC2C PE=4 SV=1	NaN	NaN	36	0	36	36
171	>tr|A0A0D9R4K7|A0A0D9R4K7_CHLSB Uncharacterized protein OS=Chlorocebus sabaeus GN=FMR1 PE=4 SV=1	12	16	35	0	35	63
172	>tr|A0A0D9RRS4|A0A0D9RRS4_CHLSB Uncharacterized protein (Fragment) OS=Chlorocebus sabaeus GN=ARHGAP6 PE=4 SV=1	35	20	NaN	0	35	55
173	>tr|H6U5Q1|H6U5Q1_CHLAE Nucleolin OS=Chlorocebus aethiops PE=2 SV=1	13	6	35	0	35	54
174	>tr|A0A0D9RXR5|A0A0D9RXR5_CHLSB Uncharacterized protein OS=Chlorocebus sabaeus GN=SNRNP200 PE=4 SV=1	9	NaN	35	0	35	44
175	>tr|A0A0D9RNS4|A0A0D9RNS4_CHLSB Oxysterol-binding protein OS=Chlorocebus sabaeus GN=OSBPL3 PE=3 SV=1	35	NaN	NaN	0	35	35
176	>tr|A0A0D9QXJ7|A0A0D9QXJ7_CHLSB Uncharacterized protein OS=Chlorocebus sabaeus GN=PLEKHA7 PE=4 SV=1	NaN	NaN	34	0	34	34
177	>tr|A0A0D9QYV6|A0A0D9QYV6_CHLSB Uncharacterized protein OS=Chlorocebus sabaeus GN=PPP1R9B PE=4 SV=1	NaN	NaN	34	0	34	34
178	>tr|A0A0D9RZ20|A0A0D9RZ20_CHLSB Uncharacterized protein OS=Chlorocebus sabaeus GN=DSG1 PE=4 SV=1	32	33	6	0	33	71
179	>tr|A0A0D9RTU4|A0A0D9RTU4_CHLSB Microtubule-associated protein OS=Chlorocebus sabaeus GN=MAP4 PE=4 SV=1	25	NaN	33	0	33	58
180	>tr|A0A0D9QXG4|A0A0D9QXG4_CHLSB Uncharacterized protein OS=Chlorocebus sabaeus GN=CNOT1 PE=4 SV=1	14	NaN	33	0	33	47
181	>tr|A0A0D9R6W3|A0A0D9R6W3_CHLSB Uncharacterized protein OS=Chlorocebus sabaeus GN=BANF1 PE=4 SV=1	NaN	NaN	33	0	33	33
182	>tr|A0A0D9RZQ0|A0A0D9RZQ0_CHLSB Uncharacterized protein OS=Chlorocebus sabaeus GN=SLC25A6 PE=3 SV=1	19	32	12	0	32	63
183	>tr|A0A0D9S7K7|A0A0D9S7K7_CHLSB Uncharacterized protein (Fragment) OS=Chlorocebus sabaeus GN=YBX1 PE=4 SV=1	16	11	32	0	32	59
184	>tr|A0A0D9R0F2|A0A0D9R0F2_CHLSB Uncharacterized protein OS=Chlorocebus sabaeus GN=HDLBP PE=4 SV=1	NaN	11	32	0	32	43
185	>tr|A0A0D9RII9|A0A0D9RII9_CHLSB Uncharacterized protein (Fragment) OS=Chlorocebus sabaeus PE=3 SV=1	NaN	10	32	0	32	42
186	>tr|A0A0D9QXD5|A0A0D9QXD5_CHLSB Uncharacterized protein OS=Chlorocebus sabaeus GN=G3BP2 PE=4 SV=1	NaN	9	32	0	32	41
187	>tr|A0A0D9R1X9|A0A0D9R1X9_CHLSB DNA ligase OS=Chlorocebus sabaeus GN=LIG3 PE=3 SV=1	NaN	NaN	32	0	32	32
188	>tr|A0A0D9RN25|A0A0D9RN25_CHLSB Uncharacterized protein OS=Chlorocebus sabaeus GN=SYNE2 PE=4 SV=1	NaN	NaN	32	0	32	32
189	>tr|A0A0D9R3P2|A0A0D9R3P2_CHLSB Uncharacterized protein OS=Chlorocebus sabaeus GN=RPS7 PE=4 SV=1	16	17	31	0	31	64
190	>tr|A0A0D9SC26|A0A0D9SC26_CHLSB Uncharacterized protein OS=Chlorocebus sabaeus GN=RPL17 PE=3 SV=1	15	10	31	0	31	56
191	>tr|A0A0D9SAG1|A0A0D9SAG1_CHLSB Uncharacterized protein OS=Chlorocebus sabaeus GN=RPL23A PE=3 SV=1	21	NaN	31	0	31	52
192	>tr|A0A0D9QVD3|A0A0D9QVD3_CHLSB Uncharacterized protein OS=Chlorocebus sabaeus GN=EDC4 PE=4 SV=1	9	NaN	31	0	31	40
193	>tr|A0A0D9RIJ4|A0A0D9RIJ4_CHLSB Structural maintenance of chromosomes protein OS=Chlorocebus sabaeus GN=SMC4 PE=3 SV=1	6	3	31	0	31	40
194	>tr|A0A0D9RE27|A0A0D9RE27_CHLSB Serine/threonine-protein phosphatase OS=Chlorocebus sabaeus GN=PPP1CB PE=3 SV=1	NaN	NaN	31	0	31	31
195	>tr|A0A0D9S1Y8|A0A0D9S1Y8_CHLSB Ubiquitin carboxyl-terminal hydrolase (Fragment) OS=Chlorocebus sabaeus GN=USP10 PE=3 SV=1	NaN	NaN	31	0	31	31
196	>tr|A0A0D9S9I8|A0A0D9S9I8_CHLSB 60S ribosomal protein L13 OS=Chlorocebus sabaeus GN=RPL13 PE=3 SV=1	30	13	27	0	30	70
197	>tr|A0A0D9RN81|A0A0D9RN81_CHLSB Uncharacterized protein OS=Chlorocebus sabaeus GN=PRPF8 PE=4 SV=1	7	NaN	30	0	30	37
198	>tr|A0A0D9R5A7|A0A0D9R5A7_CHLSB Uncharacterized protein OS=Chlorocebus sabaeus PE=4 SV=1	NaN	NaN	30	0	30	30
199	>tr|A0A0D9SCH7|A0A0D9SCH7_CHLSB Uncharacterized protein OS=Chlorocebus sabaeus GN=RPL13A PE=3 SV=1	NaN	NaN	30	0	30	30
200	>tr|A0A0D9RMF3|A0A0D9RMF3_CHLSB Uncharacterized protein OS=Chlorocebus sabaeus GN=HSPA5 PE=3 SV=1	29	11	18	0	29	58
201	>tr|A0A0D9S1Z5|A0A0D9S1Z5_CHLSB Uncharacterized protein OS=Chlorocebus sabaeus GN=SNRPD2 PE=4 SV=1	12	29	13	0	29	54
202	>tr|Q0QXC0|Q0QXC0_CHLAE Supervillin isoform 1 (Fragment) OS=Chlorocebus aethiops GN=SVIL PE=2 SV=1	NaN	10	29	0	29	39
203	>tr|A0A0D9S0W9|A0A0D9S0W9_CHLSB Uncharacterized protein OS=Chlorocebus sabaeus GN=HNRNPUL1 PE=4 SV=1	9	NaN	29	0	29	38
204	>tr|A0A0D9QWP1|A0A0D9QWP1_CHLSB Uncharacterized protein OS=Chlorocebus sabaeus GN=MKI67 PE=4 SV=1	NaN	NaN	29	0	29	29
205	>tr|A0A0D9R0M1|A0A0D9R0M1_CHLSB Uncharacterized protein OS=Chlorocebus sabaeus GN=PRR11 PE=4 SV=1	NaN	NaN	29	0	29	29
206	>tr|A0A0D9RX79|A0A0D9RX79_CHLSB Uncharacterized protein OS=Chlorocebus sabaeus GN=MFGE8 PE=4 SV=1	NaN	NaN	29	0	29	29
207	>tr|A0A0D9S3T6|A0A0D9S3T6_CHLSB Uncharacterized protein OS=Chlorocebus sabaeus GN=RPS11 PE=3 SV=1	18	26	28	0	28	72
208	>tr|A0A0D9S7H2|A0A0D9S7H2_CHLSB 40S ribosomal protein S8 OS=Chlorocebus sabaeus GN=RPS8 PE=3 SV=1	9	6	28	0	28	43
209	>tr|A0A0D9RPI8|A0A0D9RPI8_CHLSB Uncharacterized protein OS=Chlorocebus sabaeus GN=RBM5 PE=4 SV=1	28	5	4	0	28	37
210	>tr|A0A0D9RL86|A0A0D9RL86_CHLSB Uncharacterized protein OS=Chlorocebus sabaeus GN=RPL4 PE=4 SV=1	6	2	28	0	28	36
211	>tr|A0A0D9QXK4|A0A0D9QXK4_CHLSB Uncharacterized protein OS=Chlorocebus sabaeus GN=PIK3C2A PE=4 SV=1	NaN	NaN	28	0	28	28
212	>tr|A0A0D9R4M0|A0A0D9R4M0_CHLSB Uncharacterized protein OS=Chlorocebus sabaeus GN=GOLGB1 PE=4 SV=1	NaN	28	NaN	0	28	28
213	>tr|A0A0D9RRD3|A0A0D9RRD3_CHLSB Uncharacterized protein OS=Chlorocebus sabaeus GN=C14orf166 PE=4 SV=1	NaN	NaN	28	0	28	28
214	>tr|A0A0D9S2A3|A0A0D9S2A3_CHLSB Uncharacterized protein OS=Chlorocebus sabaeus GN=CALM3 PE=4 SV=1	28	NaN	NaN	0	28	28
215	>tr|A0A0D9S0X5|A0A0D9S0X5_CHLSB Uncharacterized protein OS=Chlorocebus sabaeus GN=SLC25A3 PE=3 SV=1	7	27	19	0	27	53
216	>tr|A0A0D9RJ20|A0A0D9RJ20_CHLSB Uncharacterized protein OS=Chlorocebus sabaeus GN=HSP90AB1 PE=3 SV=1	9	14	27	0	27	50
217	>tr|A0A0D9RHQ0|A0A0D9RHQ0_CHLSB Uncharacterized protein OS=Chlorocebus sabaeus GN=MSN PE=4 SV=1	3	13	27	0	27	43
218	>tr|A0A0D9S125|A0A0D9S125_CHLSB Uncharacterized protein OS=Chlorocebus sabaeus GN=LSM12 PE=4 SV=1	8	8	27	0	27	43
219	>tr|A0A0D9RY97|A0A0D9RY97_CHLSB Uncharacterized protein OS=Chlorocebus sabaeus GN=RALBP1 PE=4 SV=1	27	13	NaN	0	27	40
220	>tr|A0A0D9R0Q0|A0A0D9R0Q0_CHLSB Protein-tyrosine-phosphatase OS=Chlorocebus sabaeus GN=PTPRJ PE=4 SV=1	NaN	27	NaN	0	27	27
221	>tr|A0A0D9RSS3|A0A0D9RSS3_CHLSB Uncharacterized protein OS=Chlorocebus sabaeus GN=GNAS PE=4 SV=1	NaN	NaN	27	0	27	27
222	>tr|A0A0D9R9L1|A0A0D9R9L1_CHLSB Uncharacterized protein OS=Chlorocebus sabaeus PE=4 SV=1	26	20	18	0	26	64
223	>tr|A0A0D9RGJ5|A0A0D9RGJ5_CHLSB Uncharacterized protein OS=Chlorocebus sabaeus GN=RPS14 PE=3 SV=1	14	13	26	0	26	53
224	>tr|A0A0D9SCL9|A0A0D9SCL9_CHLSB Histone H2A OS=Chlorocebus sabaeus GN=HIST1H2AE PE=3 SV=1	NaN	26	21	0	26	47
225	>tr|A0A0D9R4H1|A0A0D9R4H1_CHLSB Uncharacterized protein OS=Chlorocebus sabaeus GN=IARS PE=3 SV=1	8	NaN	26	0	26	34
226	>tr|A0A0D9RPC3|A0A0D9RPC3_CHLSB Uncharacterized protein OS=Chlorocebus sabaeus GN=GNAI2 PE=4 SV=1	NaN	8	26	0	26	34
227	>tr|A0A0D9SAV7|A0A0D9SAV7_CHLSB Uncharacterized protein OS=Chlorocebus sabaeus PE=4 SV=1	4	NaN	26	0	26	30
228	>tr|A0A0D9RIV1|A0A0D9RIV1_CHLSB Uncharacterized protein OS=Chlorocebus sabaeus GN=RPL30 PE=3 SV=1	1	NaN	26	0	26	27
229	>tr|A0A0D9R056|A0A0D9R056_CHLSB Uncharacterized protein OS=Chlorocebus sabaeus GN=CKAP5 PE=4 SV=1	NaN	NaN	26	0	26	26
230	>tr|A0A0D9RC78|A0A0D9RC78_CHLSB Ribosomal protein OS=Chlorocebus sabaeus GN=RPL10A PE=3 SV=1	NaN	NaN	26	0	26	26
231	>tr|A0A0D9QV09|A0A0D9QV09_CHLSB Uncharacterized protein OS=Chlorocebus sabaeus GN=RPS16 PE=3 SV=1	15	19	25	0	25	59
232	>tr|A0A0D9R9A4|A0A0D9R9A4_CHLSB Uncharacterized protein OS=Chlorocebus sabaeus GN=ARPC2 PE=4 SV=1	NaN	14	25	0	25	39
233	>tr|A0A0D9R2U6|A0A0D9R2U6_CHLSB Uncharacterized protein OS=Chlorocebus sabaeus GN=DDX17 PE=3 SV=1	9	NaN	25	0	25	34
234	>tr|A0A0D9S6E7|A0A0D9S6E7_CHLSB Uncharacterized protein (Fragment) OS=Chlorocebus sabaeus GN=CAPZA1 PE=4 SV=1	NaN	7	25	0	25	32
235	>tr|A0A0D9SBE5|A0A0D9SBE5_CHLSB Uncharacterized protein OS=Chlorocebus sabaeus GN=RPL3 PE=3 SV=1	5	2	25	0	25	32
236	>tr|A0A0D9SC74|A0A0D9SC74_CHLSB Uncharacterized protein OS=Chlorocebus sabaeus GN=DYNLL1 PE=4 SV=1	NaN	25	6	0	25	31
237	>tr|G4XXN2|G4XXN2_CHLAE Cytochrome c OS=Chlorocebus aethiops GN=CYCS PE=3 SV=1	2	NaN	25	0	25	27
238	>tr|A0A0D9R6N8|A0A0D9R6N8_CHLSB Uncharacterized protein OS=Chlorocebus sabaeus GN=GNB2L1 PE=4 SV=1	NaN	NaN	25	0	25	25
239	>tr|A0A0D9RMZ0|A0A0D9RMZ0_CHLSB Uncharacterized protein OS=Chlorocebus sabaeus GN=RPA1 PE=4 SV=1	NaN	NaN	25	0	25	25
240	>tr|A0A0D9S6R4|A0A0D9S6R4_CHLSB Uncharacterized protein OS=Chlorocebus sabaeus GN=RPL5 PE=4 SV=1	NaN	NaN	25	0	25	25
241	>tr|A0A0D9SCL5|A0A0D9SCL5_CHLSB Histone H2B OS=Chlorocebus sabaeus GN=HIST1H2BE PE=3 SV=1	20	24	4	0	24	48
242	>tr|A0A0D9S0W5|A0A0D9S0W5_CHLSB Uncharacterized protein OS=Chlorocebus sabaeus GN=NEDD1 PE=4 SV=1	18	2	24	0	24	44
243	>tr|A0A0D9S9G6|A0A0D9S9G6_CHLSB Uncharacterized protein OS=Chlorocebus sabaeus GN=HNRNPA0 PE=4 SV=1	5	13	24	0	24	42
244	>tr|A0A0D9RG34|A0A0D9RG34_CHLSB Uncharacterized protein OS=Chlorocebus sabaeus PE=4 SV=1	4	NaN	24	0	24	28
245	>tr|A0A0D9QVC3|A0A0D9QVC3_CHLSB Uncharacterized protein OS=Chlorocebus sabaeus GN=HNRNPL PE=4 SV=1	NaN	NaN	24	0	24	24
246	>tr|A0A0D9RXB8|A0A0D9RXB8_CHLSB Uncharacterized protein OS=Chlorocebus sabaeus PE=4 SV=1	NaN	NaN	24	0	24	24
247	>tr|A0A0D9S3N6|A0A0D9S3N6_CHLSB Uncharacterized protein OS=Chlorocebus sabaeus GN=PHLDB1 PE=4 SV=1	NaN	NaN	24	0	24	24
248	>tr|A0A0D9SB97|A0A0D9SB97_CHLSB 60S ribosomal protein L36 OS=Chlorocebus sabaeus GN=RPL36 PE=3 SV=1	NaN	NaN	24	0	24	24
249	>tr|A0A0D9QXK1|A0A0D9QXK1_CHLSB Uncharacterized protein OS=Chlorocebus sabaeus GN=RPS13 PE=3 SV=1	22	23	22	0	23	67
250	>tr|A0A0D9S6D9|A0A0D9S6D9_CHLSB Uncharacterized protein OS=Chlorocebus sabaeus GN=RPS5 PE=3 SV=1	11	16	23	0	23	50
251	>tr|A0A0D9R2A6|A0A0D9R2A6_CHLSB Uncharacterized protein OS=Chlorocebus sabaeus GN=MYRF PE=4 SV=1	23	6	13	0	23	42
252	>tr|A0A0D9S602|A0A0D9S602_CHLSB Uncharacterized protein OS=Chlorocebus sabaeus PE=4 SV=1	NaN	10	23	0	23	33
253	>tr|A0A0D9SBL4|A0A0D9SBL4_CHLSB Uncharacterized protein OS=Chlorocebus sabaeus PE=4 SV=1	4	3	23	0	23	30
254	>tr|A0A0D9R2K8|A0A0D9R2K8_CHLSB Uncharacterized protein OS=Chlorocebus sabaeus GN=PHLDB2 PE=4 SV=1	NaN	NaN	23	0	23	23
255	>tr|A0A0D9RBC2|A0A0D9RBC2_CHLSB Uncharacterized protein OS=Chlorocebus sabaeus GN=NIPSNAP1 PE=4 SV=1	NaN	23	NaN	0	23	23
256	>tr|A0A0D9RM68|A0A0D9RM68_CHLSB Uncharacterized protein OS=Chlorocebus sabaeus GN=SYNE1 PE=4 SV=1	NaN	NaN	23	0	23	23
257	>tr|A0A0D9RWA2|A0A0D9RWA2_CHLSB Uncharacterized protein OS=Chlorocebus sabaeus GN=SNRPA1 PE=4 SV=1	14	22	16	0	22	52
258	>tr|A0A0D9R933|A0A0D9R933_CHLSB Uncharacterized protein OS=Chlorocebus sabaeus GN=EPPK1 PE=4 SV=1	12	22	15	0	22	49
259	>tr|A0A0D9S7P0|A0A0D9S7P0_CHLSB Polyadenylate-binding protein OS=Chlorocebus sabaeus GN=PABPC4 PE=3 SV=1	18	3	22	0	22	43
260	>tr|A0A0D9S4P1|A0A0D9S4P1_CHLSB Uncharacterized protein OS=Chlorocebus sabaeus GN=MYH14 PE=4 SV=1	7	22	13	0	22	42
261	>tr|A0A0D9RDV7|A0A0D9RDV7_CHLSB Uncharacterized protein OS=Chlorocebus sabaeus GN=ARPC4 PE=4 SV=1	NaN	19	22	0	22	41
262	>tr|A0A0D9SBL0|A0A0D9SBL0_CHLSB 60S ribosomal protein L6 OS=Chlorocebus sabaeus PE=3 SV=1	13	6	22	0	22	41
263	>tr|A0A0D9S197|A0A0D9S197_CHLSB Uncharacterized protein OS=Chlorocebus sabaeus GN=HSD17B2 PE=3 SV=1	NaN	5	22	0	22	27
264	>tr|A0A0D9RQK6|A0A0D9RQK6_CHLSB Uncharacterized protein OS=Chlorocebus sabaeus GN=ACTR2 PE=3 SV=1	NaN	NaN	22	0	22	22
265	>tr|A0A0D9S9H0|A0A0D9S9H0_CHLSB Uncharacterized protein OS=Chlorocebus sabaeus GN=PURA PE=4 SV=1	NaN	NaN	22	0	22	22
266	>tr|A0A0D9S4H3|A0A0D9S4H3_CHLSB Uncharacterized protein OS=Chlorocebus sabaeus GN=GCN1L1 PE=4 SV=1	NaN	21	21	0	21	42
267	>tr|A0A0D9RLW4|A0A0D9RLW4_CHLSB ATP synthase subunit gamma OS=Chlorocebus sabaeus GN=ATP5C1 PE=3 SV=1	NaN	21	20	0	21	41
268	>tr|A0A0D9RWG7|A0A0D9RWG7_CHLSB Uncharacterized protein OS=Chlorocebus sabaeus GN=RPL14 PE=4 SV=1	5	10	21	0	21	36
269	>tr|A0A0D9R787|A0A0D9R787_CHLSB Uncharacterized protein OS=Chlorocebus sabaeus GN=RPL8 PE=3 SV=1	12	NaN	21	0	21	33
270	>tr|A0A0D9R825|A0A0D9R825_CHLSB Uncharacterized protein OS=Chlorocebus sabaeus GN=MPRIP PE=4 SV=1	NaN	12	21	0	21	33
271	>tr|A0A0D9RR49|A0A0D9RR49_CHLSB Uncharacterized protein OS=Chlorocebus sabaeus GN=STAU1 PE=4 SV=1	6	6	21	0	21	33
272	>tr|A0A0D9RGV0|A0A0D9RGV0_CHLSB Uncharacterized protein OS=Chlorocebus sabaeus GN=RRBP1 PE=4 SV=1	10	NaN	21	0	21	31
273	>tr|A0A0D9S5R4|A0A0D9S5R4_CHLSB Uncharacterized protein (Fragment) OS=Chlorocebus sabaeus GN=PGAM5 PE=4 SV=1	NaN	10	21	0	21	31
274	>tr|A0A0D9RD03|A0A0D9RD03_CHLSB Uncharacterized protein OS=Chlorocebus sabaeus GN=VCP PE=3 SV=1	21	NaN	NaN	0	21	21
275	>tr|A0A0D9RRR5|A0A0D9RRR5_CHLSB Uncharacterized protein (Fragment) OS=Chlorocebus sabaeus PE=4 SV=1	NaN	NaN	21	0	21	21
276	>tr|A0A0D9S5T5|A0A0D9S5T5_CHLSB Uncharacterized protein OS=Chlorocebus sabaeus GN=CGN PE=4 SV=1	NaN	NaN	21	0	21	21
277	>tr|A0A0D9S6D8|A0A0D9S6D8_CHLSB Uncharacterized protein OS=Chlorocebus sabaeus GN=MOV10 PE=4 SV=1	NaN	NaN	21	0	21	21
278	>tr|A0A0D9S9U1|A0A0D9S9U1_CHLSB Uncharacterized protein OS=Chlorocebus sabaeus PE=4 SV=1	NaN	NaN	21	0	21	21
279	>tr|A0A0D9R5N6|A0A0D9R5N6_CHLSB Uncharacterized protein OS=Chlorocebus sabaeus GN=FAU PE=4 SV=1	15	17	20	0	20	52
280	>tr|A0A0D9RZV8|A0A0D9RZV8_CHLSB Uncharacterized protein OS=Chlorocebus sabaeus GN=SF3B4 PE=4 SV=1	15	20	12	0	20	47
281	>tr|A3R0T6|A3R0T6_CHLAE Histone H1e OS=Chlorocebus aethiops PE=2 SV=1	20	3	19	0	20	42
282	>tr|A0A0D9RX05|A0A0D9RX05_CHLSB Uncharacterized protein OS=Chlorocebus sabaeus GN=UTRN PE=4 SV=1	NaN	13	20	0	20	33
283	>tr|A0A0D9QZZ8|A0A0D9QZZ8_CHLSB Uncharacterized protein OS=Chlorocebus sabaeus GN=KRT77 PE=3 SV=1	7	20	NaN	0	20	27
284	>tr|A0A0D9RNT7|A0A0D9RNT7_CHLSB Uncharacterized protein OS=Chlorocebus sabaeus PE=4 SV=1	20	NaN	NaN	0	20	20
285	>tr|A0A0D9S2N6|A0A0D9S2N6_CHLSB Uncharacterized protein OS=Chlorocebus sabaeus GN=FAT1 PE=4 SV=1	18	NaN	19	0	19	37
286	>tr|A0A0D9RSU9|A0A0D9RSU9_CHLSB Uncharacterized protein OS=Chlorocebus sabaeus GN=COL5A1 PE=4 SV=1	NaN	17	19	0	19	36
287	>tr|A0A0D9S618|A0A0D9S618_CHLSB Uncharacterized protein OS=Chlorocebus sabaeus GN=U2AF2 PE=4 SV=1	6	NaN	19	0	19	25
288	>tr|A0A0D9R4I4|A0A0D9R4I4_CHLSB Uncharacterized protein OS=Chlorocebus sabaeus GN=THBS1 PE=4 SV=1	NaN	5	19	0	19	24
289	>tr|A0A0D9QVV3|A0A0D9QVV3_CHLSB Uncharacterized protein OS=Chlorocebus sabaeus GN=HELZ PE=4 SV=1	NaN	NaN	19	0	19	19
290	>tr|A0A0D9QVV9|A0A0D9QVV9_CHLSB Uncharacterized protein OS=Chlorocebus sabaeus PE=4 SV=1	NaN	NaN	19	0	19	19
291	>tr|A0A0D9RQA2|A0A0D9RQA2_CHLSB Uncharacterized protein OS=Chlorocebus sabaeus GN=ASCC3 PE=4 SV=1	NaN	NaN	19	0	19	19
292	>tr|A0A0D9RQS0|A0A0D9RQS0_CHLSB Uncharacterized protein OS=Chlorocebus sabaeus GN=PRRC2B PE=4 SV=1	NaN	NaN	19	0	19	19
293	>tr|A0A0D9RTC1|A0A0D9RTC1_CHLSB Uncharacterized protein OS=Chlorocebus sabaeus GN=TNS3 PE=4 SV=1	NaN	NaN	19	0	19	19
294	>tr|A0A0D9RVN0|A0A0D9RVN0_CHLSB Uncharacterized protein OS=Chlorocebus sabaeus GN=TUBB4B PE=3 SV=1	18	16	18	0	18	52
295	>tr|A0A0D9S1C8|A0A0D9S1C8_CHLSB 60S ribosomal protein L27 OS=Chlorocebus sabaeus GN=RPL27 PE=3 SV=1	11	18	16	0	18	45
296	>tr|A0A0D9R082|A0A0D9R082_CHLSB Uncharacterized protein OS=Chlorocebus sabaeus GN=FUS PE=4 SV=1	11	11	18	0	18	40
297	>tr|A0A0D9RFF1|A0A0D9RFF1_CHLSB Uncharacterized protein (Fragment) OS=Chlorocebus sabaeus PE=3 SV=1	9	18	11	0	18	38
298	>tr|A0A0D9RGY4|A0A0D9RGY4_CHLSB Uncharacterized protein OS=Chlorocebus sabaeus GN=SNRPB2 PE=4 SV=1	8	18	9	0	18	35
299	>tr|A0A0D9RV86|A0A0D9RV86_CHLSB Uncharacterized protein OS=Chlorocebus sabaeus GN=ACTR3 PE=3 SV=1	NaN	9	18	0	18	27
300	>tr|A0A0D9RNX3|A0A0D9RNX3_CHLSB Uncharacterized protein OS=Chlorocebus sabaeus PE=4 SV=1	NaN	NaN	18	0	18	18
301	>tr|A0A0D9S2T4|A0A0D9S2T4_CHLSB Uncharacterized protein OS=Chlorocebus sabaeus GN=CRYAB PE=3 SV=1	NaN	NaN	18	0	18	18
302	>tr|A0A0D9S7F9|A0A0D9S7F9_CHLSB Uncharacterized protein OS=Chlorocebus sabaeus GN=PRDX1 PE=4 SV=1	NaN	NaN	18	0	18	18
303	>tr|A0A0D9SAF6|A0A0D9SAF6_CHLSB Uncharacterized protein OS=Chlorocebus sabaeus PE=4 SV=1	NaN	NaN	18	0	18	18
304	>tr|A0A0D9SD82|A0A0D9SD82_CHLSB Uncharacterized protein OS=Chlorocebus sabaeus GN=HSPA1L PE=3 SV=1	18	NaN	NaN	0	18	18
305	>tr|A0A0D9RQZ1|A0A0D9RQZ1_CHLSB Uncharacterized protein OS=Chlorocebus sabaeus GN=RPS23 PE=3 SV=1	11	12	17	0	17	40
306	>tr|A0A0D9S7S6|A0A0D9S7S6_CHLSB Uncharacterized protein OS=Chlorocebus sabaeus GN=THRAP3 PE=4 SV=1	15	5	17	0	17	37
307	>tr|A0A0D9SEF0|A0A0D9SEF0_CHLSB Uncharacterized protein OS=Chlorocebus sabaeus PE=4 SV=1	NaN	11	17	0	17	28
308	>tr|A0A0D9QZV6|A0A0D9QZV6_CHLSB Uncharacterized protein OS=Chlorocebus sabaeus GN=KRT78 PE=3 SV=1	17	2	4	0	17	23
309	>tr|A0A0D9RIN0|A0A0D9RIN0_CHLSB Uncharacterized protein OS=Chlorocebus sabaeus GN=DLST PE=3 SV=1	17	5	NaN	0	17	22
310	>tr|A0A0D9R3W4|A0A0D9R3W4_CHLSB Uncharacterized protein OS=Chlorocebus sabaeus GN=TRIP12 PE=4 SV=1	NaN	NaN	17	0	17	17
311	>tr|A0A0D9R8T1|A0A0D9R8T1_CHLSB Uncharacterized protein OS=Chlorocebus sabaeus GN=PDLIM7 PE=4 SV=1	NaN	NaN	17	0	17	17
312	>tr|A0A0D9RY55|A0A0D9RY55_CHLSB Uncharacterized protein OS=Chlorocebus sabaeus GN=DOCK9 PE=4 SV=1	NaN	NaN	17	0	17	17
313	>tr|A0A0D9RZB5|A0A0D9RZB5_CHLSB Uncharacterized protein OS=Chlorocebus sabaeus GN=GNB2 PE=4 SV=1	NaN	NaN	17	0	17	17
314	>tr|A0A0D9SA89|A0A0D9SA89_CHLSB Histone H2A OS=Chlorocebus sabaeus GN=HIST2H2AC PE=3 SV=1	17	NaN	NaN	0	17	17
315	>tr|A0A0D9R1R4|A0A0D9R1R4_CHLSB Uncharacterized protein OS=Chlorocebus sabaeus GN=RPL24 PE=4 SV=1	7	16	15	0	16	38
316	>tr|A0A0D9QYM3|A0A0D9QYM3_CHLSB Uncharacterized protein OS=Chlorocebus sabaeus GN=NUDT21 PE=4 SV=1	2	12	16	0	16	30
317	>tr|A0A0D9R9X4|A0A0D9R9X4_CHLSB Uncharacterized protein OS=Chlorocebus sabaeus GN=FN1 PE=4 SV=1	16	8	5	0	16	29
318	>tr|A0A0D9SCR9|A0A0D9SCR9_CHLSB Uncharacterized protein OS=Chlorocebus sabaeus GN=RPL31 PE=4 SV=1	6	5	16	0	16	27
319	>tr|A0A0D9R8N7|A0A0D9R8N7_CHLSB Uncharacterized protein OS=Chlorocebus sabaeus GN=B4GALT7 PE=4 SV=1	9	NaN	16	0	16	25
320	>tr|A0A0D9RQ30|A0A0D9RQ30_CHLSB Uncharacterized protein OS=Chlorocebus sabaeus GN=RPS20 PE=3 SV=1	8	NaN	16	0	16	24
321	>tr|A0A0D9R464|A0A0D9R464_CHLSB Uncharacterized protein OS=Chlorocebus sabaeus PE=3 SV=1	NaN	16	NaN	0	16	16
322	>tr|A0A0D9R869|A0A0D9R869_CHLSB Serine/threonine-protein phosphatase OS=Chlorocebus sabaeus GN=PPP1CA PE=3 SV=1	NaN	NaN	16	0	16	16
323	>tr|A0A0D9R981|A0A0D9R981_CHLSB Uncharacterized protein OS=Chlorocebus sabaeus GN=PPL PE=4 SV=1	NaN	NaN	16	0	16	16
324	>tr|A0A0D9RCZ4|A0A0D9RCZ4_CHLSB Uncharacterized protein OS=Chlorocebus sabaeus GN=HSP90AA1 PE=4 SV=1	16	NaN	NaN	0	16	16
325	>tr|A0A0D9RGI6|A0A0D9RGI6_CHLSB Clathrin heavy chain OS=Chlorocebus sabaeus GN=CLTCL1 PE=3 SV=1	NaN	NaN	16	0	16	16
326	>tr|A0A0D9RQH8|A0A0D9RQH8_CHLSB Uncharacterized protein OS=Chlorocebus sabaeus GN=FUBP3 PE=4 SV=1	NaN	NaN	16	0	16	16
327	>tr|A0A0D9RYT4|A0A0D9RYT4_CHLSB Uncharacterized protein OS=Chlorocebus sabaeus GN=TECPR1 PE=4 SV=1	NaN	NaN	16	0	16	16
328	>tr|A0A0D9RZC5|A0A0D9RZC5_CHLSB Uncharacterized protein OS=Chlorocebus sabaeus GN=HSPH1 PE=3 SV=1	NaN	NaN	16	0	16	16
329	>tr|A0A0D9S8B1|A0A0D9S8B1_CHLSB Uncharacterized protein OS=Chlorocebus sabaeus GN=HSPG2 PE=4 SV=1	NaN	NaN	16	0	16	16
330	>tr|A0A0D9R7Q9|A0A0D9R7Q9_CHLSB Uncharacterized protein OS=Chlorocebus sabaeus GN=SF3B6 PE=4 SV=1	14	15	15	0	15	44
331	>tr|A0A0D9RKY9|A0A0D9RKY9_CHLSB Uncharacterized protein OS=Chlorocebus sabaeus GN=HSPA9 PE=3 SV=1	15	14	14	0	15	43
332	>tr|A0A0D9RGH7|A0A0D9RGH7_CHLSB Uncharacterized protein OS=Chlorocebus sabaeus GN=MYO5A PE=4 SV=1	14	11	15	0	15	40
333	>tr|A0A0D9RAL5|A0A0D9RAL5_CHLSB 40S ribosomal protein S6 OS=Chlorocebus sabaeus GN=RPS6 PE=3 SV=1	13	6	15	0	15	34
334	>tr|A0A0D9R030|A0A0D9R030_CHLSB Uncharacterized protein OS=Chlorocebus sabaeus GN=KRT72 PE=3 SV=1	6	15	9	0	15	30
335	>tr|A0A0D9S109|A0A0D9S109_CHLSB Uncharacterized protein OS=Chlorocebus sabaeus GN=RPS19 PE=4 SV=1	8	7	15	0	15	30
336	>tr|A0A0D9R1I4|A0A0D9R1I4_CHLSB Uncharacterized protein OS=Chlorocebus sabaeus GN=CCDC105 PE=4 SV=1	NaN	15	11	0	15	26
337	>NSP5 (RRV-11- 198aa):	NaN	15	10	0	15	25
338	>tr|A0A0D9RVQ9|A0A0D9RVQ9_CHLSB Arginase OS=Chlorocebus sabaeus GN=ARG1 PE=3 SV=1	5	15	3	0	15	23
339	>tr|A0A0D9S913|A0A0D9S913_CHLSB Uncharacterized protein OS=Chlorocebus sabaeus GN=RPS27 PE=3 SV=1	NaN	3	15	0	15	18
340	>tr|A0A0D9SE44|A0A0D9SE44_CHLSB Uncharacterized protein OS=Chlorocebus sabaeus GN=RPS26 PE=4 SV=1	1	1	15	0	15	17
341	>tr|A0A0D9QWT3|A0A0D9QWT3_CHLSB Uncharacterized protein OS=Chlorocebus sabaeus GN=IPO7 PE=4 SV=1	NaN	NaN	15	0	15	15
342	>tr|A0A0D9QZD7|A0A0D9QZD7_CHLSB Catalase OS=Chlorocebus sabaeus GN=CAT PE=3 SV=1	NaN	15	NaN	0	15	15
343	>tr|A0A0D9R0V0|A0A0D9R0V0_CHLSB Uncharacterized protein OS=Chlorocebus sabaeus GN=TNKS1BP1 PE=4 SV=1	NaN	NaN	15	0	15	15
344	>tr|A0A0D9R4T8|A0A0D9R4T8_CHLSB Uncharacterized protein OS=Chlorocebus sabaeus GN=PKP2 PE=4 SV=1	NaN	NaN	15	0	15	15
345	>tr|A0A0D9RAD3|A0A0D9RAD3_CHLSB Uncharacterized protein OS=Chlorocebus sabaeus GN=C3 PE=4 SV=1	15	NaN	NaN	0	15	15
346	>tr|A0A0D9RFT3|A0A0D9RFT3_CHLSB Uncharacterized protein OS=Chlorocebus sabaeus GN=XRN1 PE=4 SV=1	NaN	NaN	15	0	15	15
347	>tr|A0A0D9RH15|A0A0D9RH15_CHLSB Eukaryotic translation initiation factor 3 subunit E OS=Chlorocebus sabaeus GN=EIF3E PE=3 SV=1	NaN	NaN	15	0	15	15
348	>tr|A0A0D9RNK1|A0A0D9RNK1_CHLSB Uncharacterized protein OS=Chlorocebus sabaeus GN=TRA2A PE=4 SV=1	NaN	NaN	15	0	15	15
349	>tr|A0A0D9RXA4|A0A0D9RXA4_CHLSB Uncharacterized protein OS=Chlorocebus sabaeus GN=EIF5B PE=4 SV=1	NaN	NaN	15	0	15	15
350	>tr|A0A0D9S2E6|A0A0D9S2E6_CHLSB Uncharacterized protein OS=Chlorocebus sabaeus GN=KRT17 PE=3 SV=1	12	8	14	0	14	34
351	>tr|A0A0D9RDI7|A0A0D9RDI7_CHLSB Uncharacterized protein OS=Chlorocebus sabaeus GN=RPL26 PE=3 SV=1	5	9	14	0	14	28
352	>tr|A0A0D9RNB6|A0A0D9RNB6_CHLSB Uncharacterized protein OS=Chlorocebus sabaeus GN=GPNMB PE=4 SV=1	8	5	14	0	14	27
353	>tr|A0A0D9RBM0|A0A0D9RBM0_CHLSB Ribosomal protein L15 OS=Chlorocebus sabaeus GN=RPL15 PE=3 SV=1	2	6	14	0	14	22
354	>tr|A0A0D9RYW9|A0A0D9RYW9_CHLSB Uncharacterized protein OS=Chlorocebus sabaeus GN=ARPC1A PE=4 SV=1	NaN	4	14	0	14	18
355	>tr|A0A0D9QZI9|A0A0D9QZI9_CHLSB 60S ribosomal protein L18a OS=Chlorocebus sabaeus GN=RPL18A PE=3 SV=1	2	NaN	14	0	14	16
356	>sp|P62938|PPIA_CHLAE Peptidyl-prolyl cis-trans isomerase A OS=Chlorocebus aethiops GN=PPIA PE=2 SV=2	NaN	NaN	14	0	14	14
357	>tr|A0A0D9R6D5|A0A0D9R6D5_CHLSB Uncharacterized protein OS=Chlorocebus sabaeus GN=CMAS PE=4 SV=1	NaN	NaN	14	0	14	14
358	>tr|A0A0D9R7V8|A0A0D9R7V8_CHLSB Uncharacterized protein OS=Chlorocebus sabaeus PE=4 SV=1	NaN	NaN	14	0	14	14
359	>tr|A0A0D9RAI4|A0A0D9RAI4_CHLSB Uncharacterized protein OS=Chlorocebus sabaeus GN=CLASP2 PE=4 SV=1	NaN	NaN	14	0	14	14
360	>tr|A0A0D9RD33|A0A0D9RD33_CHLSB Uncharacterized protein OS=Chlorocebus sabaeus GN=SRSF3 PE=4 SV=1	NaN	NaN	14	0	14	14
361	>tr|A0A0D9RJK6|A0A0D9RJK6_CHLSB Uncharacterized protein OS=Chlorocebus sabaeus GN=CDK6 PE=4 SV=1	NaN	NaN	14	0	14	14
362	>tr|A0A0D9RX52|A0A0D9RX52_CHLSB Uncharacterized protein OS=Chlorocebus sabaeus GN=MAP4K4 PE=4 SV=1	NaN	NaN	14	0	14	14
363	>tr|A0A0D9SA64|A0A0D9SA64_CHLSB Uncharacterized protein OS=Chlorocebus sabaeus GN=APOBEC4 PE=4 SV=1	NaN	14	NaN	0	14	14
364	>tr|A0A0D9SC51|A0A0D9SC51_CHLSB Uncharacterized protein OS=Chlorocebus sabaeus GN=RPL32 PE=4 SV=1	NaN	NaN	14	0	14	14
365	>tr|A0A0D9SE27|A0A0D9SE27_CHLSB Uncharacterized protein OS=Chlorocebus sabaeus PE=3 SV=1	14	NaN	NaN	0	14	14
366	>tr|H2E098|H2E098_CHLPG Apolipoprotein B mRNA editing enzyme- catalytic polypeptide-like 3G OS=Chlorocebus pygerythrus GN=APOBEC3G PE=2 SV=1	NaN	NaN	14	0	14	14
367	>tr|A0A0D9S148|A0A0D9S148_CHLSB Uncharacterized protein OS=Chlorocebus sabaeus GN=CIC PE=4 SV=1	12	8	13	0	13	33
368	>tr|A0A0D9SAU5|A0A0D9SAU5_CHLSB Uncharacterized protein OS=Chlorocebus sabaeus PE=3 SV=1	NaN	13	13	0	13	26
369	>tr|A0A0D9RRX3|A0A0D9RRX3_CHLSB Uncharacterized protein OS=Chlorocebus sabaeus PE=3 SV=1	13	11	NaN	0	13	24
370	>tr|A0A0D9RY59|A0A0D9RY59_CHLSB Uncharacterized protein OS=Chlorocebus sabaeus GN=FARP1 PE=4 SV=1	NaN	9	13	0	13	22
371	>tr|A0A0D9SCL0|A0A0D9SCL0_CHLSB Histone H3 OS=Chlorocebus sabaeus GN=HIST1H3E PE=3 SV=1	13	NaN	9	0	13	22
372	>tr|A0A0D9R381|A0A0D9R381_CHLSB Uncharacterized protein OS=Chlorocebus sabaeus GN=TWF1 PE=4 SV=1	NaN	4	13	0	13	17
373	>tr|A0A0D9R7K5|A0A0D9R7K5_CHLSB Uncharacterized protein OS=Chlorocebus sabaeus GN=SQSTM1 PE=4 SV=1	NaN	NaN	13	0	13	13
374	>tr|A0A0D9R9R9|A0A0D9R9R9_CHLSB Uncharacterized protein OS=Chlorocebus sabaeus GN=VDAC2 PE=4 SV=1	NaN	NaN	13	0	13	13
375	>tr|A0A0D9RGI5|A0A0D9RGI5_CHLSB DNA-directed RNA polymerase OS=Chlorocebus sabaeus GN=POLR2A PE=3 SV=1	NaN	NaN	13	0	13	13
376	>tr|A0A0D9RNB8|A0A0D9RNB8_CHLSB Ubiquitin carboxyl-terminal hydrolase OS=Chlorocebus sabaeus GN=USP9X PE=3 SV=1	NaN	NaN	13	0	13	13
377	>tr|A0A0D9RVI8|A0A0D9RVI8_CHLSB Uncharacterized protein OS=Chlorocebus sabaeus PE=4 SV=1	13	NaN	NaN	0	13	13
378	>tr|A0A0D9S1A8|A0A0D9S1A8_CHLSB Uncharacterized protein OS=Chlorocebus sabaeus GN=XRCC1 PE=4 SV=1	NaN	NaN	13	0	13	13
379	>tr|A0A0D9S3C9|A0A0D9S3C9_CHLSB Ribosomal protein L19 OS=Chlorocebus sabaeus GN=RPL19 PE=3 SV=1	NaN	NaN	13	0	13	13
380	>tr|A0A0D9SCP1|A0A0D9SCP1_CHLSB Uncharacterized protein (Fragment) OS=Chlorocebus sabaeus PE=4 SV=1	NaN	NaN	13	0	13	13
381	>tr|A0A0D9RFK0|A0A0D9RFK0_CHLSB Uncharacterized protein OS=Chlorocebus sabaeus GN=THAP5 PE=4 SV=1	11	11	12	0	12	34
382	>tr|A0A0D9RVD5|A0A0D9RVD5_CHLSB Uncharacterized protein OS=Chlorocebus sabaeus PE=4 SV=1	7	12	12	0	12	31
383	>tr|A0A0D9SE18|A0A0D9SE18_CHLSB Uncharacterized protein OS=Chlorocebus sabaeus GN=RPL3 PE=3 SV=1	12	12	7	0	12	31
384	>tr|A0A0D9RYI9|A0A0D9RYI9_CHLSB Uncharacterized protein OS=Chlorocebus sabaeus GN=SNRPD1 PE=4 SV=1	6	12	12	0	12	30
385	>tr|A0A0D9RXQ9|A0A0D9RXQ9_CHLSB Uncharacterized protein OS=Chlorocebus sabaeus GN=SYNCRIP PE=4 SV=1	9	6	12	0	12	27
386	>tr|A0A0D9QWP9|A0A0D9QWP9_CHLSB Uncharacterized protein OS=Chlorocebus sabaeus PE=3 SV=1	7	7	12	0	12	26
387	>tr|A0A0D9RI58|A0A0D9RI58_CHLSB Uncharacterized protein OS=Chlorocebus sabaeus GN=RPS15 PE=3 SV=1	11	2	12	0	12	25
388	>tr|A0A0D9RN36|A0A0D9RN36_CHLSB Uncharacterized protein OS=Chlorocebus sabaeus PE=4 SV=1	6	7	12	0	12	25
389	>tr|A0A0D9RN62|A0A0D9RN62_CHLSB Uncharacterized protein OS=Chlorocebus sabaeus GN=WDR81 PE=4 SV=1	12	7	4	0	12	23
390	>tr|A0A0D9SDI7|A0A0D9SDI7_CHLSB Uncharacterized protein OS=Chlorocebus sabaeus PE=4 SV=1	12	5	6	0	12	23
391	>tr|A0A0D9RKI6|A0A0D9RKI6_CHLSB Uncharacterized protein OS=Chlorocebus sabaeus GN=SLC25A11 PE=3 SV=1	NaN	10	12	0	12	22
392	>tr|A0A0D9R6L7|A0A0D9R6L7_CHLSB Uncharacterized protein OS=Chlorocebus sabaeus PE=4 SV=1	3	6	12	0	12	21
393	>tr|A0A0D9QXX9|A0A0D9QXX9_CHLSB Uncharacterized protein OS=Chlorocebus sabaeus GN=ABLIM1 PE=4 SV=1	NaN	7	12	0	12	19
394	>tr|A0A0D9RXE2|A0A0D9RXE2_CHLSB Protein-L-isoaspartate O-methyltransferase OS=Chlorocebus sabaeus GN=PCMT1 PE=3 SV=1	NaN	4	12	0	12	16
395	>tr|A0A0D9R1H5|A0A0D9R1H5_CHLSB Fructose-bisphosphate aldolase OS=Chlorocebus sabaeus GN=ALDOA PE=3 SV=1	NaN	NaN	12	0	12	12
396	>tr|A0A0D9R1H9|A0A0D9R1H9_CHLSB Uncharacterized protein OS=Chlorocebus sabaeus GN=CASP14 PE=3 SV=1	NaN	12	NaN	0	12	12
397	>tr|A0A0D9RA81|A0A0D9RA81_CHLSB Uncharacterized protein OS=Chlorocebus sabaeus GN=DLG5 PE=4 SV=1	NaN	NaN	12	0	12	12
398	>tr|A0A0D9RBI7|A0A0D9RBI7_CHLSB DNA topoisomerase 2 OS=Chlorocebus sabaeus GN=TOP2B PE=3 SV=1	NaN	NaN	12	0	12	12
399	>tr|A0A0D9RHH6|A0A0D9RHH6_CHLSB Uncharacterized protein OS=Chlorocebus sabaeus GN=GNAI1 PE=4 SV=1	NaN	NaN	12	0	12	12
400	>tr|A0A0D9RW04|A0A0D9RW04_CHLSB Uncharacterized protein OS=Chlorocebus sabaeus GN=PCM1 PE=4 SV=1	NaN	NaN	12	0	12	12
401	>tr|A0A0D9RX51|A0A0D9RX51_CHLSB Kinesin-like protein OS=Chlorocebus sabaeus GN=KIF7 PE=3 SV=1	12	NaN	NaN	0	12	12
402	>tr|A0A0D9S7Y1|A0A0D9S7Y1_CHLSB Uncharacterized protein OS=Chlorocebus sabaeus GN=KHDRBS1 PE=4 SV=1	NaN	NaN	12	0	12	12
403	>tr|A0A0D9SDL3|A0A0D9SDL3_CHLSB Ribosomal protein (Fragment) OS=Chlorocebus sabaeus PE=3 SV=1	NaN	12	NaN	0	12	12
404	>tr|A0A0D9RE72|A0A0D9RE72_CHLSB Uncharacterized protein OS=Chlorocebus sabaeus GN=TF PE=3 SV=1	7	11	8	0	11	26
405	>tr|A0A0D9REP7|A0A0D9REP7_CHLSB Uncharacterized protein OS=Chlorocebus sabaeus GN=EEF2 PE=4 SV=1	9	NaN	11	0	11	20
406	>tr|Q2VIM8|Q2VIM8_CHLSB RBM1 (Fragment) OS=Chlorocebus sabaeus PE=4 SV=1	NaN	6	11	0	11	17
407	>tr|A0A0D9R049|A0A0D9R049_CHLSB Uncharacterized protein OS=Chlorocebus sabaeus GN=KRT71 PE=3 SV=1	11	2	NaN	0	11	13
408	>tr|A0A0D9S8X5|A0A0D9S8X5_CHLSB Uncharacterized protein OS=Chlorocebus sabaeus PE=4 SV=1	NaN	1	11	0	11	12
409	>sp|P33194|DDB1_CHLAE DNA damage-binding protein 1 OS=Chlorocebus aethiops GN=DDB1 PE=1 SV=1	NaN	NaN	11	0	11	11
410	>tr|A0A0D9R241|A0A0D9R241_CHLSB Uncharacterized protein OS=Chlorocebus sabaeus PE=4 SV=1	NaN	11	NaN	0	11	11
411	>tr|A0A0D9R2Q7|A0A0D9R2Q7_CHLSB Uncharacterized protein OS=Chlorocebus sabaeus GN=HECTD2 PE=4 SV=1	NaN	NaN	11	0	11	11
412	>tr|A0A0D9R337|A0A0D9R337_CHLSB Uncharacterized protein OS=Chlorocebus sabaeus GN=SCAF11 PE=4 SV=1	NaN	NaN	11	0	11	11
413	>tr|A0A0D9R4M7|A0A0D9R4M7_CHLSB Uncharacterized protein OS=Chlorocebus sabaeus GN=BICC1 PE=4 SV=1	NaN	NaN	11	0	11	11
414	>tr|A0A0D9R5H3|A0A0D9R5H3_CHLSB Uncharacterized protein OS=Chlorocebus sabaeus GN=MYLK PE=4 SV=1	NaN	NaN	11	0	11	11
415	>tr|A0A0D9R959|A0A0D9R959_CHLSB Uncharacterized protein OS=Chlorocebus sabaeus GN=SCRIB PE=4 SV=1	NaN	NaN	11	0	11	11
416	>tr|A0A0D9RBJ0|A0A0D9RBJ0_CHLSB Uncharacterized protein OS=Chlorocebus sabaeus PE=3 SV=1	NaN	NaN	11	0	11	11
417	>tr|A0A0D9RHG5|A0A0D9RHG5_CHLSB Uncharacterized protein OS=Chlorocebus sabaeus GN=FAM98A PE=4 SV=1	NaN	NaN	11	0	11	11
418	>tr|A0A0D9RJY4|A0A0D9RJY4_CHLSB Uncharacterized protein OS=Chlorocebus sabaeus GN=PLEKHH2 PE=4 SV=1	NaN	NaN	11	0	11	11
419	>tr|A0A0D9RPF2|A0A0D9RPF2_CHLSB Uncharacterized protein OS=Chlorocebus sabaeus GN=CREB5 PE=4 SV=1	NaN	NaN	11	0	11	11
420	>tr|A0A0D9RS70|A0A0D9RS70_CHLSB Uncharacterized protein OS=Chlorocebus sabaeus GN=IQGAP2 PE=4 SV=1	NaN	NaN	11	0	11	11
421	>tr|A0A0D9RUC6|A0A0D9RUC6_CHLSB Uncharacterized protein OS=Chlorocebus sabaeus GN=RAB3C PE=4 SV=1	11	NaN	NaN	0	11	11
422	>tr|A0A0D9RY99|A0A0D9RY99_CHLSB Uncharacterized protein OS=Chlorocebus sabaeus GN=MICALL2 PE=4 SV=1	NaN	NaN	11	0	11	11
423	>tr|A0A0D9S4S3|A0A0D9S4S3_CHLSB Uncharacterized protein OS=Chlorocebus sabaeus GN=NES PE=3 SV=1	NaN	NaN	11	0	11	11
424	>tr|A0A0D9S737|A0A0D9S737_CHLSB Uncharacterized protein OS=Chlorocebus sabaeus GN=DOCK7 PE=4 SV=1	NaN	NaN	11	0	11	11
425	>tr|A0A0D9S9Z2|A0A0D9S9Z2_CHLSB Uncharacterized protein OS=Chlorocebus sabaeus GN=MORF4L2 PE=4 SV=1	NaN	NaN	11	0	11	11
426	>tr|A0A0D9SB72|A0A0D9SB72_CHLSB Uncharacterized protein OS=Chlorocebus sabaeus PE=3 SV=1	NaN	NaN	11	0	11	11
427	>tr|Q5D0W6|Q5D0W6_CHLAE P-glycoprotein OS=Chlorocebus aethiops GN=ABCB1 PE=2 SV=1	NaN	NaN	11	0	11	11
428	>tr|A0A0D9RZ06|A0A0D9RZ06_CHLSB Uncharacterized protein OS=Chlorocebus sabaeus GN=DSC1 PE=4 SV=1	7	10	7	0	10	24
429	>tr|A0A0D9SDP0|A0A0D9SDP0_CHLSB Uncharacterized protein OS=Chlorocebus sabaeus PE=4 SV=1	NaN	10	10	0	10	20
430	>tr|A0A0D9R1C9|A0A0D9R1C9_CHLSB Uncharacterized protein OS=Chlorocebus sabaeus GN=MVP PE=4 SV=1	NaN	9	10	0	10	19
431	>tr|A0A0D9SCH4|A0A0D9SCH4_CHLSB Uncharacterized protein OS=Chlorocebus sabaeus GN=CALML5 PE=4 SV=1	10	NaN	9	0	10	19
432	>tr|A0A0D9RTV5|A0A0D9RTV5_CHLSB Uncharacterized protein OS=Chlorocebus sabaeus GN=DHX30 PE=4 SV=1	5	NaN	10	0	10	15
433	>tr|A0A0D9R2K7|A0A0D9R2K7_CHLSB Uncharacterized protein OS=Chlorocebus sabaeus GN=TNRC6A PE=4 SV=1	NaN	NaN	10	0	10	10
434	>tr|A0A0D9R719|A0A0D9R719_CHLSB Uncharacterized protein OS=Chlorocebus sabaeus GN=FLII PE=4 SV=1	NaN	NaN	10	0	10	10
435	>tr|A0A0D9R8Q2|A0A0D9R8Q2_CHLSB Uncharacterized protein OS=Chlorocebus sabaeus GN=HADHA PE=3 SV=1	NaN	NaN	10	0	10	10
436	>tr|A0A0D9RHV9|A0A0D9RHV9_CHLSB Uncharacterized protein OS=Chlorocebus sabaeus GN=YWHAZ PE=3 SV=1	NaN	NaN	10	0	10	10
437	>tr|A0A0D9RK37|A0A0D9RK37_CHLSB Uncharacterized protein OS=Chlorocebus sabaeus GN=SSFA2 PE=4 SV=1	NaN	NaN	10	0	10	10
438	>tr|A0A0D9RNM2|A0A0D9RNM2_CHLSB Uncharacterized protein OS=Chlorocebus sabaeus GN=YWHAE PE=3 SV=1	10	NaN	NaN	0	10	10
439	>tr|A0A0D9RSP2|A0A0D9RSP2_CHLSB Protein-tyrosine-phosphatase OS=Chlorocebus sabaeus GN=PTPN14 PE=4 SV=1	NaN	NaN	10	0	10	10
440	>tr|A0A0D9RTU5|A0A0D9RTU5_CHLSB Uncharacterized protein OS=Chlorocebus sabaeus GN=MYH7 PE=4 SV=1	10	NaN	NaN	0	10	10
441	>tr|A0A0D9RUB7|A0A0D9RUB7_CHLSB Uncharacterized protein OS=Chlorocebus sabaeus GN=CCT6A PE=3 SV=1	NaN	NaN	10	0	10	10
442	>tr|A0A0D9RWS6|A0A0D9RWS6_CHLSB Uncharacterized protein OS=Chlorocebus sabaeus GN=RANBP2 PE=4 SV=1	NaN	NaN	10	0	10	10
443	>tr|A0A0D9RXZ5|A0A0D9RXZ5_CHLSB Uncharacterized protein OS=Chlorocebus sabaeus GN=MYO6 PE=4 SV=1	NaN	NaN	10	0	10	10
444	>tr|A0A0D9RZX0|A0A0D9RZX0_CHLSB Uncharacterized protein OS=Chlorocebus sabaeus GN=MDH2 PE=3 SV=1	10	NaN	NaN	0	10	10
445	>tr|A0A0D9S3F8|A0A0D9S3F8_CHLSB Proteasome subunit beta type OS=Chlorocebus sabaeus GN=PSMB3 PE=3 SV=1	NaN	NaN	10	0	10	10
446	>tr|A0A0D9S485|A0A0D9S485_CHLSB Uncharacterized protein OS=Chlorocebus sabaeus GN=VRK3 PE=4 SV=1	NaN	NaN	10	0	10	10
447	>tr|A0A0D9S818|A0A0D9S818_CHLSB Uncharacterized protein OS=Chlorocebus sabaeus GN=RPA2 PE=4 SV=1	NaN	NaN	10	0	10	10
448	>tr|A0A0D9S9F8|A0A0D9S9F8_CHLSB Uncharacterized protein OS=Chlorocebus sabaeus PE=4 SV=1	10	NaN	NaN	0	10	10
449	>tr|A0A0D9S5Q5|A0A0D9S5Q5_CHLSB Uncharacterized protein OS=Chlorocebus sabaeus GN=FLG2 PE=4 SV=1	9	9	7	0	9	25
450	>tr|A0A0D9S0V3|A0A0D9S0V3_CHLSB Uncharacterized protein OS=Chlorocebus sabaeus GN=GRN PE=4 SV=1	9	NaN	8	0	9	17
451	>tr|A0A0D9R016|A0A0D9R016_CHLSB Uncharacterized protein OS=Chlorocebus sabaeus GN=KRT2 PE=3 SV=1	NaN	9	6	0	9	15
452	>tr|A0A0D9S3H8|A0A0D9S3H8_CHLSB Uncharacterized protein OS=Chlorocebus sabaeus GN=HNRNPAB PE=4 SV=1	NaN	4	9	0	9	13
453	>tr|A0A0D9QX38|A0A0D9QX38_CHLSB Uncharacterized protein OS=Chlorocebus sabaeus GN=SHROOM3 PE=4 SV=1	NaN	NaN	9	0	9	9
454	>tr|A0A0D9R7S5|A0A0D9R7S5_CHLSB Uncharacterized protein OS=Chlorocebus sabaeus GN=C7orf55-LUC7L2 PE=4 SV=1	NaN	NaN	9	0	9	9
455	>tr|A0A0D9R7S9|A0A0D9R7S9_CHLSB Uncharacterized protein OS=Chlorocebus sabaeus GN=SREBF1 PE=4 SV=1	9	NaN	NaN	0	9	9
456	>tr|A0A0D9R7W9|A0A0D9R7W9_CHLSB Uncharacterized protein OS=Chlorocebus sabaeus GN=TJP2 PE=4 SV=1	NaN	NaN	9	0	9	9
457	>tr|A0A0D9R8N3|A0A0D9R8N3_CHLSB Uncharacterized protein OS=Chlorocebus sabaeus GN=RCAN1 PE=4 SV=1	NaN	NaN	9	0	9	9
458	>tr|A0A0D9RB59|A0A0D9RB59_CHLSB Dual specificity protein phosphatase OS=Chlorocebus sabaeus GN=DUSP1 PE=3 SV=1	NaN	NaN	9	0	9	9
459	>tr|A0A0D9RBW5|A0A0D9RBW5_CHLSB Uncharacterized protein OS=Chlorocebus sabaeus GN=RPL36AL PE=3 SV=1	NaN	NaN	9	0	9	9
460	>tr|A0A0D9RDA8|A0A0D9RDA8_CHLSB Uncharacterized protein OS=Chlorocebus sabaeus GN=SRRM2 PE=4 SV=1	9	NaN	NaN	0	9	9
461	>tr|A0A0D9REH0|A0A0D9REH0_CHLSB Tyrosine-protein kinase receptor OS=Chlorocebus sabaeus GN=ALK PE=3 SV=1	NaN	9	NaN	0	9	9
462	>tr|A0A0D9RLR1|A0A0D9RLR1_CHLSB Core histone macro-H2A OS=Chlorocebus sabaeus GN=H2AFY PE=4 SV=1	NaN	NaN	9	0	9	9
463	>tr|A0A0D9RML4|A0A0D9RML4_CHLSB Uncharacterized protein OS=Chlorocebus sabaeus GN=PSMD2 PE=4 SV=1	NaN	NaN	9	0	9	9
464	>tr|A0A0D9RNI1|A0A0D9RNI1_CHLSB Uncharacterized protein OS=Chlorocebus sabaeus GN=TRA2B PE=4 SV=1	NaN	NaN	9	0	9	9
465	>tr|A0A0D9RPD2|A0A0D9RPD2_CHLSB DNA polymerase OS=Chlorocebus sabaeus GN=POLA1 PE=3 SV=1	NaN	NaN	9	0	9	9
466	>tr|A0A0D9RSS8|A0A0D9RSS8_CHLSB Uncharacterized protein OS=Chlorocebus sabaeus GN=BAZ1A PE=4 SV=1	NaN	NaN	9	0	9	9
467	>tr|A0A0D9RZI5|A0A0D9RZI5_CHLSB Uncharacterized protein OS=Chlorocebus sabaeus GN=PARP4 PE=4 SV=1	NaN	NaN	9	0	9	9
468	>tr|A0A0D9S8B7|A0A0D9S8B7_CHLSB Uncharacterized protein OS=Chlorocebus sabaeus GN=EIF4G3 PE=4 SV=1	NaN	NaN	9	0	9	9
469	>tr|A0A0D9S8E4|A0A0D9S8E4_CHLSB Uncharacterized protein OS=Chlorocebus sabaeus GN=UBR4 PE=4 SV=1	NaN	NaN	9	0	9	9
470	>tr|A0A0D9SAC9|A0A0D9SAC9_CHLSB Uncharacterized protein OS=Chlorocebus sabaeus GN=RPS28 PE=4 SV=1	NaN	NaN	9	0	9	9
471	>tr|A0A0D9RDZ6|A0A0D9RDZ6_CHLSB Uncharacterized protein OS=Chlorocebus sabaeus PE=3 SV=1	8	4	6	0	8	18
472	>tr|A0A0D9SBM5|A0A0D9SBM5_CHLSB Uncharacterized protein OS=Chlorocebus sabaeus GN=SNRPE PE=4 SV=1	4	6	8	0	8	18
473	>tr|A0A0D9SCE0|A0A0D9SCE0_CHLSB Uncharacterized protein OS=Chlorocebus sabaeus GN=RPL21 PE=4 SV=1	4	6	8	0	8	18
474	>tr|A0A0D9RVA9|A0A0D9RVA9_CHLSB Uncharacterized protein OS=Chlorocebus sabaeus PE=4 SV=1	8	4	5	0	8	17
475	>tr|A0A0D9RXA3|A0A0D9RXA3_CHLSB Uncharacterized protein OS=Chlorocebus sabaeus PE=4 SV=1	7	8	NaN	0	8	15
476	>tr|A0A0D9S8G1|A0A0D9S8G1_CHLSB Uncharacterized protein (Fragment) OS=Chlorocebus sabaeus GN=CROCC PE=4 SV=1	NaN	7	8	0	8	15
477	>tr|A0A0D9R0I1|A0A0D9R0I1_CHLSB Uncharacterized protein OS=Chlorocebus sabaeus GN=PHF5A PE=4 SV=1	NaN	8	6	0	8	14
478	>tr|A0A0D9RC62|A0A0D9RC62_CHLSB Uncharacterized protein OS=Chlorocebus sabaeus GN=SOGA1 PE=4 SV=1	8	NaN	6	0	8	14
479	>tr|A0A0D9RIL8|A0A0D9RIL8_CHLSB Uncharacterized protein OS=Chlorocebus sabaeus GN=ARF4 PE=4 SV=1	3	8	3	0	8	14
480	>tr|A0A0D9S3P5|A0A0D9S3P5_CHLSB Coatomer subunit alpha OS=Chlorocebus sabaeus GN=COPA PE=4 SV=1	NaN	6	8	0	8	14
481	>tr|A0A0D9R6B0|A0A0D9R6B0_CHLSB Uncharacterized protein (Fragment) OS=Chlorocebus sabaeus PE=3 SV=1	4	8	NaN	0	8	12
482	>tr|A0A0D9SAE0|A0A0D9SAE0_CHLSB Uncharacterized protein (Fragment) OS=Chlorocebus sabaeus GN=ATP5J2 PE=4 SV=1	2	2	8	0	8	12
483	>tr|A0A0D9SDT2|A0A0D9SDT2_CHLSB Uncharacterized protein OS=Chlorocebus sabaeus GN=ATP5O PE=3 SV=1	NaN	4	8	0	8	12
484	>tr|A0A0D9R1W7|A0A0D9R1W7_CHLSB Elongation factor Tu OS=Chlorocebus sabaeus GN=TUFM PE=3 SV=1	NaN	8	3	0	8	11
485	>tr|A0A0D9RNA2|A0A0D9RNA2_CHLSB Uncharacterized protein OS=Chlorocebus sabaeus GN=DDX3X PE=3 SV=1	1	1	8	0	8	10
486	>tr|A0A0D9QVP1|A0A0D9QVP1_CHLSB Uncharacterized protein OS=Chlorocebus sabaeus GN=PSMD8 PE=4 SV=1	NaN	NaN	8	0	8	8
487	>tr|A0A0D9QZ85|A0A0D9QZ85_CHLSB Uncharacterized protein OS=Chlorocebus sabaeus GN=GDF15 PE=3 SV=1	NaN	NaN	8	0	8	8
488	>tr|A0A0D9R0Y0|A0A0D9R0Y0_CHLSB Uncharacterized protein OS=Chlorocebus sabaeus GN=LARP4 PE=4 SV=1	NaN	NaN	8	0	8	8
489	>tr|A0A0D9R8H0|A0A0D9R8H0_CHLSB Uncharacterized protein OS=Chlorocebus sabaeus GN=KIAA1549 PE=4 SV=1	NaN	NaN	8	0	8	8
490	>tr|A0A0D9RBA7|A0A0D9RBA7_CHLSB Uncharacterized protein OS=Chlorocebus sabaeus GN=ITPR3 PE=4 SV=1	NaN	NaN	8	0	8	8
491	>tr|A0A0D9RDT3|A0A0D9RDT3_CHLSB Condensin complex subunit 1 OS=Chlorocebus sabaeus GN=NCAPD2 PE=3 SV=1	NaN	NaN	8	0	8	8
492	>tr|A0A0D9RDU4|A0A0D9RDU4_CHLSB Uncharacterized protein OS=Chlorocebus sabaeus GN=DNAJC13 PE=4 SV=1	NaN	NaN	8	0	8	8
493	>tr|A0A0D9RGD6|A0A0D9RGD6_CHLSB Uncharacterized protein OS=Chlorocebus sabaeus GN=CP PE=4 SV=1	8	NaN	NaN	0	8	8
494	>tr|A0A0D9RHD6|A0A0D9RHD6_CHLSB Proteasome subunit beta type OS=Chlorocebus sabaeus GN=PSMB1 PE=3 SV=1	NaN	NaN	8	0	8	8
495	>tr|A0A0D9RHV5|A0A0D9RHV5_CHLSB Uncharacterized protein OS=Chlorocebus sabaeus GN=SLTM PE=4 SV=1	NaN	8	NaN	0	8	8
496	>tr|A0A0D9RS82|A0A0D9RS82_CHLSB Uncharacterized protein OS=Chlorocebus sabaeus GN=CCT7 PE=3 SV=1	NaN	NaN	8	0	8	8
497	>tr|A0A0D9RSM7|A0A0D9RSM7_CHLSB Proteasome subunit alpha type OS=Chlorocebus sabaeus GN=PSMA6 PE=3 SV=1	NaN	NaN	8	0	8	8
498	>tr|A0A0D9S2M1|A0A0D9S2M1_CHLSB Uncharacterized protein (Fragment) OS=Chlorocebus sabaeus GN=RDX PE=4 SV=1	NaN	NaN	8	0	8	8
499	>tr|A0A0D9S520|A0A0D9S520_CHLSB Uncharacterized protein (Fragment) OS=Chlorocebus sabaeus GN=ARL6IP4 PE=4 SV=1	8	NaN	NaN	0	8	8
500	>tr|A0A0D9SDY5|A0A0D9SDY5_CHLSB Uncharacterized protein OS=Chlorocebus sabaeus GN=RPL22 PE=4 SV=1	NaN	NaN	8	0	8	8
501	>tr|A0A0D9R0I0|A0A0D9R0I0_CHLSB Uncharacterized protein OS=Chlorocebus sabaeus GN=KRT80 PE=4 SV=1	5	7	7	0	7	19
502	>tr|A0A0D9QZZ9|A0A0D9QZZ9_CHLSB Ribosomal protein L34 OS=Chlorocebus sabaeus GN=MRPL34 PE=3 SV=1	7	6	5	0	7	18
503	>tr|A0A0D9S890|A0A0D9S890_CHLSB Uncharacterized protein OS=Chlorocebus sabaeus PE=3 SV=1	6	5	7	0	7	18
504	>tr|A0A0D9S2G7|A0A0D9S2G7_CHLSB Uncharacterized protein OS=Chlorocebus sabaeus PE=3 SV=1	2	5	7	0	7	14
505	>tr|A0A0D9QYU5|A0A0D9QYU5_CHLSB Uncharacterized protein OS=Chlorocebus sabaeus GN=MYL6B PE=4 SV=1	NaN	6	7	0	7	13
506	>tr|A0A0D9RVD1|A0A0D9RVD1_CHLSB Uncharacterized protein OS=Chlorocebus sabaeus PE=4 SV=1	NaN	7	6	0	7	13
507	>tr|A0A0D9S6Y9|A0A0D9S6Y9_CHLSB Uncharacterized protein OS=Chlorocebus sabaeus GN=ACADM PE=3 SV=1	4	7	2	0	7	13
508	>tr|A0A0D9R9S6|A0A0D9R9S6_CHLSB Uncharacterized protein OS=Chlorocebus sabaeus GN=TMEM169 PE=4 SV=1	4	7	1	0	7	12
509	>tr|A0A0D9RT40|A0A0D9RT40_CHLSB Histone H2A OS=Chlorocebus sabaeus GN=H2AFV PE=3 SV=1	5	NaN	7	0	7	12
510	>tr|A0A0D9S2X8|A0A0D9S2X8_CHLSB Uncharacterized protein OS=Chlorocebus sabaeus GN=KRT27 PE=4 SV=1	5	7	NaN	0	7	12
511	>tr|A0A0D9QWR4|A0A0D9QWR4_CHLSB Uncharacterized protein OS=Chlorocebus sabaeus GN=HNRNPD PE=4 SV=1	NaN	3	7	0	7	10
512	>tr|A0A0D9S488|A0A0D9S488_CHLSB Uncharacterized protein OS=Chlorocebus sabaeus GN=LGALS3BP PE=4 SV=1	NaN	7	3	0	7	10
513	>tr|A0A0D9RAI5|A0A0D9RAI5_CHLSB Uncharacterized protein OS=Chlorocebus sabaeus GN=NOP16 PE=4 SV=1	NaN	7	2	0	7	9
514	>tr|A0A0D9RCP4|A0A0D9RCP4_CHLSB Uncharacterized protein OS=Chlorocebus sabaeus GN=PHB2 PE=4 SV=1	2	NaN	7	0	7	9
515	>tr|A0A0D9RNF7|A0A0D9RNF7_CHLSB Uncharacterized protein OS=Chlorocebus sabaeus GN=CSRP1 PE=4 SV=1	NaN	2	7	0	7	9
516	>tr|A0A0D9R260|A0A0D9R260_CHLSB Small nuclear ribonucleoprotein-associated protein OS=Chlorocebus sabaeus GN=SNRPN PE=3 SV=1	7	NaN	1	0	7	8
517	>tr|A0A0D9S3E8|A0A0D9S3E8_CHLSB Uncharacterized protein OS=Chlorocebus sabaeus PE=3 SV=1	NaN	1	7	0	7	8
518	>sp|Q2IBA7|CAZA2_CHLAE F-actin-capping protein subunit alpha-2 OS=Chlorocebus aethiops GN=CAPZA2 PE=3 SV=3	NaN	NaN	7	0	7	7
519	>tr|A0A0D9QW25|A0A0D9QW25_CHLSB Uncharacterized protein OS=Chlorocebus sabaeus GN=CCT2 PE=3 SV=1	7	NaN	NaN	0	7	7
520	>tr|A0A0D9QXQ3|A0A0D9QXQ3_CHLSB Uncharacterized protein OS=Chlorocebus sabaeus GN=ANKRD17 PE=4 SV=1	NaN	NaN	7	0	7	7
521	>tr|A0A0D9QYM4|A0A0D9QYM4_CHLSB Uncharacterized protein OS=Chlorocebus sabaeus GN=HNRNPA2B1 PE=4 SV=1	NaN	7	NaN	0	7	7
522	>tr|A0A0D9QZN6|A0A0D9QZN6_CHLSB Uncharacterized protein OS=Chlorocebus sabaeus GN=DPCD PE=4 SV=1	NaN	NaN	7	0	7	7
523	>tr|A0A0D9R013|A0A0D9R013_CHLSB Uncharacterized protein OS=Chlorocebus sabaeus GN=KRT1 PE=3 SV=1	NaN	7	NaN	0	7	7
524	>tr|A0A0D9R2D4|A0A0D9R2D4_CHLSB Uncharacterized protein OS=Chlorocebus sabaeus GN=SUN2 PE=4 SV=1	NaN	NaN	7	0	7	7
525	>tr|A0A0D9R2K9|A0A0D9R2K9_CHLSB Uncharacterized protein OS=Chlorocebus sabaeus GN=EEF1G PE=4 SV=1	NaN	NaN	7	0	7	7
526	>tr|A0A0D9R4R7|A0A0D9R4R7_CHLSB Uncharacterized protein OS=Chlorocebus sabaeus GN=SLC16A9 PE=4 SV=1	7	NaN	NaN	0	7	7
527	>tr|A0A0D9R5T1|A0A0D9R5T1_CHLSB Phosphoserine aminotransferase OS=Chlorocebus sabaeus GN=PSAT1 PE=3 SV=1	NaN	NaN	7	0	7	7
528	>tr|A0A0D9R827|A0A0D9R827_CHLSB Uncharacterized protein OS=Chlorocebus sabaeus GN=YWHAH PE=3 SV=1	7	NaN	NaN	0	7	7
529	>tr|A0A0D9RCW6|A0A0D9RCW6_CHLSB Uncharacterized protein OS=Chlorocebus sabaeus GN=KIAA1671 PE=4 SV=1	NaN	NaN	7	0	7	7
530	>tr|A0A0D9RGP2|A0A0D9RGP2_CHLSB Uncharacterized protein OS=Chlorocebus sabaeus GN=BIRC6 PE=4 SV=1	NaN	NaN	7	0	7	7
531	>tr|A0A0D9RI14|A0A0D9RI14_CHLSB Uncharacterized protein OS=Chlorocebus sabaeus PE=4 SV=1	NaN	7	NaN	0	7	7
532	>tr|A0A0D9RIF2|A0A0D9RIF2_CHLSB Uncharacterized protein OS=Chlorocebus sabaeus GN=MAGED2 PE=4 SV=1	NaN	NaN	7	0	7	7
533	>tr|A0A0D9RKR9|A0A0D9RKR9_CHLSB Proteasome subunit beta type OS=Chlorocebus sabaeus GN=PSMB6 PE=3 SV=1	NaN	7	NaN	0	7	7
534	>tr|A0A0D9RL03|A0A0D9RL03_CHLSB Uncharacterized protein OS=Chlorocebus sabaeus GN=RPA3 PE=4 SV=1	NaN	NaN	7	0	7	7
535	>tr|A0A0D9RLH2|A0A0D9RLH2_CHLSB Uncharacterized protein (Fragment) OS=Chlorocebus sabaeus GN=GSN PE=4 SV=1	NaN	7	NaN	0	7	7
536	>tr|A0A0D9RLU5|A0A0D9RLU5_CHLSB Uncharacterized protein OS=Chlorocebus sabaeus GN=SCAF8 PE=4 SV=1	NaN	NaN	7	0	7	7
537	>tr|A0A0D9RNU2|A0A0D9RNU2_CHLSB Protein phosphatase 1 regulatory subunit OS=Chlorocebus sabaeus GN=PPP1R12B PE=4 SV=1	NaN	NaN	7	0	7	7
538	>tr|A0A0D9RUA5|A0A0D9RUA5_CHLSB L-lactate dehydrogenase (Fragment) OS=Chlorocebus sabaeus PE=3 SV=1	NaN	NaN	7	0	7	7
539	>tr|A0A0D9RUQ5|A0A0D9RUQ5_CHLSB Uncharacterized protein (Fragment) OS=Chlorocebus sabaeus GN=IMMT PE=4 SV=1	NaN	7	NaN	0	7	7
540	>tr|A0A0D9SA63|A0A0D9SA63_CHLSB Uncharacterized protein OS=Chlorocebus sabaeus GN=RPL35 PE=3 SV=1	6	5	6	0	6	17
541	>tr|A0A0D9R2M0|A0A0D9R2M0_CHLSB Uncharacterized protein OS=Chlorocebus sabaeus GN=PRDX2 PE=4 SV=1	6	2	4	0	6	12
542	>tr|A0A0D9R3S5|A0A0D9R3S5_CHLSB Uncharacterized protein OS=Chlorocebus sabaeus GN=ILF3 PE=4 SV=1	NaN	6	5	0	6	11
543	>tr|A0A0D9S8T4|A0A0D9S8T4_CHLSB Uncharacterized protein (Fragment) OS=Chlorocebus sabaeus PE=4 SV=1	5	6	NaN	0	6	11
544	>tr|A0A0D9QXL3|A0A0D9QXL3_CHLSB Uncharacterized protein OS=Chlorocebus sabaeus GN=CFAP20 PE=4 SV=1	3	1	6	0	6	10
545	>tr|A0A0D9R3B0|A0A0D9R3B0_CHLSB Uncharacterized protein OS=Chlorocebus sabaeus GN=BLMH PE=4 SV=1	4	6	NaN	0	6	10
546	>tr|A0A0D9R8S0|A0A0D9R8S0_CHLSB Uncharacterized protein OS=Chlorocebus sabaeus GN=HADHB PE=3 SV=1	NaN	3	6	0	6	9
547	>tr|A0A0D9RFQ0|A0A0D9RFQ0_CHLSB Uncharacterized protein OS=Chlorocebus sabaeus PE=3 SV=1	NaN	3	6	0	6	9
548	>tr|A0A0D9RPC8|A0A0D9RPC8_CHLSB Uncharacterized protein OS=Chlorocebus sabaeus GN=DACT1 PE=4 SV=1	NaN	3	6	0	6	9
549	>sp|Q7YR26|TOP1_CHLAE DNA topoisomerase 1 OS=Chlorocebus aethiops GN=TOP1 PE=2 SV=1	NaN	NaN	6	0	6	6
550	>tr|A0A0D9QVY8|A0A0D9QVY8_CHLSB Protein-tyrosine-phosphatase OS=Chlorocebus sabaeus GN=PTPRB PE=4 SV=1	NaN	6	NaN	0	6	6
551	>tr|A0A0D9QWE5|A0A0D9QWE5_CHLSB Uncharacterized protein OS=Chlorocebus sabaeus GN=PTPN13 PE=4 SV=1	NaN	NaN	6	0	6	6
552	>tr|A0A0D9QXA6|A0A0D9QXA6_CHLSB Uncharacterized protein OS=Chlorocebus sabaeus GN=MICAL2 PE=4 SV=1	6	NaN	NaN	0	6	6
553	>tr|A0A0D9QYL1|A0A0D9QYL1_CHLSB DNA-directed RNA polymerase OS=Chlorocebus sabaeus GN=POLR2B PE=3 SV=1	NaN	NaN	6	0	6	6
554	>tr|A0A0D9R0L3|A0A0D9R0L3_CHLSB Uncharacterized protein OS=Chlorocebus sabaeus GN=NUP160 PE=4 SV=1	6	NaN	NaN	0	6	6
555	>tr|A0A0D9R1R5|A0A0D9R1R5_CHLSB AP complex subunit beta OS=Chlorocebus sabaeus GN=AP2B1 PE=3 SV=1	NaN	NaN	6	0	6	6
556	>tr|A0A0D9R1V0|A0A0D9R1V0_CHLSB Eukaryotic translation initiation factor 3 subunit C OS=Chlorocebus sabaeus GN=EIF3C PE=3 SV=1	NaN	NaN	6	0	6	6
557	>tr|A0A0D9R2K6|A0A0D9R2K6_CHLSB Uncharacterized protein OS=Chlorocebus sabaeus GN=CYFIP1 PE=4 SV=1	NaN	NaN	6	0	6	6
558	>tr|A0A0D9R344|A0A0D9R344_CHLSB Uncharacterized protein OS=Chlorocebus sabaeus GN=STX5 PE=4 SV=1	NaN	NaN	6	0	6	6
559	>tr|A0A0D9R514|A0A0D9R514_CHLSB Uncharacterized protein OS=Chlorocebus sabaeus GN=PCBP3 PE=4 SV=1	NaN	NaN	6	0	6	6
560	>tr|A0A0D9R5T4|A0A0D9R5T4_CHLSB Uncharacterized protein OS=Chlorocebus sabaeus GN=DCDC2 PE=4 SV=1	NaN	NaN	6	0	6	6
561	>tr|A0A0D9R8L5|A0A0D9R8L5_CHLSB Uncharacterized protein OS=Chlorocebus sabaeus GN=YBX3 PE=4 SV=1	NaN	NaN	6	0	6	6
562	>tr|A0A0D9REE8|A0A0D9REE8_CHLSB Uncharacterized protein OS=Chlorocebus sabaeus GN=GEMIN5 PE=4 SV=1	NaN	NaN	6	0	6	6
563	>tr|A0A0D9RFJ8|A0A0D9RFJ8_CHLSB Uncharacterized protein (Fragment) OS=Chlorocebus sabaeus GN=ERCC6L PE=4 SV=1	NaN	NaN	6	0	6	6
564	>tr|A0A0D9RFZ4|A0A0D9RFZ4_CHLSB Chloride anion exchanger OS=Chlorocebus sabaeus GN=SLC26A3 PE=3 SV=1	6	NaN	NaN	0	6	6
565	>tr|A0A0D9RIT2|A0A0D9RIT2_CHLSB Uncharacterized protein OS=Chlorocebus sabaeus GN=POLR2E PE=3 SV=1	NaN	NaN	6	0	6	6
566	>tr|A0A0D9RJC0|A0A0D9RJC0_CHLSB Uncharacterized protein OS=Chlorocebus sabaeus GN=TCP1 PE=3 SV=1	NaN	NaN	6	0	6	6
567	>tr|A0A0D9RLV0|A0A0D9RLV0_CHLSB Uncharacterized protein OS=Chlorocebus sabaeus GN=ZC2HC1A PE=4 SV=1	NaN	NaN	6	0	6	6
568	>tr|A0A0D9RMR7|A0A0D9RMR7_CHLSB Pyruvate kinase OS=Chlorocebus sabaeus PE=3 SV=1	NaN	NaN	6	0	6	6
569	>tr|A0A0D9RNH2|A0A0D9RNH2_CHLSB Uncharacterized protein OS=Chlorocebus sabaeus GN=SRSF6 PE=4 SV=1	6	NaN	NaN	0	6	6
570	>tr|A0A0D9RSM6|A0A0D9RSM6_CHLSB Uncharacterized protein OS=Chlorocebus sabaeus GN=RAB11FIP1 PE=4 SV=1	NaN	NaN	6	0	6	6
571	>tr|A0A0D9RT77|A0A0D9RT77_CHLSB Proteasome subunit alpha type OS=Chlorocebus sabaeus GN=PSMA7 PE=3 SV=1	NaN	NaN	6	0	6	6
572	>tr|A0A0D9RV19|A0A0D9RV19_CHLSB Uncharacterized protein OS=Chlorocebus sabaeus GN=PDLIM2 PE=4 SV=1	NaN	NaN	6	0	6	6
573	>tr|A0A0D9RWB7|A0A0D9RWB7_CHLSB Uncharacterized protein OS=Chlorocebus sabaeus GN=BCLAF1 PE=4 SV=1	NaN	NaN	6	0	6	6
574	>tr|A0A0D9RYK4|A0A0D9RYK4_CHLSB Uncharacterized protein OS=Chlorocebus sabaeus GN=CKAP2 PE=4 SV=1	NaN	NaN	6	0	6	6
575	>tr|A0A0D9S2I7|A0A0D9S2I7_CHLSB Uncharacterized protein OS=Chlorocebus sabaeus GN=CKAP4 PE=4 SV=1	NaN	NaN	6	0	6	6
576	>tr|A0A0D9S3X4|A0A0D9S3X4_CHLSB Uncharacterized protein OS=Chlorocebus sabaeus GN=SCAF1 PE=4 SV=1	NaN	NaN	6	0	6	6
577	>tr|A0A0D9S5G4|A0A0D9S5G4_CHLSB Uncharacterized protein OS=Chlorocebus sabaeus GN=UBAP2L PE=4 SV=1	NaN	NaN	6	0	6	6
578	>tr|A0A0D9S6J3|A0A0D9S6J3_CHLSB Proteasome subunit alpha type OS=Chlorocebus sabaeus GN=PSMA5 PE=3 SV=1	NaN	NaN	6	0	6	6
579	>tr|A0A0D9S7T7|A0A0D9S7T7_CHLSB Proteasome subunit beta type OS=Chlorocebus sabaeus GN=PSMB2 PE=3 SV=1	NaN	NaN	6	0	6	6
580	>tr|A0A0D9S7Z5|A0A0D9S7Z5_CHLSB Uncharacterized protein OS=Chlorocebus sabaeus GN=PUM1 PE=4 SV=1	NaN	NaN	6	0	6	6
581	>tr|A0A0D9S8Q6|A0A0D9S8Q6_CHLSB Uncharacterized protein (Fragment) OS=Chlorocebus sabaeus PE=3 SV=1	6	NaN	NaN	0	6	6
582	>tr|A0A0D9SAW5|A0A0D9SAW5_CHLSB 40S ribosomal protein S12 OS=Chlorocebus sabaeus GN=RPS12 PE=3 SV=1	NaN	NaN	6	0	6	6
583	>tr|A0A0D9SB91|A0A0D9SB91_CHLSB Uncharacterized protein OS=Chlorocebus sabaeus GN=CSNK1A1L PE=4 SV=1	NaN	NaN	6	0	6	6
584	>tr|A0A0D9SDH4|A0A0D9SDH4_CHLSB 60S ribosomal protein L6 OS=Chlorocebus sabaeus PE=3 SV=1	NaN	NaN	6	0	6	6
585	>tr|A0A0D9RIM7|A0A0D9RIM7_CHLSB Uncharacterized protein OS=Chlorocebus sabaeus GN=SRSF7 PE=4 SV=1	5	5	4	0	5	14
586	>tr|A0A0D9RC11|A0A0D9RC11_CHLSB Uncharacterized protein OS=Chlorocebus sabaeus GN=TRAP1 PE=3 SV=1	5	NaN	5	0	5	10
587	>tr|A0A0D9RKN2|A0A0D9RKN2_CHLSB Uncharacterized protein OS=Chlorocebus sabaeus GN=SLC25A13 PE=3 SV=1	NaN	5	5	0	5	10
588	>tr|A0A0D9RAH6|A0A0D9RAH6_CHLSB Uncharacterized protein OS=Chlorocebus sabaeus GN=CTTN PE=4 SV=1	NaN	4	5	0	5	9
589	>tr|A0A0D9S2F4|A0A0D9S2F4_CHLSB Uncharacterized protein OS=Chlorocebus sabaeus GN=KRT9 PE=3 SV=1	5	NaN	3	0	5	8
590	>tr|A0A0D9S958|A0A0D9S958_CHLSB Uncharacterized protein OS=Chlorocebus sabaeus GN=RPL37A PE=3 SV=1	2	1	5	0	5	8
591	>tr|A0A0D9RLZ2|A0A0D9RLZ2_CHLSB Uncharacterized protein OS=Chlorocebus sabaeus GN=ITIH2 PE=4 SV=1	2	5	NaN	0	5	7
592	>tr|A0A0D9QVN1|A0A0D9QVN1_CHLSB Uncharacterized protein OS=Chlorocebus sabaeus PE=4 SV=1	5	NaN	NaN	0	5	5
593	>tr|A0A0D9QVP3|A0A0D9QVP3_CHLSB Uncharacterized protein OS=Chlorocebus sabaeus GN=ARHGEF17 PE=4 SV=1	NaN	NaN	5	0	5	5
594	>tr|A0A0D9QVP9|A0A0D9QVP9_CHLSB Uncharacterized protein OS=Chlorocebus sabaeus GN=FCHSD2 PE=4 SV=1	5	NaN	NaN	0	5	5
595	>tr|A0A0D9QW15|A0A0D9QW15_CHLSB Importin subunit alpha OS=Chlorocebus sabaeus GN=KPNA2 PE=3 SV=1	NaN	NaN	5	0	5	5
596	>tr|A0A0D9QX32|A0A0D9QX32_CHLSB Uncharacterized protein OS=Chlorocebus sabaeus GN=EIF4G2 PE=4 SV=1	NaN	NaN	5	0	5	5
597	>tr|A0A0D9R002|A0A0D9R002_CHLSB Uncharacterized protein OS=Chlorocebus sabaeus GN=MSI2 PE=4 SV=1	NaN	NaN	5	0	5	5
598	>tr|A0A0D9R4W4|A0A0D9R4W4_CHLSB Eukaryotic translation initiation factor 3 subunit G OS=Chlorocebus sabaeus GN=EIF3G PE=3 SV=1	NaN	NaN	5	0	5	5
599	>tr|A0A0D9R6G5|A0A0D9R6G5_CHLSB L-lactate dehydrogenase OS=Chlorocebus sabaeus GN=LDHB PE=3 SV=1	NaN	NaN	5	0	5	5
600	>tr|A0A0D9R7Q1|A0A0D9R7Q1_CHLSB Uncharacterized protein OS=Chlorocebus sabaeus GN=CANX PE=3 SV=1	NaN	5	NaN	0	5	5
601	>tr|A0A0D9R8T2|A0A0D9R8T2_CHLSB Uncharacterized protein OS=Chlorocebus sabaeus GN=SHARPIN PE=4 SV=1	NaN	5	NaN	0	5	5
602	>tr|A0A0D9RAG1|A0A0D9RAG1_CHLSB Uncharacterized protein OS=Chlorocebus sabaeus GN=CEP170 PE=4 SV=1	NaN	NaN	5	0	5	5
603	>tr|A0A0D9RFT6|A0A0D9RFT6_CHLSB Structural maintenance of chromosomes protein OS=Chlorocebus sabaeus GN=SMC2 PE=3 SV=1	NaN	NaN	5	0	5	5
604	>tr|A0A0D9RFW2|A0A0D9RFW2_CHLSB Uncharacterized protein OS=Chlorocebus sabaeus GN=LAMB1 PE=4 SV=1	NaN	NaN	5	0	5	5
605	>tr|A0A0D9RG02|A0A0D9RG02_CHLSB Uncharacterized protein OS=Chlorocebus sabaeus GN=TMOD3 PE=4 SV=1	NaN	NaN	5	0	5	5
606	>tr|A0A0D9RG93|A0A0D9RG93_CHLSB Uncharacterized protein (Fragment) OS=Chlorocebus sabaeus GN=HSPD1 PE=3 SV=1	NaN	NaN	5	0	5	5
607	>tr|A0A0D9RIN4|A0A0D9RIN4_CHLSB Uncharacterized protein OS=Chlorocebus sabaeus GN=LARS PE=3 SV=1	NaN	NaN	5	0	5	5
608	>tr|A0A0D9RIP3|A0A0D9RIP3_CHLSB Uncharacterized protein OS=Chlorocebus sabaeus GN=YLPM1 PE=4 SV=1	NaN	NaN	5	0	5	5
609	>tr|A0A0D9RJE2|A0A0D9RJE2_CHLSB Uncharacterized protein OS=Chlorocebus sabaeus GN=HSD17B10 PE=3 SV=1	NaN	5	NaN	0	5	5
610	>tr|A0A0D9RKC1|A0A0D9RKC1_CHLSB Uncharacterized protein OS=Chlorocebus sabaeus GN=DECR1 PE=4 SV=1	NaN	NaN	5	0	5	5
611	>tr|A0A0D9RLE7|A0A0D9RLE7_CHLSB Uncharacterized protein OS=Chlorocebus sabaeus GN=NDUFA4 PE=4 SV=1	NaN	NaN	5	0	5	5
612	>tr|A0A0D9RLU6|A0A0D9RLU6_CHLSB Uncharacterized protein OS=Chlorocebus sabaeus GN=BAG2 PE=4 SV=1	NaN	NaN	5	0	5	5
613	>tr|A0A0D9RMP0|A0A0D9RMP0_CHLSB Uncharacterized protein OS=Chlorocebus sabaeus PE=3 SV=1	NaN	5	NaN	0	5	5
614	>tr|A0A0D9RPJ9|A0A0D9RPJ9_CHLSB Uncharacterized protein OS=Chlorocebus sabaeus GN=PRDX4 PE=4 SV=1	5	NaN	NaN	0	5	5
615	>tr|A0A0D9RQ73|A0A0D9RQ73_CHLSB T-complex protein 1 subunit delta OS=Chlorocebus sabaeus GN=CCT4 PE=3 SV=1	NaN	NaN	5	0	5	5
616	>tr|A0A0D9RR92|A0A0D9RR92_CHLSB Uncharacterized protein OS=Chlorocebus sabaeus GN=VDAC3 PE=4 SV=1	NaN	NaN	5	0	5	5
617	>tr|A0A0D9RSI9|A0A0D9RSI9_CHLSB Uncharacterized protein OS=Chlorocebus sabaeus GN=ARHGEF28 PE=4 SV=1	NaN	NaN	5	0	5	5
618	>tr|A0A0D9RTY2|A0A0D9RTY2_CHLSB Uncharacterized protein OS=Chlorocebus sabaeus GN=PRPF40A PE=4 SV=1	5	NaN	NaN	0	5	5
619	>tr|A0A0D9RUD9|A0A0D9RUD9_CHLSB Uncharacterized protein OS=Chlorocebus sabaeus GN=TP53BP2 PE=4 SV=1	NaN	NaN	5	0	5	5
620	>tr|A0A0D9RXC2|A0A0D9RXC2_CHLSB Uncharacterized protein OS=Chlorocebus sabaeus GN=AKAP13 PE=4 SV=1	NaN	NaN	5	0	5	5
621	>tr|A0A0D9RXY3|A0A0D9RXY3_CHLSB Uncharacterized protein OS=Chlorocebus sabaeus GN=CCDC127 PE=4 SV=1	NaN	NaN	5	0	5	5
622	>tr|A0A0D9RZH6|A0A0D9RZH6_CHLSB Uncharacterized protein (Fragment) OS=Chlorocebus sabaeus GN=KATNAL2 PE=3 SV=1	5	NaN	NaN	0	5	5
623	>tr|A0A0D9RZS5|A0A0D9RZS5_CHLSB Uncharacterized protein (Fragment) OS=Chlorocebus sabaeus GN=PSPC1 PE=4 SV=1	NaN	NaN	5	0	5	5
624	>tr|A0A0D9RZY9|A0A0D9RZY9_CHLSB Uncharacterized protein OS=Chlorocebus sabaeus GN=MALT1 PE=4 SV=1	NaN	NaN	5	0	5	5
625	>tr|A0A0D9S0C3|A0A0D9S0C3_CHLSB Alpha-1-4 glucan phosphorylase OS=Chlorocebus sabaeus GN=PYGB PE=3 SV=1	5	NaN	NaN	0	5	5
626	>tr|A0A0D9S2G2|A0A0D9S2G2_CHLSB Uncharacterized protein OS=Chlorocebus sabaeus GN=KRT19 PE=3 SV=1	5	NaN	NaN	0	5	5
627	>tr|A0A0D9S2Z3|A0A0D9S2Z3_CHLSB Uncharacterized protein OS=Chlorocebus sabaeus GN=KRT24 PE=4 SV=1	NaN	NaN	5	0	5	5
628	>tr|A0A0D9S405|A0A0D9S405_CHLSB Uncharacterized protein OS=Chlorocebus sabaeus GN=PHB PE=4 SV=1	NaN	NaN	5	0	5	5
629	>tr|A0A0D9S5P4|A0A0D9S5P4_CHLSB Protein S100 OS=Chlorocebus sabaeus GN=S100A8 PE=3 SV=1	5	NaN	NaN	0	5	5
630	>tr|A0A0D9S5T8|A0A0D9S5T8_CHLSB Proteasome subunit beta type OS=Chlorocebus sabaeus GN=PSMB4 PE=3 SV=1	NaN	NaN	5	0	5	5
631	>tr|A0A0D9S711|A0A0D9S711_CHLSB Guanine nucleotide-binding protein subunit gamma OS=Chlorocebus sabaeus GN=GNG12 PE=3 SV=1	NaN	NaN	5	0	5	5
632	>tr|A0A0D9SB63|A0A0D9SB63_CHLSB Uncharacterized protein OS=Chlorocebus sabaeus PE=4 SV=1	NaN	NaN	5	0	5	5
633	>tr|B0LB09|B0LB09_CHLAE CCCH-type zinc finger antiviral protein OS=Chlorocebus aethiops GN=Zc3hav1 PE=2 SV=1	NaN	NaN	5	0	5	5
634	>tr|A0A0D9QZY9|A0A0D9QZY9_CHLSB Uncharacterized protein OS=Chlorocebus sabaeus GN=KRT76 PE=3 SV=1	4	4	4	0	4	12
635	>tr|A0A0D9RME4|A0A0D9RME4_CHLSB Protein kinase C OS=Chlorocebus sabaeus GN=ARAF PE=4 SV=1	4	4	NaN	0	4	8
636	>NSP6 (RRV-12- 92aa):	NaN	4	3	0	4	7
637	>tr|A0A0D9QW47|A0A0D9QW47_CHLSB Uncharacterized protein OS=Chlorocebus sabaeus GN=CPSF6 PE=4 SV=1	4	NaN	3	0	4	7
638	>tr|A0A0D9RD74|A0A0D9RD74_CHLSB Uncharacterized protein OS=Chlorocebus sabaeus PE=4 SV=1	NaN	4	3	0	4	7
639	>tr|A0A0D9RYD7|A0A0D9RYD7_CHLSB Uncharacterized protein OS=Chlorocebus sabaeus GN=MYL12B PE=4 SV=1	NaN	4	3	0	4	7
640	>tr|A0A0D9S7Q4|A0A0D9S7Q4_CHLSB Uncharacterized protein OS=Chlorocebus sabaeus GN=SF3A3 PE=4 SV=1	3	4	NaN	0	4	7
641	>tr|A0A0D9R1G1|A0A0D9R1G1_CHLSB Uncharacterized protein OS=Chlorocebus sabaeus GN=TUBA1A PE=3 SV=1	4	NaN	2	0	4	6
642	>tr|A0A0D9R878|A0A0D9R878_CHLSB Uncharacterized protein OS=Chlorocebus sabaeus GN=TBC1D10C PE=4 SV=1	4	2	NaN	0	4	6
643	>tr|A0A0D9RUT2|A0A0D9RUT2_CHLSB Uncharacterized protein OS=Chlorocebus sabaeus GN=DARS PE=3 SV=1	NaN	2	4	0	4	6
644	>tr|A0A0D9S2G3|A0A0D9S2G3_CHLSB Uncharacterized protein OS=Chlorocebus sabaeus GN=KRT15 PE=3 SV=1	2	NaN	4	0	4	6
645	>tr|A0A0D9SDH3|A0A0D9SDH3_CHLSB Uncharacterized protein OS=Chlorocebus sabaeus GN=RPL10L PE=4 SV=1	NaN	4	2	0	4	6
646	>sp|Q95JF4|DNAJ1_CHLAE DnaJ homolog subfamily A member 1 OS=Chlorocebus aethiops GN=DNAJA1 PE=2 SV=1	NaN	NaN	4	0	4	4
647	>tr|A0A0D9QW77|A0A0D9QW77_CHLSB Uncharacterized protein OS=Chlorocebus sabaeus GN=IST1 PE=4 SV=1	NaN	NaN	4	0	4	4
648	>tr|A0A0D9QXS8|A0A0D9QXS8_CHLSB Uncharacterized protein (Fragment) OS=Chlorocebus sabaeus PE=4 SV=1	NaN	NaN	4	0	4	4
649	>tr|A0A0D9QYU3|A0A0D9QYU3_CHLSB Uncharacterized protein OS=Chlorocebus sabaeus GN=LIN7C PE=4 SV=1	NaN	NaN	4	0	4	4
650	>tr|A0A0D9QZ04|A0A0D9QZ04_CHLSB Uncharacterized protein OS=Chlorocebus sabaeus GN=CDK2 PE=4 SV=1	NaN	NaN	4	0	4	4
651	>tr|A0A0D9QZM2|A0A0D9QZM2_CHLSB Uncharacterized protein OS=Chlorocebus sabaeus GN=MAP1S PE=4 SV=1	NaN	NaN	4	0	4	4
652	>tr|A0A0D9R279|A0A0D9R279_CHLSB Uncharacterized protein OS=Chlorocebus sabaeus GN=DNAJB6 PE=4 SV=1	NaN	NaN	4	0	4	4
653	>tr|A0A0D9R4H6|A0A0D9R4H6_CHLSB Uncharacterized protein OS=Chlorocebus sabaeus GN=TUBB2A PE=3 SV=1	NaN	4	NaN	0	4	4
654	>tr|A0A0D9R4I0|A0A0D9R4I0_CHLSB Uncharacterized protein OS=Chlorocebus sabaeus GN=SPTLC1 PE=4 SV=1	NaN	NaN	4	0	4	4
655	>tr|A0A0D9R4V8|A0A0D9R4V8_CHLSB DNA (cytosine-5)-methyltransferase OS=Chlorocebus sabaeus GN=DNMT1 PE=3 SV=1	NaN	NaN	4	0	4	4
656	>tr|A0A0D9R5X8|A0A0D9R5X8_CHLSB Uncharacterized protein OS=Chlorocebus sabaeus GN=HPRT1 PE=4 SV=1	NaN	NaN	4	0	4	4
657	>tr|A0A0D9R8Q5|A0A0D9R8Q5_CHLSB RNA binding protein fox-1 homolog OS=Chlorocebus sabaeus GN=RBFOX1 PE=4 SV=1	NaN	NaN	4	0	4	4
658	>tr|A0A0D9R949|A0A0D9R949_CHLSB Uncharacterized protein OS=Chlorocebus sabaeus GN=PUF60 PE=4 SV=1	NaN	NaN	4	0	4	4
659	>tr|A0A0D9REE9|A0A0D9REE9_CHLSB Uncharacterized protein OS=Chlorocebus sabaeus GN=TMCO1 PE=4 SV=1	NaN	NaN	4	0	4	4
660	>tr|A0A0D9REM0|A0A0D9REM0_CHLSB Small nuclear ribonucleoprotein-associated protein OS=Chlorocebus sabaeus GN=SNRPB PE=3 SV=1	NaN	4	NaN	0	4	4
661	>tr|A0A0D9RGB3|A0A0D9RGB3_CHLSB Uncharacterized protein OS=Chlorocebus sabaeus GN=HLTF PE=4 SV=1	NaN	NaN	4	0	4	4
662	>tr|A0A0D9RH35|A0A0D9RH35_CHLSB Uncharacterized protein OS=Chlorocebus sabaeus GN=PSMC2 PE=3 SV=1	4	NaN	NaN	0	4	4
663	>tr|A0A0D9RHM1|A0A0D9RHM1_CHLSB Uncharacterized protein OS=Chlorocebus sabaeus GN=CGNL1 PE=4 SV=1	NaN	NaN	4	0	4	4
664	>tr|A0A0D9RIB0|A0A0D9RIB0_CHLSB Uncharacterized protein OS=Chlorocebus sabaeus GN=DPYSL3 PE=4 SV=1	NaN	NaN	4	0	4	4
665	>tr|A0A0D9RK24|A0A0D9RK24_CHLSB Uncharacterized protein OS=Chlorocebus sabaeus GN=RBM25 PE=4 SV=1	NaN	4	NaN	0	4	4
666	>tr|A0A0D9RKP7|A0A0D9RKP7_CHLSB Uncharacterized protein OS=Chlorocebus sabaeus GN=LRPPRC PE=4 SV=1	NaN	NaN	4	0	4	4
667	>tr|A0A0D9RKV5|A0A0D9RKV5_CHLSB Enhancer of rudimentary homolog OS=Chlorocebus sabaeus GN=ERH PE=3 SV=1	NaN	NaN	4	0	4	4
668	>tr|A0A0D9RLK1|A0A0D9RLK1_CHLSB Uncharacterized protein OS=Chlorocebus sabaeus GN=EIF2S1 PE=4 SV=1	NaN	NaN	4	0	4	4
669	>tr|A0A0D9RM57|A0A0D9RM57_CHLSB Proteasome subunit beta type OS=Chlorocebus sabaeus GN=PSMB7 PE=3 SV=1	NaN	NaN	4	0	4	4
670	>tr|A0A0D9RQX3|A0A0D9RQX3_CHLSB Uncharacterized protein OS=Chlorocebus sabaeus GN=SRGAP2 PE=4 SV=1	NaN	NaN	4	0	4	4
671	>tr|A0A0D9RS60|A0A0D9RS60_CHLSB Uncharacterized protein OS=Chlorocebus sabaeus GN=GAK PE=4 SV=1	NaN	NaN	4	0	4	4
672	>tr|A0A0D9RS97|A0A0D9RS97_CHLSB Proteasome subunit alpha type OS=Chlorocebus sabaeus GN=PSMA2 PE=3 SV=1	NaN	NaN	4	0	4	4
673	>tr|A0A0D9RSY4|A0A0D9RSY4_CHLSB Uncharacterized protein (Fragment) OS=Chlorocebus sabaeus PE=4 SV=1	NaN	4	NaN	0	4	4
674	>tr|A0A0D9RUF1|A0A0D9RUF1_CHLSB S-adenosylmethionine synthase OS=Chlorocebus sabaeus GN=MAT2A PE=3 SV=1	NaN	NaN	4	0	4	4
675	>tr|A0A0D9RUP9|A0A0D9RUP9_CHLSB Uncharacterized protein OS=Chlorocebus sabaeus GN=YTHDF1 PE=4 SV=1	NaN	NaN	4	0	4	4
676	>tr|A0A0D9RY49|A0A0D9RY49_CHLSB Uncharacterized protein OS=Chlorocebus sabaeus GN=TUBB6 PE=3 SV=1	NaN	NaN	4	0	4	4
677	>tr|A0A0D9RYZ3|A0A0D9RYZ3_CHLSB Uncharacterized protein OS=Chlorocebus sabaeus GN=CYP3A5 PE=3 SV=1	NaN	NaN	4	0	4	4
678	>tr|A0A0D9RZ41|A0A0D9RZ41_CHLSB Uncharacterized protein OS=Chlorocebus sabaeus GN=DSG2 PE=4 SV=1	NaN	NaN	4	0	4	4
679	>tr|A0A0D9S024|A0A0D9S024_CHLSB Uncharacterized protein OS=Chlorocebus sabaeus GN=RFC2 PE=4 SV=1	NaN	NaN	4	0	4	4
680	>tr|A0A0D9S0P0|A0A0D9S0P0_CHLSB Uncharacterized protein OS=Chlorocebus sabaeus GN=GFAP PE=3 SV=1	NaN	NaN	4	0	4	4
681	>tr|A0A0D9S407|A0A0D9S407_CHLSB Uncharacterized protein OS=Chlorocebus sabaeus GN=AP2A1 PE=4 SV=1	NaN	NaN	4	0	4	4
682	>tr|A0A0D9S478|A0A0D9S478_CHLSB Uncharacterized protein OS=Chlorocebus sabaeus GN=MSANTD2 PE=4 SV=1	4	NaN	NaN	0	4	4
683	>tr|A0A0D9S4G6|A0A0D9S4G6_CHLSB Uncharacterized protein OS=Chlorocebus sabaeus GN=CIT PE=4 SV=1	NaN	NaN	4	0	4	4
684	>tr|A0A0D9S6G0|A0A0D9S6G0_CHLSB Uncharacterized protein OS=Chlorocebus sabaeus GN=ATP5F1 PE=4 SV=1	NaN	NaN	4	0	4	4
685	>tr|A0A0D9SDA4|A0A0D9SDA4_CHLSB Uncharacterized protein OS=Chlorocebus sabaeus GN=RBMXL2 PE=4 SV=1	NaN	NaN	4	0	4	4
686	>tr|A0A0D9SDK1|A0A0D9SDK1_CHLSB Uncharacterized protein (Fragment) OS=Chlorocebus sabaeus PE=4 SV=1	NaN	NaN	4	0	4	4
687	>tr|A0A0D9SE08|A0A0D9SE08_CHLSB Uncharacterized protein OS=Chlorocebus sabaeus GN=PURB PE=4 SV=1	NaN	NaN	4	0	4	4
688	>tr|A0A0D9QWU2|A0A0D9QWU2_CHLSB Uncharacterized protein OS=Chlorocebus sabaeus GN=SBSN PE=4 SV=1	3	3	NaN	0	3	6
689	>tr|A0A0D9RMU1|A0A0D9RMU1_CHLSB Uncharacterized protein OS=Chlorocebus sabaeus GN=IGLV1-51 PE=4 SV=1	NaN	3	3	0	3	6
690	>sp|Q2L9X0|RSSA_CHLAE 40S ribosomal protein SA OS=Chlorocebus aethiops GN=RPSA PE=2 SV=3	NaN	2	3	0	3	5
691	>tr|A0A0D9QV99|A0A0D9QV99_CHLSB Uncharacterized protein OS=Chlorocebus sabaeus GN=PSMC5 PE=3 SV=1	NaN	2	3	0	3	5
692	>tr|A0A0D9RBS5|A0A0D9RBS5_CHLSB Uncharacterized protein OS=Chlorocebus sabaeus GN=EWSR1 PE=4 SV=1	1	1	3	0	3	5
693	>tr|A0A0D9RF51|A0A0D9RF51_CHLSB Coronin OS=Chlorocebus sabaeus GN=CORO2A PE=3 SV=1	NaN	2	3	0	3	5
694	>tr|A0A0D9RB46|A0A0D9RB46_CHLSB Uncharacterized protein OS=Chlorocebus sabaeus GN=TUBB4A PE=3 SV=1	NaN	1	3	0	3	4
695	>tr|A0A0D9RVC2|A0A0D9RVC2_CHLSB Uncharacterized protein OS=Chlorocebus sabaeus PE=4 SV=1	3	1	NaN	0	3	4
696	>tr|A0A0D9QVE7|A0A0D9QVE7_CHLSB Uncharacterized protein (Fragment) OS=Chlorocebus sabaeus GN=NAV3 PE=4 SV=1	NaN	NaN	3	0	3	3
697	>tr|A0A0D9QVJ4|A0A0D9QVJ4_CHLSB Eukaryotic translation initiation factor 3 subunit K OS=Chlorocebus sabaeus GN=EIF3K PE=3 SV=1	NaN	NaN	3	0	3	3
698	>tr|A0A0D9QW67|A0A0D9QW67_CHLSB Uncharacterized protein OS=Chlorocebus sabaeus GN=TBCB PE=4 SV=1	NaN	NaN	3	0	3	3
699	>tr|A0A0D9QYF9|A0A0D9QYF9_CHLSB Uncharacterized protein OS=Chlorocebus sabaeus GN=NDUFA13 PE=4 SV=1	NaN	NaN	3	0	3	3
700	>tr|A0A0D9QZD3|A0A0D9QZD3_CHLSB Uncharacterized protein OS=Chlorocebus sabaeus GN=LRRC59 PE=4 SV=1	NaN	NaN	3	0	3	3
701	>tr|A0A0D9R0Z6|A0A0D9R0Z6_CHLSB Glycerol-3-phosphate dehydrogenase [NAD(+)] OS=Chlorocebus sabaeus GN=GPD1 PE=3 SV=1	3	NaN	NaN	0	3	3
702	>tr|A0A0D9R3H4|A0A0D9R3H4_CHLSB Uncharacterized protein OS=Chlorocebus sabaeus GN=SSR4 PE=4 SV=1	NaN	NaN	3	0	3	3
703	>tr|A0A0D9R6B6|A0A0D9R6B6_CHLSB Eukaryotic translation initiation factor 3 subunit D OS=Chlorocebus sabaeus GN=EIF3D PE=3 SV=1	NaN	NaN	3	0	3	3
704	>tr|A0A0D9R8J7|A0A0D9R8J7_CHLSB Uncharacterized protein OS=Chlorocebus sabaeus GN=DNAJC9 PE=4 SV=1	NaN	NaN	3	0	3	3
705	>tr|A0A0D9R8M6|A0A0D9R8M6_CHLSB Uncharacterized protein OS=Chlorocebus sabaeus GN=RUNX1 PE=4 SV=1	NaN	NaN	3	0	3	3
706	>tr|A0A0D9R8X3|A0A0D9R8X3_CHLSB Uncharacterized protein OS=Chlorocebus sabaeus GN=RQCD1 PE=4 SV=1	NaN	NaN	3	0	3	3
707	>tr|A0A0D9RA47|A0A0D9RA47_CHLSB Uncharacterized protein OS=Chlorocebus sabaeus GN=CDHR2 PE=4 SV=1	NaN	3	NaN	0	3	3
708	>tr|A0A0D9RB24|A0A0D9RB24_CHLSB Uncharacterized protein OS=Chlorocebus sabaeus GN=NAP1L4 PE=3 SV=1	NaN	NaN	3	0	3	3
709	>tr|A0A0D9RB41|A0A0D9RB41_CHLSB Protein argonaute-2 OS=Chlorocebus sabaeus GN=AGO2 PE=3 SV=1	NaN	NaN	3	0	3	3
710	>tr|A0A0D9RCP3|A0A0D9RCP3_CHLSB Uncharacterized protein OS=Chlorocebus sabaeus GN=TRAF3 PE=4 SV=1	NaN	3	NaN	0	3	3
711	>tr|A0A0D9RED4|A0A0D9RED4_CHLSB Uncharacterized protein OS=Chlorocebus sabaeus GN=MRPL22 PE=3 SV=1	NaN	NaN	3	0	3	3
712	>tr|A0A0D9RFZ5|A0A0D9RFZ5_CHLSB Uncharacterized protein OS=Chlorocebus sabaeus GN=SPATS2L PE=4 SV=1	NaN	NaN	3	0	3	3
713	>tr|A0A0D9RGR4|A0A0D9RGR4_CHLSB Kinesin-like protein OS=Chlorocebus sabaeus GN=KIF5B PE=3 SV=1	3	NaN	NaN	0	3	3
714	>tr|A0A0D9RI83|A0A0D9RI83_CHLSB Uncharacterized protein OS=Chlorocebus sabaeus GN=EIF2S2 PE=4 SV=1	NaN	NaN	3	0	3	3
715	>tr|A0A0D9RIR4|A0A0D9RIR4_CHLSB Uncharacterized protein OS=Chlorocebus sabaeus GN=PTBP3 PE=4 SV=1	NaN	NaN	3	0	3	3
716	>tr|A0A0D9RK34|A0A0D9RK34_CHLSB Uncharacterized protein OS=Chlorocebus sabaeus GN=FNDC3B PE=4 SV=1	NaN	NaN	3	0	3	3
717	>tr|A0A0D9RM49|A0A0D9RM49_CHLSB Uncharacterized protein OS=Chlorocebus sabaeus GN=STAU2 PE=4 SV=1	NaN	NaN	3	0	3	3
718	>tr|A0A0D9RMJ8|A0A0D9RMJ8_CHLSB Uncharacterized protein OS=Chlorocebus sabaeus GN=RPN2 PE=4 SV=1	NaN	NaN	3	0	3	3
719	>tr|A0A0D9RMT3|A0A0D9RMT3_CHLSB Uncharacterized protein OS=Chlorocebus sabaeus PE=4 SV=1	NaN	3	NaN	0	3	3
720	>tr|A0A0D9RQQ3|A0A0D9RQQ3_CHLSB Uncharacterized protein OS=Chlorocebus sabaeus GN=FAM78A PE=4 SV=1	NaN	3	NaN	0	3	3
721	>tr|A0A0D9RR51|A0A0D9RR51_CHLSB Uncharacterized protein OS=Chlorocebus sabaeus GN=PSMC6 PE=3 SV=1	3	NaN	NaN	0	3	3
722	>tr|A0A0D9RR53|A0A0D9RR53_CHLSB Uncharacterized protein OS=Chlorocebus sabaeus GN=GFPT1 PE=4 SV=1	NaN	NaN	3	0	3	3
723	>tr|A0A0D9RRI0|A0A0D9RRI0_CHLSB Uncharacterized protein OS=Chlorocebus sabaeus GN=DHFR PE=3 SV=1	NaN	NaN	3	0	3	3
724	>tr|A0A0D9RRS2|A0A0D9RRS2_CHLSB Uncharacterized protein OS=Chlorocebus sabaeus GN=ATP6V1B1 PE=3 SV=1	3	NaN	NaN	0	3	3
725	>tr|A0A0D9RVC3|A0A0D9RVC3_CHLSB Uncharacterized protein OS=Chlorocebus sabaeus GN=SUPT16H PE=4 SV=1	NaN	NaN	3	0	3	3
726	>tr|A0A0D9RVK4|A0A0D9RVK4_CHLSB Uncharacterized protein OS=Chlorocebus sabaeus GN=HNRNPC PE=4 SV=1	NaN	NaN	3	0	3	3
727	>tr|A0A0D9RVV7|A0A0D9RVV7_CHLSB Uncharacterized protein OS=Chlorocebus sabaeus GN=CLASP1 PE=4 SV=1	NaN	NaN	3	0	3	3
728	>tr|A0A0D9RWF4|A0A0D9RWF4_CHLSB Uncharacterized protein OS=Chlorocebus sabaeus GN=CTNNB1 PE=4 SV=1	NaN	3	NaN	0	3	3
729	>tr|A0A0D9RWJ3|A0A0D9RWJ3_CHLSB Uncharacterized protein OS=Chlorocebus sabaeus GN=RPL9 PE=4 SV=1	NaN	NaN	3	0	3	3
730	>tr|A0A0D9RXD9|A0A0D9RXD9_CHLSB Signal peptidase complex catalytic subunit SEC11 OS=Chlorocebus sabaeus GN=SEC11A PE=3 SV=1	NaN	NaN	3	0	3	3
731	>tr|A0A0D9RY48|A0A0D9RY48_CHLSB Uncharacterized protein OS=Chlorocebus sabaeus GN=AFG3L2 PE=3 SV=1	NaN	3	NaN	0	3	3
732	>tr|A0A0D9RZ59|A0A0D9RZ59_CHLSB Uncharacterized protein OS=Chlorocebus sabaeus GN=SPG20 PE=4 SV=1	NaN	NaN	3	0	3	3
733	>tr|A0A0D9RZ78|A0A0D9RZ78_CHLSB Uncharacterized protein OS=Chlorocebus sabaeus GN=RFC3 PE=4 SV=1	NaN	NaN	3	0	3	3
734	>tr|A0A0D9S294|A0A0D9S294_CHLSB Uncharacterized protein OS=Chlorocebus sabaeus GN=HSP90B1 PE=3 SV=1	3	NaN	NaN	0	3	3
735	>tr|A0A0D9S2C1|A0A0D9S2C1_CHLSB Uncharacterized protein OS=Chlorocebus sabaeus GN=CDKN2AIP PE=4 SV=1	NaN	NaN	3	0	3	3
736	>tr|A0A0D9S2I6|A0A0D9S2I6_CHLSB Uncharacterized protein OS=Chlorocebus sabaeus GN=NUAK1 PE=4 SV=1	NaN	NaN	3	0	3	3
737	>tr|A0A0D9S338|A0A0D9S338_CHLSB Uncharacterized protein OS=Chlorocebus sabaeus GN=RUVBL2 PE=4 SV=1	NaN	NaN	3	0	3	3
738	>tr|A0A0D9S3I3|A0A0D9S3I3_CHLSB Serine/threonine-protein phosphatase OS=Chlorocebus sabaeus GN=PPP1CC PE=3 SV=1	NaN	NaN	3	0	3	3
739	>tr|A0A0D9S3W7|A0A0D9S3W7_CHLSB Uncharacterized protein OS=Chlorocebus sabaeus PE=4 SV=1	NaN	NaN	3	0	3	3
740	>tr|A0A0D9S7J3|A0A0D9S7J3_CHLSB Uncharacterized protein OS=Chlorocebus sabaeus GN=CDC20 PE=4 SV=1	NaN	NaN	3	0	3	3
741	>tr|A0A0D9S7M1|A0A0D9S7M1_CHLSB CTP synthase OS=Chlorocebus sabaeus GN=CTPS1 PE=3 SV=1	NaN	NaN	3	0	3	3
742	>tr|A0A0D9S897|A0A0D9S897_CHLSB Uncharacterized protein OS=Chlorocebus sabaeus GN=HNRNPR PE=4 SV=1	NaN	NaN	3	0	3	3
743	>tr|A0A0D9S9G5|A0A0D9S9G5_CHLSB Uncharacterized protein OS=Chlorocebus sabaeus GN=CDK1 PE=4 SV=1	NaN	NaN	3	0	3	3
744	>tr|A0A0D9SCC3|A0A0D9SCC3_CHLSB Uncharacterized protein OS=Chlorocebus sabaeus GN=PSMC1 PE=3 SV=1	3	NaN	NaN	0	3	3
745	>tr|A0A0D9SCQ7|A0A0D9SCQ7_CHLSB Uncharacterized protein OS=Chlorocebus sabaeus PE=4 SV=1	NaN	NaN	3	0	3	3
746	>tr|A0A0D9QZ87|A0A0D9QZ87_CHLSB Uncharacterized protein OS=Chlorocebus sabaeus GN=DCD PE=4 SV=1	2	2	2	0	2	6
747	>tr|A0A0D9RE84|A0A0D9RE84_CHLSB Uncharacterized protein OS=Chlorocebus sabaeus GN=SNRPD3 PE=4 SV=1	NaN	2	2	0	2	4
748	>tr|A0A0D9QUH9|A0A0D9QUH9_CHLSB Uncharacterized protein OS=Chlorocebus sabaeus GN=SNRPA PE=4 SV=1	NaN	2	1	0	2	3
749	>sp|P67988|PRIO_CHLAE Major prion protein OS=Chlorocebus aethiops GN=PRNP PE=3 SV=1	NaN	NaN	2	0	2	2
750	>sp|Q2IBA5|CAV1_CHLAE Caveolin-1 OS=Chlorocebus aethiops GN=CAV1 PE=3 SV=1	NaN	NaN	2	0	2	2
751	>sp|Q9MZE0|C1QBP_CHLAE Complement component 1 Q subcomponent-binding protein- mitochondrial OS=Chlorocebus aethiops GN=C1QBP PE=1 SV=2	NaN	2	NaN	0	2	2
752	>tr|A0A0D9QVU1|A0A0D9QVU1_CHLSB Uncharacterized protein OS=Chlorocebus sabaeus GN=EIF4E PE=3 SV=1	NaN	NaN	2	0	2	2
753	>tr|A0A0D9QWM7|A0A0D9QWM7_CHLSB Eukaryotic translation initiation factor 3 subunit F OS=Chlorocebus sabaeus GN=EIF3F PE=3 SV=1	NaN	NaN	2	0	2	2
754	>tr|A0A0D9R014|A0A0D9R014_CHLSB Uncharacterized protein OS=Chlorocebus sabaeus GN=SRSF1 PE=4 SV=1	NaN	NaN	2	0	2	2
755	>tr|A0A0D9R1Y8|A0A0D9R1Y8_CHLSB Uncharacterized protein OS=Chlorocebus sabaeus GN=GIPC1 PE=4 SV=1	2	NaN	NaN	0	2	2
756	>tr|A0A0D9R360|A0A0D9R360_CHLSB Uncharacterized protein OS=Chlorocebus sabaeus GN=EMD PE=4 SV=1	NaN	NaN	2	0	2	2
757	>tr|A0A0D9R4H8|A0A0D9R4H8_CHLSB Uncharacterized protein OS=Chlorocebus sabaeus GN=TUBB2B PE=3 SV=1	NaN	NaN	2	0	2	2
758	>tr|A0A0D9R7Z4|A0A0D9R7Z4_CHLSB Uncharacterized protein OS=Chlorocebus sabaeus GN=HNRNPK PE=4 SV=1	NaN	NaN	2	0	2	2
759	>tr|A0A0D9R963|A0A0D9R963_CHLSB Uncharacterized protein OS=Chlorocebus sabaeus GN=SYNPO2L PE=4 SV=1	2	NaN	NaN	0	2	2
760	>tr|A0A0D9R9F0|A0A0D9R9F0_CHLSB Uncharacterized protein OS=Chlorocebus sabaeus GN=TNS1 PE=4 SV=1	NaN	2	NaN	0	2	2
761	>tr|A0A0D9RAA7|A0A0D9RAA7_CHLSB DNA-directed RNA polymerase OS=Chlorocebus sabaeus GN=POLR3A PE=3 SV=1	2	NaN	NaN	0	2	2
762	>tr|A0A0D9RAE7|A0A0D9RAE7_CHLSB Uncharacterized protein (Fragment) OS=Chlorocebus sabaeus PE=4 SV=1	NaN	NaN	2	0	2	2
763	>tr|A0A0D9RCN6|A0A0D9RCN6_CHLSB Uncharacterized protein OS=Chlorocebus sabaeus GN=DCTN3 PE=4 SV=1	NaN	NaN	2	0	2	2
764	>tr|A0A0D9RH26|A0A0D9RH26_CHLSB Uncharacterized protein OS=Chlorocebus sabaeus GN=SF3A2 PE=4 SV=1	2	NaN	NaN	0	2	2
765	>tr|A0A0D9RIX6|A0A0D9RIX6_CHLSB Uncharacterized protein OS=Chlorocebus sabaeus GN=MTDH PE=4 SV=1	NaN	NaN	2	0	2	2
766	>tr|A0A0D9RIY7|A0A0D9RIY7_CHLSB Syndecan (Fragment) OS=Chlorocebus sabaeus GN=SDC2 PE=3 SV=1	NaN	NaN	2	0	2	2
767	>tr|A0A0D9RM73|A0A0D9RM73_CHLSB Uncharacterized protein OS=Chlorocebus sabaeus PE=4 SV=1	2	NaN	NaN	0	2	2
768	>tr|A0A0D9RNG4|A0A0D9RNG4_CHLSB Uncharacterized protein OS=Chlorocebus sabaeus GN=IGF2BP2 PE=4 SV=1	NaN	NaN	2	0	2	2
769	>tr|A0A0D9RPH9|A0A0D9RPH9_CHLSB Alpha-mannosidase OS=Chlorocebus sabaeus GN=MAN2C1 PE=3 SV=1	NaN	NaN	2	0	2	2
770	>tr|A0A0D9RQJ9|A0A0D9RQJ9_CHLSB Uncharacterized protein OS=Chlorocebus sabaeus GN=AIM1 PE=4 SV=1	NaN	NaN	2	0	2	2
771	>tr|A0A0D9RS41|A0A0D9RS41_CHLSB Uncharacterized protein OS=Chlorocebus sabaeus GN=STK39 PE=4 SV=1	NaN	NaN	2	0	2	2
772	>tr|A0A0D9RSR7|A0A0D9RSR7_CHLSB Uncharacterized protein OS=Chlorocebus sabaeus GN=NPEPL1 PE=4 SV=1	2	NaN	NaN	0	2	2
773	>tr|A0A0D9RTF7|A0A0D9RTF7_CHLSB Uncharacterized protein OS=Chlorocebus sabaeus GN=INPP5E PE=4 SV=1	NaN	NaN	2	0	2	2
774	>tr|A0A0D9RU02|A0A0D9RU02_CHLSB Uncharacterized protein OS=Chlorocebus sabaeus GN=AFAP1 PE=4 SV=1	NaN	NaN	2	0	2	2
775	>tr|A0A0D9RVI2|A0A0D9RVI2_CHLSB Uncharacterized protein OS=Chlorocebus sabaeus PE=4 SV=1	NaN	2	NaN	0	2	2
776	>tr|A0A0D9RX36|A0A0D9RX36_CHLSB Uncharacterized protein OS=Chlorocebus sabaeus GN=RAI14 PE=4 SV=1	NaN	2	NaN	0	2	2
777	>tr|A0A0D9RYA8|A0A0D9RYA8_CHLSB Uncharacterized protein OS=Chlorocebus sabaeus GN=RAB12 PE=4 SV=1	NaN	NaN	2	0	2	2
778	>tr|A0A0D9RZ28|A0A0D9RZ28_CHLSB DNA helicase OS=Chlorocebus sabaeus GN=MCM7 PE=3 SV=1	NaN	NaN	2	0	2	2
779	>tr|A0A0D9RZJ4|A0A0D9RZJ4_CHLSB Uncharacterized protein OS=Chlorocebus sabaeus GN=AP1S1 PE=4 SV=1	NaN	NaN	2	0	2	2
780	>tr|A0A0D9S150|A0A0D9S150_CHLSB Uncharacterized protein OS=Chlorocebus sabaeus GN=PAFAH1B3 PE=4 SV=1	NaN	NaN	2	0	2	2
781	>tr|A0A0D9S2Q6|A0A0D9S2Q6_CHLSB Uncharacterized protein OS=Chlorocebus sabaeus GN=APRT PE=3 SV=1	NaN	NaN	2	0	2	2
782	>tr|A0A0D9S323|A0A0D9S323_CHLSB Uncharacterized protein OS=Chlorocebus sabaeus GN=CDC6 PE=4 SV=1	NaN	NaN	2	0	2	2
783	>tr|A0A0D9S429|A0A0D9S429_CHLSB Uncharacterized protein OS=Chlorocebus sabaeus GN=PNKP PE=4 SV=1	NaN	NaN	2	0	2	2
784	>tr|A0A0D9S5M6|A0A0D9S5M6_CHLSB Uncharacterized protein (Fragment) OS=Chlorocebus sabaeus GN=ILF2 PE=4 SV=1	NaN	NaN	2	0	2	2
785	>tr|A0A0D9S854|A0A0D9S854_CHLSB Uncharacterized protein OS=Chlorocebus sabaeus GN=ZNF593 PE=4 SV=1	NaN	NaN	2	0	2	2
786	>tr|A0A0D9SDV2|A0A0D9SDV2_CHLSB Uncharacterized protein OS=Chlorocebus sabaeus PE=3 SV=1	NaN	NaN	2	0	2	2
787	>tr|D9MWX4|D9MWX4_CHLAE Non-muscle myosin IIA (Fragment) OS=Chlorocebus aethiops PE=2 SV=1	NaN	2	NaN	0	2	2
788	>sp|P26455|COX2_CHLAE Cytochrome c oxidase subunit 2 OS=Chlorocebus aethiops GN=MT-CO2 PE=3 SV=1	NaN	1	NaN	0	1	1
789	>tr|A0A0D9QWZ1|A0A0D9QWZ1_CHLSB Uncharacterized protein OS=Chlorocebus sabaeus GN=BUB3 PE=4 SV=1	NaN	NaN	1	0	1	1
790	>tr|A0A0D9QXF7|A0A0D9QXF7_CHLSB Proteasome subunit alpha type OS=Chlorocebus sabaeus PE=3 SV=1	NaN	NaN	1	0	1	1
791	>tr|A0A0D9QXG7|A0A0D9QXG7_CHLSB Uncharacterized protein OS=Chlorocebus sabaeus GN=MRPS7 PE=4 SV=1	NaN	NaN	1	0	1	1
792	>tr|A0A0D9QYF8|A0A0D9QYF8_CHLSB Uncharacterized protein OS=Chlorocebus sabaeus GN=RBMS2 PE=4 SV=1	NaN	NaN	1	0	1	1
793	>tr|A0A0D9QZK2|A0A0D9QZK2_CHLSB Uncharacterized protein (Fragment) OS=Chlorocebus sabaeus GN=TRAF6 PE=4 SV=1	NaN	1	NaN	0	1	1
794	>tr|A0A0D9R0W0|A0A0D9R0W0_CHLSB Uncharacterized protein OS=Chlorocebus sabaeus GN=SSRP1 PE=4 SV=1	NaN	NaN	1	0	1	1
795	>tr|A0A0D9R122|A0A0D9R122_CHLSB Uncharacterized protein OS=Chlorocebus sabaeus GN=CA4 PE=4 SV=1	1	NaN	NaN	0	1	1
796	>tr|A0A0D9R1Q7|A0A0D9R1Q7_CHLSB Uncharacterized protein OS=Chlorocebus sabaeus GN=PRPF19 PE=4 SV=1	NaN	NaN	1	0	1	1
797	>tr|A0A0D9R272|A0A0D9R272_CHLSB Uncharacterized protein OS=Chlorocebus sabaeus GN=CPSF7 PE=4 SV=1	NaN	NaN	1	0	1	1
798	>tr|A0A0D9R314|A0A0D9R314_CHLSB Uncharacterized protein OS=Chlorocebus sabaeus GN=POLR2G PE=4 SV=1	NaN	NaN	1	0	1	1
799	>tr|A0A0D9R3E5|A0A0D9R3E5_CHLSB Uncharacterized protein OS=Chlorocebus sabaeus GN=PLA2G16 PE=4 SV=1	NaN	NaN	1	0	1	1
800	>tr|A0A0D9R419|A0A0D9R419_CHLSB Uncharacterized protein OS=Chlorocebus sabaeus GN=EMC4 PE=4 SV=1	NaN	NaN	1	0	1	1
801	>tr|A0A0D9R626|A0A0D9R626_CHLSB Uncharacterized protein OS=Chlorocebus sabaeus GN=FARSB PE=4 SV=1	NaN	NaN	1	0	1	1
802	>tr|A0A0D9R8S7|A0A0D9R8S7_CHLSB Uncharacterized protein OS=Chlorocebus sabaeus GN=CYC1 PE=4 SV=1	NaN	NaN	1	0	1	1
803	>tr|A0A0D9RAG2|A0A0D9RAG2_CHLSB Uncharacterized protein OS=Chlorocebus sabaeus GN=FAF2 PE=4 SV=1	NaN	NaN	1	0	1	1
804	>tr|A0A0D9RCR5|A0A0D9RCR5_CHLSB Uncharacterized protein OS=Chlorocebus sabaeus GN=RARS PE=3 SV=1	NaN	NaN	1	0	1	1
805	>tr|A0A0D9RD80|A0A0D9RD80_CHLSB Uncharacterized protein OS=Chlorocebus sabaeus GN=MLF2 PE=4 SV=1	NaN	NaN	1	0	1	1
806	>tr|A0A0D9RDN5|A0A0D9RDN5_CHLSB Uncharacterized protein OS=Chlorocebus sabaeus PE=4 SV=1	NaN	1	NaN	0	1	1
807	>tr|A0A0D9RE92|A0A0D9RE92_CHLSB Uncharacterized protein OS=Chlorocebus sabaeus GN=RAB6B PE=4 SV=1	NaN	NaN	1	0	1	1
808	>tr|A0A0D9REG4|A0A0D9REG4_CHLSB Uncharacterized protein OS=Chlorocebus sabaeus GN=CASP8 PE=3 SV=1	NaN	NaN	1	0	1	1
809	>tr|A0A0D9RHD1|A0A0D9RHD1_CHLSB Uncharacterized protein OS=Chlorocebus sabaeus PE=4 SV=1	NaN	NaN	1	0	1	1
810	>tr|A0A0D9RHK0|A0A0D9RHK0_CHLSB Uncharacterized protein OS=Chlorocebus sabaeus GN=MRPS14 PE=4 SV=1	NaN	NaN	1	0	1	1
811	>tr|A0A0D9RIL6|A0A0D9RIL6_CHLSB Uncharacterized protein OS=Chlorocebus sabaeus PE=4 SV=1	NaN	NaN	1	0	1	1
812	>tr|A0A0D9RIT0|A0A0D9RIT0_CHLSB Uncharacterized protein OS=Chlorocebus sabaeus GN=HSDL2 PE=4 SV=1	NaN	1	NaN	0	1	1
813	>tr|A0A0D9RJK9|A0A0D9RJK9_CHLSB Uncharacterized protein OS=Chlorocebus sabaeus GN=FAM195A PE=4 SV=1	NaN	NaN	1	0	1	1
814	>tr|A0A0D9RL76|A0A0D9RL76_CHLSB Uncharacterized protein OS=Chlorocebus sabaeus GN=HDAC6 PE=4 SV=1	NaN	NaN	1	0	1	1
815	>tr|A0A0D9RM84|A0A0D9RM84_CHLSB Uncharacterized protein OS=Chlorocebus sabaeus GN=AP2M1 PE=4 SV=1	NaN	NaN	1	0	1	1
816	>tr|A0A0D9RMA6|A0A0D9RMA6_CHLSB Uncharacterized protein OS=Chlorocebus sabaeus GN=MSH6 PE=3 SV=1	NaN	NaN	1	0	1	1
817	>tr|A0A0D9RMR8|A0A0D9RMR8_CHLSB Clustered mitochondria protein homolog OS=Chlorocebus sabaeus GN=CLUH PE=3 SV=1	NaN	NaN	1	0	1	1
818	>tr|A0A0D9RPM3|A0A0D9RPM3_CHLSB Proteasome subunit alpha type OS=Chlorocebus sabaeus GN=PSMA3 PE=3 SV=1	NaN	NaN	1	0	1	1
819	>tr|A0A0D9RTM8|A0A0D9RTM8_CHLSB Uncharacterized protein OS=Chlorocebus sabaeus GN=SUCLG1 PE=3 SV=1	NaN	1	NaN	0	1	1
820	>tr|A0A0D9RU51|A0A0D9RU51_CHLSB Uncharacterized protein OS=Chlorocebus sabaeus GN=LANCL2 PE=4 SV=1	NaN	NaN	1	0	1	1
821	>tr|A0A0D9RV97|A0A0D9RV97_CHLSB Uncharacterized protein OS=Chlorocebus sabaeus GN=DHX29 PE=4 SV=1	NaN	NaN	1	0	1	1
822	>tr|A0A0D9RWH9|A0A0D9RWH9_CHLSB Uncharacterized protein OS=Chlorocebus sabaeus GN=TUBA3D PE=3 SV=1	1	NaN	NaN	0	1	1
823	>tr|A0A0D9RYF8|A0A0D9RYF8_CHLSB Uncharacterized protein OS=Chlorocebus sabaeus GN=TYMS PE=3 SV=1	NaN	NaN	1	0	1	1
824	>tr|A0A0D9S1T8|A0A0D9S1T8_CHLSB Uncharacterized protein OS=Chlorocebus sabaeus GN=PTRF PE=4 SV=1	NaN	NaN	1	0	1	1
825	>tr|A0A0D9S3A0|A0A0D9S3A0_CHLSB Uncharacterized protein OS=Chlorocebus sabaeus GN=TUBB3 PE=3 SV=1	NaN	NaN	1	0	1	1
826	>tr|A0A0D9S3N4|A0A0D9S3N4_CHLSB Uncharacterized protein OS=Chlorocebus sabaeus GN=ARCN1 PE=4 SV=1	NaN	NaN	1	0	1	1
827	>tr|A0A0D9S3R7|A0A0D9S3R7_CHLSB Uncharacterized protein OS=Chlorocebus sabaeus PE=4 SV=1	1	NaN	NaN	0	1	1
828	>tr|A0A0D9S3W2|A0A0D9S3W2_CHLSB Transgelin OS=Chlorocebus sabaeus GN=TAGLN2 PE=3 SV=1	NaN	NaN	1	0	1	1
829	>tr|A0A0D9S6X8|A0A0D9S6X8_CHLSB Uncharacterized protein OS=Chlorocebus sabaeus GN=NEXN PE=4 SV=1	NaN	NaN	1	0	1	1
830	>tr|A0A0D9S704|A0A0D9S704_CHLSB Uncharacterized protein OS=Chlorocebus sabaeus GN=SRSF11 PE=4 SV=1	NaN	NaN	1	0	1	1
831	>tr|A0A0D9S805|A0A0D9S805_CHLSB Uncharacterized protein OS=Chlorocebus sabaeus GN=YTHDF2 PE=4 SV=1	NaN	NaN	1	0	1	1
832	>tr|A0A0D9S8E6|A0A0D9S8E6_CHLSB Uncharacterized protein OS=Chlorocebus sabaeus GN=ALDH4A1 PE=3 SV=1	1	NaN	NaN	0	1	1
833	>tr|A0A0D9SCB4|A0A0D9SCB4_CHLSB Uncharacterized protein OS=Chlorocebus sabaeus GN=BASP1 PE=4 SV=1	NaN	NaN	1	0	1	1
834	>tr|G3KJ96|G3KJ96_CHLAE Apobec3DE (Fragment) OS=Chlorocebus aethiops GN=Apobec3DE PE=4 SV=1	NaN	NaN	1	0	1	1
835	>sp|K2C1_HUMAN|(Common contaminant protein)	1102	1003	1217	1	1217	3322
836	>sp|K22E_HUMAN|(Common contaminant protein)	777	1122	642	1	1122	2541
837	>sp|ALBU_BOVIN|(Common contaminant protein)	1064	879	837	1	1064	2780
838	>sp|K1C10_HUMAN|(Common contaminant protein)	692	759	586	1	759	2037
839	>sp|K1C9_HUMAN|(Common contaminant protein)	568	563	487	1	568	1618
840	>Reverse >tr|A0A0D9RMV4|A0A0D9RMV4_CHLSB Uncharacterized protein OS=Chlorocebus sabaeus GN=TSR1 PE=4 SV=1	136	155	70	1	155	361
841	>Reverse >tr|A0A0D9QVF2|A0A0D9QVF2_CHLSB Uncharacterized protein OS=Chlorocebus sabaeus GN=DKK2 PE=4 SV=1	119	143	145	1	145	407
842	>sp|TRYP_PIG|(Common contaminant protein)	111	108	111	1	111	330
843	>Reverse >tr|A0A0D9R269|A0A0D9R269_CHLSB Uncharacterized protein OS=Chlorocebus sabaeus GN=KIAA0556 PE=4 SV=1	91	110	99	1	110	300
844	>Reverse >tr|A0A0D9RYX2|A0A0D9RYX2_CHLSB Uncharacterized protein OS=Chlorocebus sabaeus GN=ENOX1 PE=4 SV=1	NaN	85	NaN	1	85	85
845	>Reverse >tr|A0A0D9S5C2|A0A0D9S5C2_CHLSB Uncharacterized protein OS=Chlorocebus sabaeus GN=SHC1 PE=4 SV=1	41	79	41	1	79	161
846	>Reverse >tr|A0A0D9RIB7|A0A0D9RIB7_CHLSB Uncharacterized protein OS=Chlorocebus sabaeus GN=ZNF483 PE=4 SV=1	65	69	43	1	69	177
847	>Reverse >tr|A0A0D9S262|A0A0D9S262_CHLSB Uncharacterized protein OS=Chlorocebus sabaeus GN=DYNC2H1 PE=4 SV=1	63	44	64	1	64	171
848	>sp|CO3_HUMAN|(Common contaminant protein)	42	20	14	1	42	76
849	>Reverse >tr|A0A0D9R346|A0A0D9R346_CHLSB Uncharacterized protein OS=Chlorocebus sabaeus GN=ARID2 PE=4 SV=1	NaN	41	NaN	1	41	41
850	>Reverse >tr|A0A0D9S8B8|A0A0D9S8B8_CHLSB Uncharacterized protein OS=Chlorocebus sabaeus PE=3 SV=1	NaN	36	NaN	1	36	36
851	>Reverse >tr|A0A0D9RGQ0|A0A0D9RGQ0_CHLSB Uncharacterized protein OS=Chlorocebus sabaeus GN=SPATA7 PE=4 SV=1	31	30	26	1	31	87
852	>Reverse >tr|A0A0D9RIA0|A0A0D9RIA0_CHLSB Uncharacterized protein OS=Chlorocebus sabaeus GN=KIAA0368 PE=4 SV=1	17	28	12	1	28	57
853	>sp|CAS1_BOVIN|(Common contaminant protein)	20	24	20	1	24	64
854	>Reverse >tr|A0A0D9RJC5|A0A0D9RJC5_CHLSB Uncharacterized protein OS=Chlorocebus sabaeus GN=AKAP9 PE=4 SV=1	23	NaN	NaN	1	23	23
855	>Reverse >tr|A0A0D9RSI0|A0A0D9RSI0_CHLSB Uncharacterized protein OS=Chlorocebus sabaeus GN=MBIP PE=4 SV=1	NaN	NaN	23	1	23	23
856	>Reverse >tr|A0A0D9RMC3|A0A0D9RMC3_CHLSB Uncharacterized protein OS=Chlorocebus sabaeus GN=TERF1 PE=4 SV=1	NaN	NaN	19	1	19	19
857	>Reverse >tr|A0A0D9RP07|A0A0D9RP07_CHLSB Uncharacterized protein OS=Chlorocebus sabaeus GN=CERCAM PE=4 SV=1	NaN	NaN	19	1	19	19
858	>Reverse >tr|A0A0D9R1A8|A0A0D9R1A8_CHLSB Uncharacterized protein OS=Chlorocebus sabaeus GN=ABI3BP PE=4 SV=1	18	NaN	14	1	18	32
859	>Reverse >tr|A0A0D9RMY2|A0A0D9RMY2_CHLSB Kinesin-like protein OS=Chlorocebus sabaeus GN=KIF21B PE=3 SV=1	18	NaN	NaN	1	18	18
860	>Reverse >tr|A0A0D9R1B4|A0A0D9R1B4_CHLSB Kinesin-like protein OS=Chlorocebus sabaeus GN=KIF22 PE=3 SV=1	NaN	NaN	17	1	17	17
861	>Reverse >tr|A0A0D9R1Z1|A0A0D9R1Z1_CHLSB Uncharacterized protein (Fragment) OS=Chlorocebus sabaeus GN=TMEM132E PE=4 SV=1	14	14	9	1	14	37
862	>Reverse >tr|A0A0D9S3X4|A0A0D9S3X4_CHLSB Uncharacterized protein OS=Chlorocebus sabaeus GN=SCAF1 PE=4 SV=1	14	3	NaN	1	14	17
863	>Reverse >tr|A0A0D9S2L6|A0A0D9S2L6_CHLSB Uncharacterized protein OS=Chlorocebus sabaeus GN=GLTSCR1 PE=4 SV=1	NaN	NaN	14	1	14	14
864	>Reverse >tr|A0A0D9R5R6|A0A0D9R5R6_CHLSB Uncharacterized protein OS=Chlorocebus sabaeus GN=DOCK10 PE=4 SV=1	12	NaN	NaN	1	12	12
865	>Reverse >tr|A0A0D9RNQ3|A0A0D9RNQ3_CHLSB Uncharacterized protein OS=Chlorocebus sabaeus GN=SLC27A6 PE=4 SV=1	NaN	NaN	12	1	12	12
866	>sp|ALBU_HUMAN|(Common contaminant protein)	11	5	3	1	11	19
867	>Reverse >tr|A0A0D9QZ17|A0A0D9QZ17_CHLSB Uncharacterized protein OS=Chlorocebus sabaeus GN=IRX3 PE=4 SV=1	NaN	NaN	11	1	11	11
868	>sp|CAS2_BOVIN|(Common contaminant protein)	11	NaN	NaN	1	11	11
869	>sp|TRFL_HUMAN|(Common contaminant protein)	10	9	5	1	10	24
870	>Reverse >tr|A0A0D9QVP6|A0A0D9QVP6_CHLSB Uncharacterized protein OS=Chlorocebus sabaeus GN=TBC1D15 PE=4 SV=1	NaN	9	NaN	1	9	9
871	>Reverse >tr|A0A0D9RMN6|A0A0D9RMN6_CHLSB Kinesin-like protein (Fragment) OS=Chlorocebus sabaeus GN=KIF3A PE=3 SV=1	NaN	9	NaN	1	9	9
872	>Reverse >tr|A0A0D9QVI1|A0A0D9QVI1_CHLSB Uncharacterized protein OS=Chlorocebus sabaeus GN=PGM2L1 PE=4 SV=1	NaN	8	NaN	1	8	8
873	>Reverse >tr|A0A0D9QZI5|A0A0D9QZI5_CHLSB Uncharacterized protein OS=Chlorocebus sabaeus GN=NOLC1 PE=4 SV=1	8	NaN	NaN	1	8	8
874	>Reverse >tr|A0A0D9R0K2|A0A0D9R0K2_CHLSB Uncharacterized protein OS=Chlorocebus sabaeus GN=TRIM37 PE=4 SV=1	7	3	3	1	7	13
875	>Reverse >tr|A0A0D9RRT0|A0A0D9RRT0_CHLSB Uncharacterized protein OS=Chlorocebus sabaeus GN=KCNG1 PE=4 SV=1	NaN	NaN	7	1	7	7
876	>Reverse >tr|A0A0D9RCW6|A0A0D9RCW6_CHLSB Uncharacterized protein OS=Chlorocebus sabaeus GN=KIAA1671 PE=4 SV=1	6	NaN	NaN	1	6	6
877	>sp|CASK_BOVIN|(Common contaminant protein)	6	NaN	NaN	1	6	6
878	>Reverse >tr|A0A0D9RNU4|A0A0D9RNU4_CHLSB Uncharacterized protein OS=Chlorocebus sabaeus GN=MLH1 PE=4 SV=1	NaN	5	NaN	1	5	5
879	>gi|1373325|gb|AAB08064.1| Enhanced Green Fluorescent Protein [Cloning vector pEGFP-N3](Common contaminant protein)	4	NaN	NaN	1	4	4
880	>sp|CASB_BOVIN|(Common contaminant protein)	4	NaN	NaN	1	4	4
881	>sp|GSTP1_HUMAN|(Common contaminant protein)	NaN	NaN	4	1	4	4
882	>sp|K1M1_SHEEP|(Common contaminant protein)	4	NaN	NaN	1	4	4
883	>Reverse >tr|A0A0D9QVZ4|A0A0D9QVZ4_CHLSB Uncharacterized protein OS=Chlorocebus sabaeus GN=FOLR1 PE=4 SV=1	NaN	NaN	3	1	3	3
884	>Reverse >tr|A0A0D9R2I1|A0A0D9R2I1_CHLSB Uncharacterized protein OS=Chlorocebus sabaeus GN=EXOC6 PE=4 SV=1	NaN	3	NaN	1	3	3
885	>Reverse >tr|A0A0D9R6P9|A0A0D9R6P9_CHLSB Uncharacterized protein OS=Chlorocebus sabaeus GN=TRIM7 PE=4 SV=1	3	NaN	NaN	1	3	3
886	>Reverse >tr|A0A0D9RD57|A0A0D9RD57_CHLSB Uncharacterized protein (Fragment) OS=Chlorocebus sabaeus GN=CADPS2 PE=4 SV=1	2	NaN	NaN	1	2	2
887	>Reverse >tr|A0A0D9QWT2|A0A0D9QWT2_CHLSB Uncharacterized protein OS=Chlorocebus sabaeus GN=FANK1 PE=4 SV=1	NaN	1	NaN	1	1	1
888	>Reverse >tr|A0A0D9S520|A0A0D9S520_CHLSB Uncharacterized protein (Fragment) OS=Chlorocebus sabaeus GN=ARL6IP4 PE=4 SV=1	1	NaN	NaN	1	1	1

## Sheet: LOCAL
Rank Number	Protein Name	SD_1	SD_2	SD_3	CONTAMINANT	MAX	SUM
1	>tr|A0A0D9R924|A0A0D9R924_CHLSB Uncharacterized protein OS=Chlorocebus sabaeus GN=PLEC PE=4 SV=1	312	3057	3137	0	3137	6506
2	>sp|Q76N69|ACTB_CHLAE Actin- cytoplasmic 1 OS=Chlorocebus aethiops GN=ACTB PE=2 SV=1	165	618	989	0	989	1772
3	>tr|A0A0D9R6E6|A0A0D9R6E6_CHLSB Uncharacterized protein OS=Chlorocebus sabaeus GN=MYH9 PE=4 SV=1	94	900	497	0	900	1491
4	>VP4 (RRV-4- 776aa):	NaN	830	219	0	830	1049
5	>VP2 (RRV-2- 887aa):	NaN	681	364	0	681	1045
6	>tr|A0A0D9RN38|A0A0D9RN38_CHLSB Uncharacterized protein OS=Chlorocebus sabaeus GN=SPTBN1 PE=4 SV=1	NaN	531	556	0	556	1087
7	>tr|A0A0D9R4Y1|A0A0D9R4Y1_CHLSB Uncharacterized protein OS=Chlorocebus sabaeus GN=DSP PE=4 SV=1	118	489	207	0	489	814
8	>tr|A0A0D9RP68|A0A0D9RP68_CHLSB Uncharacterized protein OS=Chlorocebus sabaeus GN=SPTAN1 PE=4 SV=1	NaN	461	487	0	487	948
9	>tr|A0A0D9RKZ5|A0A0D9RKZ5_CHLSB Uncharacterized protein OS=Chlorocebus sabaeus GN=ACTN1 PE=4 SV=1	NaN	156	417	0	417	573
10	>tr|A0A0D9RGG4|A0A0D9RGG4_CHLSB Uncharacterized protein OS=Chlorocebus sabaeus GN=SF3B1 PE=4 SV=1	408	253	262	0	408	923
11	>tr|A0A0D9R2J6|A0A0D9R2J6_CHLSB Uncharacterized protein (Fragment) OS=Chlorocebus sabaeus GN=AHNAK PE=4 SV=1	14	87	356	0	356	457
12	>tr|A0A0D9RFZ0|A0A0D9RFZ0_CHLSB Uncharacterized protein OS=Chlorocebus sabaeus GN=U2SURP PE=4 SV=1	327	203	194	0	327	724
13	>NSP2 (RRV-8- 317aa):	NaN	314	258	0	314	572
14	>tr|A0A0D9S7U2|A0A0D9S7U2_CHLSB Uncharacterized protein OS=Chlorocebus sabaeus GN=SFPQ PE=4 SV=1	79	88	310	0	310	477
15	>tr|A0A0D9SC49|A0A0D9SC49_CHLSB Uncharacterized protein OS=Chlorocebus sabaeus PE=3 SV=1	6	75	307	0	307	388
16	>tr|A0A0D9RQR8|A0A0D9RQR8_CHLSB Uncharacterized protein OS=Chlorocebus sabaeus GN=PRKDC PE=4 SV=1	86	125	306	0	306	517
17	>tr|A0A0D9RG77|A0A0D9RG77_CHLSB Uncharacterized protein OS=Chlorocebus sabaeus GN=SYNPO PE=4 SV=1	NaN	116	299	0	299	415
18	>tr|A0A0D9RDH4|A0A0D9RDH4_CHLSB Uncharacterized protein OS=Chlorocebus sabaeus GN=MYH10 PE=4 SV=1	NaN	296	183	0	296	479
19	>tr|A0A0D9RMN8|A0A0D9RMN8_CHLSB Uncharacterized protein OS=Chlorocebus sabaeus GN=PPM1F PE=3 SV=1	263	234	167	0	263	664
20	>tr|A0A0D9QWH4|A0A0D9QWH4_CHLSB Uncharacterized protein OS=Chlorocebus sabaeus GN=SF3B3 PE=4 SV=1	256	255	149	0	256	660
21	>tr|A0A0D9RC89|A0A0D9RC89_CHLSB Uncharacterized protein OS=Chlorocebus sabaeus GN=FLNC PE=4 SV=1	11	164	249	0	249	424
22	>tr|A0A0D9R093|A0A0D9R093_CHLSB Uncharacterized protein OS=Chlorocebus sabaeus GN=CHERP PE=4 SV=1	220	122	111	0	220	453
23	>VP1 (RRV-1- 1088aa):	NaN	184	217	0	217	401
24	>tr|A0A0D9S5L7|A0A0D9S5L7_CHLSB Protein tweety homolog OS=Chlorocebus sabaeus GN=TTYH1 PE=3 SV=1	215	193	159	0	215	567
25	>tr|A0A0D9RGZ2|A0A0D9RGZ2_CHLSB Uncharacterized protein OS=Chlorocebus sabaeus GN=SVIL PE=4 SV=1	NaN	166	212	0	212	378
26	>tr|A0A0D9R612|A0A0D9R612_CHLSB Uncharacterized protein OS=Chlorocebus sabaeus GN=SPECC1 PE=4 SV=1	NaN	NaN	205	0	205	205
27	>VP6 (RRV-6- 397aa):	NaN	197	160	0	197	357
28	>tr|A0A0D9S2F0|A0A0D9S2F0_CHLSB Uncharacterized protein OS=Chlorocebus sabaeus GN=KRT14 PE=3 SV=1	188	148	165	0	188	501
29	>tr|A0A0D9RHW7|A0A0D9RHW7_CHLSB Polyadenylate-binding protein OS=Chlorocebus sabaeus GN=PABPC1 PE=3 SV=1	101	74	182	0	182	357
30	>tr|A0A0D9RZL6|A0A0D9RZL6_CHLSB Uncharacterized protein OS=Chlorocebus sabaeus GN=SPATA13 PE=4 SV=1	166	133	170	0	170	469
31	>tr|A0A0D9QVJ0|A0A0D9QVJ0_CHLSB Uncharacterized protein OS=Chlorocebus sabaeus GN=ACTN4 PE=4 SV=1	NaN	67	169	0	169	236
32	>tr|A0A0D9R1G2|A0A0D9R1G2_CHLSB Uncharacterized protein OS=Chlorocebus sabaeus GN=TUBA1C PE=3 SV=1	111	168	165	0	168	444
33	>tr|A0A0D9RVM1|A0A0D9RVM1_CHLSB Uncharacterized protein OS=Chlorocebus sabaeus GN=DHX15 PE=4 SV=1	165	92	88	0	165	345
34	>tr|A0A0D9R055|A0A0D9R055_CHLSB Uncharacterized protein OS=Chlorocebus sabaeus GN=KRT5 PE=3 SV=1	104	161	103	0	161	368
35	>tr|A0A0D9RG28|A0A0D9RG28_CHLSB Uncharacterized protein (Fragment) OS=Chlorocebus sabaeus PE=4 SV=1	9	13	161	0	161	183
36	>tr|A0A0D9QZ56|A0A0D9QZ56_CHLSB Uncharacterized protein OS=Chlorocebus sabaeus GN=UBA52 PE=4 SV=1	NaN	39	159	0	159	198
37	>tr|A0A0D9R7E7|A0A0D9R7E7_CHLSB Uncharacterized protein OS=Chlorocebus sabaeus GN=TUBB PE=3 SV=1	86	155	129	0	155	370
38	>tr|A0A0D9QVW2|A0A0D9QVW2_CHLSB Uncharacterized protein OS=Chlorocebus sabaeus GN=SIPA1L3 PE=4 SV=1	NaN	NaN	155	0	155	155
39	>tr|A0A0D9RJC5|A0A0D9RJC5_CHLSB Uncharacterized protein OS=Chlorocebus sabaeus GN=AKAP9 PE=4 SV=1	154	105	85	0	154	344
40	>tr|A0A0D9R6Z5|A0A0D9R6Z5_CHLSB Uncharacterized protein OS=Chlorocebus sabaeus GN=SF3B2 PE=4 SV=1	146	69	110	0	146	325
41	>tr|A0A0D9RI00|A0A0D9RI00_CHLSB Uncharacterized protein OS=Chlorocebus sabaeus GN=MYO1B PE=4 SV=1	NaN	53	142	0	142	195
42	>tr|A0A0D9RWY7|A0A0D9RWY7_CHLSB Uncharacterized protein OS=Chlorocebus sabaeus GN=LIMCH1 PE=4 SV=1	NaN	142	22	0	142	164
43	>VP3 (RRV-3- 835aa):	NaN	27	141	0	141	168
44	>NSP3 (RRV-7- 313aa):	NaN	140	102	0	140	242
45	>tr|A0A0D9R370|A0A0D9R370_CHLSB Uncharacterized protein OS=Chlorocebus sabaeus GN=FLNA PE=4 SV=1	20	93	137	0	137	250
46	>tr|A0A0D9RS12|A0A0D9RS12_CHLSB Uncharacterized protein OS=Chlorocebus sabaeus GN=SHROOM2 PE=4 SV=1	NaN	12	137	0	137	149
47	>tr|A0A0D9SDL6|A0A0D9SDL6_CHLSB Uncharacterized protein OS=Chlorocebus sabaeus GN=RPS17 PE=3 SV=1	98	89	136	0	136	323
48	>tr|A0A0D9RIZ4|A0A0D9RIZ4_CHLSB Uncharacterized protein OS=Chlorocebus sabaeus GN=KIAA1217 PE=4 SV=1	136	96	65	0	136	297
49	>tr|A0A0D9RYD3|A0A0D9RYD3_CHLSB Uncharacterized protein OS=Chlorocebus sabaeus GN=LMO7 PE=4 SV=1	NaN	114	135	0	135	249
50	>tr|A0A0D9R0N5|A0A0D9R0N5_CHLSB Clathrin heavy chain OS=Chlorocebus sabaeus GN=CLTC PE=3 SV=1	65	79	133	0	133	277
51	>tr|A0A0D9R0H0|A0A0D9R0H0_CHLSB Uncharacterized protein OS=Chlorocebus sabaeus GN=KRT7 PE=3 SV=1	NaN	24	132	0	132	156
52	>tr|A0A0D9RMM1|A0A0D9RMM1_CHLSB Uncharacterized protein OS=Chlorocebus sabaeus GN=EIF4G1 PE=4 SV=1	20	61	129	0	129	210
53	>tr|A0A0D9S4Z6|A0A0D9S4Z6_CHLSB Uncharacterized protein OS=Chlorocebus sabaeus GN=LMNA PE=3 SV=1	NaN	NaN	127	0	127	127
54	>sp|P84198|VIME_CHLAE Vimentin OS=Chlorocebus aethiops GN=VIM PE=1 SV=3	NaN	96	125	0	125	221
55	>tr|A0A0D9R642|A0A0D9R642_CHLSB Hexokinase OS=Chlorocebus sabaeus GN=HKDC1 PE=3 SV=1	7	44	125	0	125	176
56	>tr|A0A0D9RJZ5|A0A0D9RJZ5_CHLSB Uncharacterized protein OS=Chlorocebus sabaeus GN=PTBP1 PE=4 SV=1	90	41	124	0	124	255
57	>tr|A0A0D9R1V9|A0A0D9R1V9_CHLSB Uncharacterized protein OS=Chlorocebus sabaeus GN=ATXN2L PE=4 SV=1	NaN	NaN	124	0	124	124
58	>tr|A0A0D9R221|A0A0D9R221_CHLSB Uncharacterized protein OS=Chlorocebus sabaeus GN=MYO1D PE=4 SV=1	NaN	34	123	0	123	157
59	>tr|A0A0D9RNK4|A0A0D9RNK4_CHLSB Uncharacterized protein OS=Chlorocebus sabaeus GN=MYO1C PE=4 SV=1	NaN	38	120	0	120	158
60	>tr|A0A0D9S0X3|A0A0D9S0X3_CHLSB Uncharacterized protein OS=Chlorocebus sabaeus GN=TMPO PE=4 SV=1	NaN	NaN	116	0	116	116
61	>tr|A0A0D9S3L7|A0A0D9S3L7_CHLSB Uncharacterized protein OS=Chlorocebus sabaeus GN=ATXN2 PE=4 SV=1	114	51	109	0	114	274
62	>tr|A0A0D9SD81|A0A0D9SD81_CHLSB Uncharacterized protein OS=Chlorocebus sabaeus GN=HSPA1B PE=3 SV=1	8	NaN	114	0	114	122
63	>tr|A0A0D9R058|A0A0D9R058_CHLSB Uncharacterized protein OS=Chlorocebus sabaeus PE=3 SV=1	113	44	86	0	113	243
64	>tr|A0A0D9S2K1|A0A0D9S2K1_CHLSB Uncharacterized protein OS=Chlorocebus sabaeus GN=SORBS2 PE=4 SV=1	NaN	67	111	0	111	178
65	>tr|A0A0D9RJV9|A0A0D9RJV9_CHLSB Uncharacterized protein (Fragment) OS=Chlorocebus sabaeus GN=EZR PE=4 SV=1	36	50	110	0	110	196
66	>tr|A0A0D9RM61|A0A0D9RM61_CHLSB Uncharacterized protein OS=Chlorocebus sabaeus GN=RBM17 PE=4 SV=1	108	95	71	0	108	274
67	>tr|A0A0D9RKI7|A0A0D9RKI7_CHLSB Uncharacterized protein OS=Chlorocebus sabaeus GN=MAVS PE=4 SV=1	108	78	78	0	108	264
68	>tr|A0A0D9RBE4|A0A0D9RBE4_CHLSB Uncharacterized protein OS=Chlorocebus sabaeus GN=CAD PE=3 SV=1	108	37	46	0	108	191
69	>tr|A0A0D9RJE1|A0A0D9RJE1_CHLSB Uncharacterized protein OS=Chlorocebus sabaeus GN=DHX9 PE=4 SV=1	32	76	106	0	106	214
70	>tr|A0A0D9R350|A0A0D9R350_CHLSB Uncharacterized protein OS=Chlorocebus sabaeus GN=TJP1 PE=4 SV=1	NaN	44	105	0	105	149
71	>tr|A0A0D9R3U8|A0A0D9R3U8_CHLSB Uncharacterized protein OS=Chlorocebus sabaeus GN=NUFIP2 PE=4 SV=1	NaN	NaN	105	0	105	105
72	>tr|A0A0D9RR62|A0A0D9RR62_CHLSB Uncharacterized protein OS=Chlorocebus sabaeus GN=MOSPD2 PE=4 SV=1	NaN	95	104	0	104	199
73	>tr|A0A0D9RD14|A0A0D9RD14_CHLSB Uncharacterized protein OS=Chlorocebus sabaeus GN=DYNC1H1 PE=4 SV=1	NaN	63	103	0	103	166
74	>tr|A0A0D9S7P7|A0A0D9S7P7_CHLSB Uncharacterized protein OS=Chlorocebus sabaeus GN=MACF1 PE=4 SV=1	NaN	25	99	0	99	124
75	>tr|A0A0D9RZP1|A0A0D9RZP1_CHLSB Uncharacterized protein OS=Chlorocebus sabaeus GN=MYO5B PE=4 SV=1	NaN	21	99	0	99	120
76	>tr|A0A0D9RKW3|A0A0D9RKW3_CHLSB Uncharacterized protein OS=Chlorocebus sabaeus PE=4 SV=1	NaN	NaN	98	0	98	98
77	>tr|A0A0D9S8U9|A0A0D9S8U9_CHLSB Uncharacterized protein OS=Chlorocebus sabaeus GN=TTC34 PE=4 SV=1	NaN	NaN	97	0	97	97
78	>tr|A0A0D9QVC9|A0A0D9QVC9_CHLSB Protein phosphatase 1 regulatory subunit OS=Chlorocebus sabaeus GN=PPP1R12A PE=4 SV=1	NaN	NaN	94	0	94	94
79	>tr|A0A0D9RIF8|A0A0D9RIF8_CHLSB Uncharacterized protein OS=Chlorocebus sabaeus GN=FLNB PE=4 SV=1	92	62	55	0	92	209
80	>tr|A0A0D9R5M1|A0A0D9R5M1_CHLSB Uncharacterized protein OS=Chlorocebus sabaeus GN=CCAR1 PE=4 SV=1	61	2	92	0	92	155
81	>tr|A0A0D9R480|A0A0D9R480_CHLSB Uncharacterized protein OS=Chlorocebus sabaeus GN=ACTC1 PE=3 SV=1	6	90	83	0	90	179
82	>tr|A0A0D9S4U3|A0A0D9S4U3_CHLSB Uncharacterized protein OS=Chlorocebus sabaeus GN=FASN PE=4 SV=1	35	56	89	0	89	180
83	>tr|A0A0D9REI2|A0A0D9REI2_CHLSB Uncharacterized protein OS=Chlorocebus sabaeus GN=LARP1 PE=4 SV=1	29	NaN	88	0	88	117
84	>tr|A0A0D9S4D0|A0A0D9S4D0_CHLSB Uncharacterized protein OS=Chlorocebus sabaeus GN=RNF213 PE=4 SV=1	NaN	NaN	88	0	88	88
85	>tr|A0A0D9S2W6|A0A0D9S2W6_CHLSB Uncharacterized protein OS=Chlorocebus sabaeus GN=KRT20 PE=3 SV=1	NaN	NaN	87	0	87	87
86	>tr|A0A0D9R0F3|A0A0D9R0F3_CHLSB Uncharacterized protein OS=Chlorocebus sabaeus GN=XRCC6 PE=4 SV=1	NaN	NaN	83	0	83	83
87	>tr|A0A0D9REQ6|A0A0D9REQ6_CHLSB Uncharacterized protein OS=Chlorocebus sabaeus GN=G3BP1 PE=4 SV=1	10	NaN	81	0	81	91
88	>tr|A0A0D9SEF9|A0A0D9SEF9_CHLSB Uncharacterized protein OS=Chlorocebus sabaeus PE=3 SV=1	66	38	78	0	78	182
89	>tr|A0A0D9RAT5|A0A0D9RAT5_CHLSB Uncharacterized protein OS=Chlorocebus sabaeus GN=SF3A1 PE=4 SV=1	78	55	19	0	78	152
90	>tr|A0A0D9QV93|A0A0D9QV93_CHLSB Uncharacterized protein OS=Chlorocebus sabaeus GN=RPS3 PE=3 SV=1	20	35	76	0	76	131
91	>tr|A0A0D9RDR4|A0A0D9RDR4_CHLSB Glyceraldehyde-3-phosphate dehydrogenase OS=Chlorocebus sabaeus PE=3 SV=1	15	23	75	0	75	113
92	>tr|A0A0D9RQS8|A0A0D9RQS8_CHLSB Uncharacterized protein OS=Chlorocebus sabaeus GN=VCAN PE=4 SV=1	34	54	74	0	74	162
93	>tr|A0A0D9S2T3|A0A0D9S2T3_CHLSB Coronin OS=Chlorocebus sabaeus GN=CORO1C PE=3 SV=1	NaN	64	74	0	74	138
94	>tr|A0A0D9SCL8|A0A0D9SCL8_CHLSB Histone H2B OS=Chlorocebus sabaeus GN=HIST1H2BB PE=3 SV=1	NaN	NaN	74	0	74	74
95	>tr|A0A0D9S2E8|A0A0D9S2E8_CHLSB Uncharacterized protein OS=Chlorocebus sabaeus GN=KRT16 PE=3 SV=1	72	47	49	0	72	168
96	>tr|A0A0D9RK50|A0A0D9RK50_CHLSB Uncharacterized protein OS=Chlorocebus sabaeus GN=PPP1R9A PE=4 SV=1	NaN	18	72	0	72	90
97	>tr|A0A0D9S441|A0A0D9S441_CHLSB Uncharacterized protein OS=Chlorocebus sabaeus GN=HSPA8 PE=3 SV=1	71	45	58	0	71	174
98	>tr|A0A0D9RL59|A0A0D9RL59_CHLSB Uncharacterized protein OS=Chlorocebus sabaeus GN=FXR1 PE=4 SV=1	38	7	71	0	71	116
99	>tr|A0A0D9S1G6|A0A0D9S1G6_CHLSB 40S ribosomal protein S3a OS=Chlorocebus sabaeus GN=RPS3A PE=3 SV=1	8	8	71	0	71	87
100	>tr|A0A0D9RIR5|A0A0D9RIR5_CHLSB Uncharacterized protein OS=Chlorocebus sabaeus GN=LACTB PE=4 SV=1	2	NaN	71	0	71	73
101	>tr|A0A0D9QW70|A0A0D9QW70_CHLSB Uncharacterized protein OS=Chlorocebus sabaeus GN=TRIM21 PE=4 SV=1	70	45	35	0	70	150
102	>tr|A0A0D9R8U2|A0A0D9R8U2_CHLSB Uncharacterized protein OS=Chlorocebus sabaeus GN=DBN1 PE=4 SV=1	NaN	58	68	0	68	126
103	>tr|A0A0D9QYB1|A0A0D9QYB1_CHLSB ATP synthase subunit beta OS=Chlorocebus sabaeus GN=ATP5B PE=3 SV=1	68	19	35	0	68	122
104	>tr|A0A0D9R6A2|A0A0D9R6A2_CHLSB Uncharacterized protein OS=Chlorocebus sabaeus GN=DDX1 PE=4 SV=1	NaN	NaN	67	0	67	67
105	>tr|A0A0D9S3N9|A0A0D9S3N9_CHLSB Uncharacterized protein OS=Chlorocebus sabaeus GN=DDX6 PE=3 SV=1	30	18	66	0	66	114
106	>tr|A0A0D9RG49|A0A0D9RG49_CHLSB Uncharacterized protein OS=Chlorocebus sabaeus GN=FXR2 PE=4 SV=1	17	NaN	63	0	63	80
107	>tr|A0A0D9QZ01|A0A0D9QZ01_CHLSB Uncharacterized protein OS=Chlorocebus sabaeus GN=UPF1 PE=4 SV=1	43	NaN	62	0	62	105
108	>tr|A0A0D9QZF1|A0A0D9QZF1_CHLSB Uncharacterized protein OS=Chlorocebus sabaeus GN=HNRNPA1 PE=4 SV=1	NaN	19	62	0	62	81
109	>NSP4 (RRV-10- 175aa):	NaN	62	7	0	62	69
110	>tr|A0A0D9SD09|A0A0D9SD09_CHLSB Histone H4 OS=Chlorocebus sabaeus PE=3 SV=1	61	29	53	0	61	143
111	>tr|A0A0D9RLP2|A0A0D9RLP2_CHLSB Uncharacterized protein OS=Chlorocebus sabaeus GN=DST PE=4 SV=1	NaN	38	61	0	61	99
112	>tr|A0A0D9RGD1|A0A0D9RGD1_CHLSB Uncharacterized protein OS=Chlorocebus sabaeus GN=EIF4A1 PE=3 SV=1	4	NaN	59	0	59	63
113	>tr|A0A0D9S0H6|A0A0D9S0H6_CHLSB Uncharacterized protein OS=Chlorocebus sabaeus GN=SLC25A5 PE=3 SV=1	NaN	6	58	0	58	64
114	>tr|A0A0D9RTG0|A0A0D9RTG0_CHLSB Uncharacterized protein OS=Chlorocebus sabaeus GN=SEC16A PE=4 SV=1	57	51	31	0	57	139
115	>tr|A0A0D9R3X3|A0A0D9R3X3_CHLSB Uncharacterized protein OS=Chlorocebus sabaeus GN=MYO18A PE=4 SV=1	NaN	57	13	0	57	70
116	>tr|A0A0D9R9Q4|A0A0D9R9Q4_CHLSB X-ray repair cross-complementing protein 5 OS=Chlorocebus sabaeus GN=XRCC5 PE=3 SV=1	NaN	NaN	57	0	57	57
117	>tr|A0A0D9RRV1|A0A0D9RRV1_CHLSB Inosine-5'-monophosphate dehydrogenase OS=Chlorocebus sabaeus GN=IMPDH2 PE=3 SV=1	NaN	NaN	57	0	57	57
118	>tr|A0A0D9R403|A0A0D9R403_CHLSB Uncharacterized protein OS=Chlorocebus sabaeus GN=FAM120A PE=4 SV=1	27	4	55	0	55	86
119	>tr|A0A0D9RWT9|A0A0D9RWT9_CHLSB Uncharacterized protein OS=Chlorocebus sabaeus GN=REPS1 PE=4 SV=1	54	31	28	0	54	113
120	>NSP1 (RRV-5- 501aa):	NaN	37	54	0	54	91
121	>tr|A0A0D9RUY0|A0A0D9RUY0_CHLSB Uncharacterized protein OS=Chlorocebus sabaeus GN=PARP1 PE=4 SV=1	9	NaN	53	0	53	62
122	>sp|Q76N24|RS4X_CHLAE 40S ribosomal protein S4- X isoform OS=Chlorocebus aethiops GN=RPS4X PE=2 SV=3	29	15	52	0	52	96
123	>tr|A0A0D9S316|A0A0D9S316_CHLSB DNA topoisomerase 2 OS=Chlorocebus sabaeus GN=TOP2A PE=3 SV=1	12	NaN	52	0	52	64
124	>tr|A0A0D9RMK2|A0A0D9RMK2_CHLSB Uncharacterized protein OS=Chlorocebus sabaeus GN=RBM10 PE=4 SV=1	51	8	37	0	51	96
125	>tr|A0A0D9R7T1|A0A0D9R7T1_CHLSB Uncharacterized protein OS=Chlorocebus sabaeus GN=HNRNPH1 PE=4 SV=1	2	NaN	51	0	51	53
126	>tr|A0A0D9RBE0|A0A0D9RBE0_CHLSB Uncharacterized protein OS=Chlorocebus sabaeus GN=LEMD2 PE=4 SV=1	NaN	NaN	51	0	51	51
127	>tr|A0A0D9RWI0|A0A0D9RWI0_CHLSB Uncharacterized protein OS=Chlorocebus sabaeus GN=RFC1 PE=4 SV=1	NaN	NaN	51	0	51	51
128	>tr|A0A0D9R0Y7|A0A0D9R0Y7_CHLSB Uncharacterized protein OS=Chlorocebus sabaeus GN=LIMA1 PE=4 SV=1	NaN	25	50	0	50	75
129	>tr|A0A0D9RZW6|A0A0D9RZW6_CHLSB Uncharacterized protein OS=Chlorocebus sabaeus GN=HSPB1 PE=3 SV=1	NaN	24	50	0	50	74
130	>tr|A0A0D9RMI5|A0A0D9RMI5_CHLSB Uncharacterized protein OS=Chlorocebus sabaeus GN=UACA PE=4 SV=1	49	9	12	0	49	70
131	>tr|A0A0D9QXL4|A0A0D9QXL4_CHLSB Eukaryotic translation initiation factor 3 subunit A OS=Chlorocebus sabaeus GN=EIF3A PE=3 SV=1	NaN	NaN	49	0	49	49
132	>tr|A0A0D9RZE8|A0A0D9RZE8_CHLSB ATP synthase subunit alpha OS=Chlorocebus sabaeus GN=ATP5A1 PE=3 SV=1	40	48	20	0	48	108
133	>tr|A0A0D9RS65|A0A0D9RS65_CHLSB Uncharacterized protein (Fragment) OS=Chlorocebus sabaeus PE=4 SV=1	NaN	12	48	0	48	60
134	>tr|A0A0D9QVI6|A0A0D9QVI6_CHLSB Uncharacterized protein OS=Chlorocebus sabaeus GN=DDX5 PE=3 SV=1	NaN	NaN	48	0	48	48
135	>tr|A0A0D9R1V5|A0A0D9R1V5_CHLSB Uncharacterized protein (Fragment) OS=Chlorocebus sabaeus GN=MYOF PE=4 SV=1	NaN	NaN	48	0	48	48
136	>tr|A0A0D9RA32|A0A0D9RA32_CHLSB Uncharacterized protein OS=Chlorocebus sabaeus GN=HNRNPU PE=4 SV=1	9	25	47	0	47	81
137	>tr|A0A0D9RKF0|A0A0D9RKF0_CHLSB Uncharacterized protein OS=Chlorocebus sabaeus GN=SIPA1L1 PE=4 SV=1	NaN	NaN	47	0	47	47
138	>tr|A0A0D9RRX9|A0A0D9RRX9_CHLSB Uncharacterized protein OS=Chlorocebus sabaeus GN=RPS29 PE=4 SV=1	36	29	46	0	46	111
139	>tr|A0A0D9S5K6|A0A0D9S5K6_CHLSB Uncharacterized protein OS=Chlorocebus sabaeus GN=SFSWAP PE=4 SV=1	38	5	46	0	46	89
140	>tr|A0A0D9RMB4|A0A0D9RMB4_CHLSB Uncharacterized protein OS=Chlorocebus sabaeus PE=3 SV=1	9	7	46	0	46	62
141	>tr|A0A0D9R723|A0A0D9R723_CHLSB ELAV-like protein OS=Chlorocebus sabaeus GN=ELAVL1 PE=3 SV=1	6	3	46	0	46	55
142	>tr|A0A0D9RNJ1|A0A0D9RNJ1_CHLSB Elongation factor 1-alpha OS=Chlorocebus sabaeus GN=EEF1A1 PE=3 SV=1	34	32	44	0	44	110
143	>tr|A0A0D9R541|A0A0D9R541_CHLSB Uncharacterized protein OS=Chlorocebus sabaeus GN=COL18A1 PE=4 SV=1	5	34	44	0	44	83
144	>tr|A0A0D9RTB5|A0A0D9RTB5_CHLSB Uncharacterized protein OS=Chlorocebus sabaeus GN=EPRS PE=3 SV=1	11	7	44	0	44	62
145	>tr|A0A0D9QV84|A0A0D9QV84_CHLSB Uncharacterized protein OS=Chlorocebus sabaeus GN=SERPINH1 PE=3 SV=1	NaN	15	44	0	44	59
146	>tr|A0A0D9S4H7|A0A0D9S4H7_CHLSB Uncharacterized protein OS=Chlorocebus sabaeus GN=RPLP0 PE=3 SV=1	12	3	44	0	44	59
147	>tr|A0A0D9RK88|A0A0D9RK88_CHLSB Uncharacterized protein OS=Chlorocebus sabaeus PE=4 SV=1	NaN	NaN	44	0	44	44
148	>tr|A0A0D9QZA0|A0A0D9QZA0_CHLSB Uncharacterized protein OS=Chlorocebus sabaeus GN=CAPRIN1 PE=4 SV=1	NaN	NaN	43	0	43	43
149	>tr|A0A0D9RZY7|A0A0D9RZY7_CHLSB Uncharacterized protein OS=Chlorocebus sabaeus GN=ALPK2 PE=4 SV=1	NaN	NaN	43	0	43	43
150	>tr|A0A0D9RAV0|A0A0D9RAV0_CHLSB Uncharacterized protein OS=Chlorocebus sabaeus GN=A2M PE=4 SV=1	42	27	22	0	42	91
151	>tr|A0A0D9S8D8|A0A0D9S8D8_CHLSB Uncharacterized protein OS=Chlorocebus sabaeus GN=CAPZB PE=4 SV=1	NaN	28	42	0	42	70
152	>tr|A0A0D9R6H5|A0A0D9R6H5_CHLSB Uncharacterized protein OS=Chlorocebus sabaeus PE=3 SV=1	11	29	41	0	41	81
153	>tr|A0A0D9RX70|A0A0D9RX70_CHLSB Uncharacterized protein OS=Chlorocebus sabaeus GN=TBC1D8 PE=4 SV=1	41	NaN	NaN	0	41	41
154	>tr|A0A0D9R6L1|A0A0D9R6L1_CHLSB Uncharacterized protein OS=Chlorocebus sabaeus GN=HNRNPM PE=4 SV=1	NaN	14	40	0	40	54
155	>tr|A0A0D9RSX6|A0A0D9RSX6_CHLSB Uncharacterized protein OS=Chlorocebus sabaeus GN=MAP1B PE=4 SV=1	8	NaN	40	0	40	48
156	>tr|A0A0D9S0E1|A0A0D9S0E1_CHLSB Uncharacterized protein OS=Chlorocebus sabaeus GN=DDX3Y PE=3 SV=1	NaN	3	40	0	40	43
157	>tr|A0A0D9R6X7|A0A0D9R6X7_CHLSB Single-stranded DNA-binding protein OS=Chlorocebus sabaeus GN=SSBP1 PE=3 SV=1	NaN	NaN	40	0	40	40
158	>tr|A0A0D9SBN8|A0A0D9SBN8_CHLSB Uncharacterized protein OS=Chlorocebus sabaeus GN=RPS9 PE=3 SV=1	23	27	39	0	39	89
159	>tr|A0A0D9S2D4|A0A0D9S2D4_CHLSB Uncharacterized protein OS=Chlorocebus sabaeus GN=JUP PE=4 SV=1	39	18	16	0	39	73
160	>tr|A0A0D9RI07|A0A0D9RI07_CHLSB Annexin OS=Chlorocebus sabaeus PE=3 SV=1	7	15	39	0	39	61
161	>tr|A0A0D9R627|A0A0D9R627_CHLSB Uncharacterized protein OS=Chlorocebus sabaeus GN=RPAP1 PE=4 SV=1	38	8	11	0	38	57
162	>tr|A0A0D9RNC9|A0A0D9RNC9_CHLSB Uncharacterized protein (Fragment) OS=Chlorocebus sabaeus GN=IGF2BP3 PE=4 SV=1	8	NaN	38	0	38	46
163	>tr|A0A0D9RAB6|A0A0D9RAB6_CHLSB 40S ribosomal protein S24 OS=Chlorocebus sabaeus GN=RPS24 PE=3 SV=1	14	8	37	0	37	59
164	>tr|A0A0D9R7L4|A0A0D9R7L4_CHLSB tRNA-splicing ligase RtcB homolog OS=Chlorocebus sabaeus GN=RTCB PE=3 SV=1	NaN	NaN	37	0	37	37
165	>tr|A0A0D9RE26|A0A0D9RE26_CHLSB Uncharacterized protein OS=Chlorocebus sabaeus GN=SPECC1L-ADORA2A PE=4 SV=1	NaN	NaN	37	0	37	37
166	>tr|A0A0D9RPE9|A0A0D9RPE9_CHLSB Uncharacterized protein OS=Chlorocebus sabaeus GN=HNRNPA3 PE=4 SV=1	NaN	NaN	37	0	37	37
167	>tr|A0A0D9RVE4|A0A0D9RVE4_CHLSB Uncharacterized protein OS=Chlorocebus sabaeus GN=OBSCN PE=4 SV=1	36	36	23	0	36	95
168	>tr|A0A0D9SB62|A0A0D9SB62_CHLSB Uncharacterized protein OS=Chlorocebus sabaeus GN=RPS25 PE=4 SV=1	18	19	36	0	36	73
169	>VP7 (RRV-9- 326aa):	NaN	36	18	0	36	54
170	>tr|A0A0D9RGT8|A0A0D9RGT8_CHLSB Uncharacterized protein (Fragment) OS=Chlorocebus sabaeus GN=PRRC2C PE=4 SV=1	NaN	NaN	36	0	36	36
171	>tr|A0A0D9R4K7|A0A0D9R4K7_CHLSB Uncharacterized protein OS=Chlorocebus sabaeus GN=FMR1 PE=4 SV=1	12	16	35	0	35	63
172	>tr|A0A0D9RRS4|A0A0D9RRS4_CHLSB Uncharacterized protein (Fragment) OS=Chlorocebus sabaeus GN=ARHGAP6 PE=4 SV=1	35	20	NaN	0	35	55
173	>tr|H6U5Q1|H6U5Q1_CHLAE Nucleolin OS=Chlorocebus aethiops PE=2 SV=1	13	6	35	0	35	54
174	>tr|A0A0D9RXR5|A0A0D9RXR5_CHLSB Uncharacterized protein OS=Chlorocebus sabaeus GN=SNRNP200 PE=4 SV=1	9	NaN	35	0	35	44
175	>tr|A0A0D9RNS4|A0A0D9RNS4_CHLSB Oxysterol-binding protein OS=Chlorocebus sabaeus GN=OSBPL3 PE=3 SV=1	35	NaN	NaN	0	35	35
176	>tr|A0A0D9QXJ7|A0A0D9QXJ7_CHLSB Uncharacterized protein OS=Chlorocebus sabaeus GN=PLEKHA7 PE=4 SV=1	NaN	NaN	34	0	34	34
177	>tr|A0A0D9QYV6|A0A0D9QYV6_CHLSB Uncharacterized protein OS=Chlorocebus sabaeus GN=PPP1R9B PE=4 SV=1	NaN	NaN	34	0	34	34
178	>tr|A0A0D9RZ20|A0A0D9RZ20_CHLSB Uncharacterized protein OS=Chlorocebus sabaeus GN=DSG1 PE=4 SV=1	32	33	6	0	33	71
179	>tr|A0A0D9RTU4|A0A0D9RTU4_CHLSB Microtubule-associated protein OS=Chlorocebus sabaeus GN=MAP4 PE=4 SV=1	25	NaN	33	0	33	58
180	>tr|A0A0D9QXG4|A0A0D9QXG4_CHLSB Uncharacterized protein OS=Chlorocebus sabaeus GN=CNOT1 PE=4 SV=1	14	NaN	33	0	33	47
181	>tr|A0A0D9R6W3|A0A0D9R6W3_CHLSB Uncharacterized protein OS=Chlorocebus sabaeus GN=BANF1 PE=4 SV=1	NaN	NaN	33	0	33	33
182	>tr|A0A0D9RZQ0|A0A0D9RZQ0_CHLSB Uncharacterized protein OS=Chlorocebus sabaeus GN=SLC25A6 PE=3 SV=1	19	32	12	0	32	63
183	>tr|A0A0D9S7K7|A0A0D9S7K7_CHLSB Uncharacterized protein (Fragment) OS=Chlorocebus sabaeus GN=YBX1 PE=4 SV=1	16	11	32	0	32	59
184	>tr|A0A0D9R0F2|A0A0D9R0F2_CHLSB Uncharacterized protein OS=Chlorocebus sabaeus GN=HDLBP PE=4 SV=1	NaN	11	32	0	32	43
185	>tr|A0A0D9RII9|A0A0D9RII9_CHLSB Uncharacterized protein (Fragment) OS=Chlorocebus sabaeus PE=3 SV=1	NaN	10	32	0	32	42
186	>tr|A0A0D9QXD5|A0A0D9QXD5_CHLSB Uncharacterized protein OS=Chlorocebus sabaeus GN=G3BP2 PE=4 SV=1	NaN	9	32	0	32	41
187	>tr|A0A0D9R1X9|A0A0D9R1X9_CHLSB DNA ligase OS=Chlorocebus sabaeus GN=LIG3 PE=3 SV=1	NaN	NaN	32	0	32	32
188	>tr|A0A0D9RN25|A0A0D9RN25_CHLSB Uncharacterized protein OS=Chlorocebus sabaeus GN=SYNE2 PE=4 SV=1	NaN	NaN	32	0	32	32
189	>tr|A0A0D9R3P2|A0A0D9R3P2_CHLSB Uncharacterized protein OS=Chlorocebus sabaeus GN=RPS7 PE=4 SV=1	16	17	31	0	31	64
190	>tr|A0A0D9SC26|A0A0D9SC26_CHLSB Uncharacterized protein OS=Chlorocebus sabaeus GN=RPL17 PE=3 SV=1	15	10	31	0	31	56
191	>tr|A0A0D9SAG1|A0A0D9SAG1_CHLSB Uncharacterized protein OS=Chlorocebus sabaeus GN=RPL23A PE=3 SV=1	21	NaN	31	0	31	52
192	>tr|A0A0D9QVD3|A0A0D9QVD3_CHLSB Uncharacterized protein OS=Chlorocebus sabaeus GN=EDC4 PE=4 SV=1	9	NaN	31	0	31	40
193	>tr|A0A0D9RIJ4|A0A0D9RIJ4_CHLSB Structural maintenance of chromosomes protein OS=Chlorocebus sabaeus GN=SMC4 PE=3 SV=1	6	3	31	0	31	40
194	>tr|A0A0D9RE27|A0A0D9RE27_CHLSB Serine/threonine-protein phosphatase OS=Chlorocebus sabaeus GN=PPP1CB PE=3 SV=1	NaN	NaN	31	0	31	31
195	>tr|A0A0D9S1Y8|A0A0D9S1Y8_CHLSB Ubiquitin carboxyl-terminal hydrolase (Fragment) OS=Chlorocebus sabaeus GN=USP10 PE=3 SV=1	NaN	NaN	31	0	31	31
196	>tr|A0A0D9S9I8|A0A0D9S9I8_CHLSB 60S ribosomal protein L13 OS=Chlorocebus sabaeus GN=RPL13 PE=3 SV=1	30	13	27	0	30	70
197	>tr|A0A0D9RN81|A0A0D9RN81_CHLSB Uncharacterized protein OS=Chlorocebus sabaeus GN=PRPF8 PE=4 SV=1	7	NaN	30	0	30	37
198	>tr|A0A0D9R5A7|A0A0D9R5A7_CHLSB Uncharacterized protein OS=Chlorocebus sabaeus PE=4 SV=1	NaN	NaN	30	0	30	30
199	>tr|A0A0D9SCH7|A0A0D9SCH7_CHLSB Uncharacterized protein OS=Chlorocebus sabaeus GN=RPL13A PE=3 SV=1	NaN	NaN	30	0	30	30
200	>tr|A0A0D9RMF3|A0A0D9RMF3_CHLSB Uncharacterized protein OS=Chlorocebus sabaeus GN=HSPA5 PE=3 SV=1	29	11	18	0	29	58
201	>tr|A0A0D9S1Z5|A0A0D9S1Z5_CHLSB Uncharacterized protein OS=Chlorocebus sabaeus GN=SNRPD2 PE=4 SV=1	12	29	13	0	29	54
202	>tr|Q0QXC0|Q0QXC0_CHLAE Supervillin isoform 1 (Fragment) OS=Chlorocebus aethiops GN=SVIL PE=2 SV=1	NaN	10	29	0	29	39
203	>tr|A0A0D9S0W9|A0A0D9S0W9_CHLSB Uncharacterized protein OS=Chlorocebus sabaeus GN=HNRNPUL1 PE=4 SV=1	9	NaN	29	0	29	38
204	>tr|A0A0D9QWP1|A0A0D9QWP1_CHLSB Uncharacterized protein OS=Chlorocebus sabaeus GN=MKI67 PE=4 SV=1	NaN	NaN	29	0	29	29
205	>tr|A0A0D9R0M1|A0A0D9R0M1_CHLSB Uncharacterized protein OS=Chlorocebus sabaeus GN=PRR11 PE=4 SV=1	NaN	NaN	29	0	29	29
206	>tr|A0A0D9RX79|A0A0D9RX79_CHLSB Uncharacterized protein OS=Chlorocebus sabaeus GN=MFGE8 PE=4 SV=1	NaN	NaN	29	0	29	29
207	>tr|A0A0D9S3T6|A0A0D9S3T6_CHLSB Uncharacterized protein OS=Chlorocebus sabaeus GN=RPS11 PE=3 SV=1	18	26	28	0	28	72
208	>tr|A0A0D9S7H2|A0A0D9S7H2_CHLSB 40S ribosomal protein S8 OS=Chlorocebus sabaeus GN=RPS8 PE=3 SV=1	9	6	28	0	28	43
209	>tr|A0A0D9RPI8|A0A0D9RPI8_CHLSB Uncharacterized protein OS=Chlorocebus sabaeus GN=RBM5 PE=4 SV=1	28	5	4	0	28	37
210	>tr|A0A0D9RL86|A0A0D9RL86_CHLSB Uncharacterized protein OS=Chlorocebus sabaeus GN=RPL4 PE=4 SV=1	6	2	28	0	28	36
211	>tr|A0A0D9QXK4|A0A0D9QXK4_CHLSB Uncharacterized protein OS=Chlorocebus sabaeus GN=PIK3C2A PE=4 SV=1	NaN	NaN	28	0	28	28
212	>tr|A0A0D9R4M0|A0A0D9R4M0_CHLSB Uncharacterized protein OS=Chlorocebus sabaeus GN=GOLGB1 PE=4 SV=1	NaN	28	NaN	0	28	28
213	>tr|A0A0D9RRD3|A0A0D9RRD3_CHLSB Uncharacterized protein OS=Chlorocebus sabaeus GN=C14orf166 PE=4 SV=1	NaN	NaN	28	0	28	28
214	>tr|A0A0D9S2A3|A0A0D9S2A3_CHLSB Uncharacterized protein OS=Chlorocebus sabaeus GN=CALM3 PE=4 SV=1	28	NaN	NaN	0	28	28
215	>tr|A0A0D9S0X5|A0A0D9S0X5_CHLSB Uncharacterized protein OS=Chlorocebus sabaeus GN=SLC25A3 PE=3 SV=1	7	27	19	0	27	53
216	>tr|A0A0D9RJ20|A0A0D9RJ20_CHLSB Uncharacterized protein OS=Chlorocebus sabaeus GN=HSP90AB1 PE=3 SV=1	9	14	27	0	27	50
217	>tr|A0A0D9RHQ0|A0A0D9RHQ0_CHLSB Uncharacterized protein OS=Chlorocebus sabaeus GN=MSN PE=4 SV=1	3	13	27	0	27	43
218	>tr|A0A0D9S125|A0A0D9S125_CHLSB Uncharacterized protein OS=Chlorocebus sabaeus GN=LSM12 PE=4 SV=1	8	8	27	0	27	43
219	>tr|A0A0D9RY97|A0A0D9RY97_CHLSB Uncharacterized protein OS=Chlorocebus sabaeus GN=RALBP1 PE=4 SV=1	27	13	NaN	0	27	40
220	>tr|A0A0D9R0Q0|A0A0D9R0Q0_CHLSB Protein-tyrosine-phosphatase OS=Chlorocebus sabaeus GN=PTPRJ PE=4 SV=1	NaN	27	NaN	0	27	27
221	>tr|A0A0D9RSS3|A0A0D9RSS3_CHLSB Uncharacterized protein OS=Chlorocebus sabaeus GN=GNAS PE=4 SV=1	NaN	NaN	27	0	27	27
222	>tr|A0A0D9R9L1|A0A0D9R9L1_CHLSB Uncharacterized protein OS=Chlorocebus sabaeus PE=4 SV=1	26	20	18	0	26	64
223	>tr|A0A0D9RGJ5|A0A0D9RGJ5_CHLSB Uncharacterized protein OS=Chlorocebus sabaeus GN=RPS14 PE=3 SV=1	14	13	26	0	26	53
224	>tr|A0A0D9SCL9|A0A0D9SCL9_CHLSB Histone H2A OS=Chlorocebus sabaeus GN=HIST1H2AE PE=3 SV=1	NaN	26	21	0	26	47
225	>tr|A0A0D9R4H1|A0A0D9R4H1_CHLSB Uncharacterized protein OS=Chlorocebus sabaeus GN=IARS PE=3 SV=1	8	NaN	26	0	26	34
226	>tr|A0A0D9RPC3|A0A0D9RPC3_CHLSB Uncharacterized protein OS=Chlorocebus sabaeus GN=GNAI2 PE=4 SV=1	NaN	8	26	0	26	34
227	>tr|A0A0D9SAV7|A0A0D9SAV7_CHLSB Uncharacterized protein OS=Chlorocebus sabaeus PE=4 SV=1	4	NaN	26	0	26	30
228	>tr|A0A0D9RIV1|A0A0D9RIV1_CHLSB Uncharacterized protein OS=Chlorocebus sabaeus GN=RPL30 PE=3 SV=1	1	NaN	26	0	26	27
229	>tr|A0A0D9R056|A0A0D9R056_CHLSB Uncharacterized protein OS=Chlorocebus sabaeus GN=CKAP5 PE=4 SV=1	NaN	NaN	26	0	26	26
230	>tr|A0A0D9RC78|A0A0D9RC78_CHLSB Ribosomal protein OS=Chlorocebus sabaeus GN=RPL10A PE=3 SV=1	NaN	NaN	26	0	26	26
231	>tr|A0A0D9QV09|A0A0D9QV09_CHLSB Uncharacterized protein OS=Chlorocebus sabaeus GN=RPS16 PE=3 SV=1	15	19	25	0	25	59
232	>tr|A0A0D9R9A4|A0A0D9R9A4_CHLSB Uncharacterized protein OS=Chlorocebus sabaeus GN=ARPC2 PE=4 SV=1	NaN	14	25	0	25	39
233	>tr|A0A0D9R2U6|A0A0D9R2U6_CHLSB Uncharacterized protein OS=Chlorocebus sabaeus GN=DDX17 PE=3 SV=1	9	NaN	25	0	25	34
234	>tr|A0A0D9S6E7|A0A0D9S6E7_CHLSB Uncharacterized protein (Fragment) OS=Chlorocebus sabaeus GN=CAPZA1 PE=4 SV=1	NaN	7	25	0	25	32
235	>tr|A0A0D9SBE5|A0A0D9SBE5_CHLSB Uncharacterized protein OS=Chlorocebus sabaeus GN=RPL3 PE=3 SV=1	5	2	25	0	25	32
236	>tr|A0A0D9SC74|A0A0D9SC74_CHLSB Uncharacterized protein OS=Chlorocebus sabaeus GN=DYNLL1 PE=4 SV=1	NaN	25	6	0	25	31
237	>tr|G4XXN2|G4XXN2_CHLAE Cytochrome c OS=Chlorocebus aethiops GN=CYCS PE=3 SV=1	2	NaN	25	0	25	27
238	>tr|A0A0D9R6N8|A0A0D9R6N8_CHLSB Uncharacterized protein OS=Chlorocebus sabaeus GN=GNB2L1 PE=4 SV=1	NaN	NaN	25	0	25	25
239	>tr|A0A0D9RMZ0|A0A0D9RMZ0_CHLSB Uncharacterized protein OS=Chlorocebus sabaeus GN=RPA1 PE=4 SV=1	NaN	NaN	25	0	25	25
240	>tr|A0A0D9S6R4|A0A0D9S6R4_CHLSB Uncharacterized protein OS=Chlorocebus sabaeus GN=RPL5 PE=4 SV=1	NaN	NaN	25	0	25	25
241	>tr|A0A0D9SCL5|A0A0D9SCL5_CHLSB Histone H2B OS=Chlorocebus sabaeus GN=HIST1H2BE PE=3 SV=1	20	24	4	0	24	48
242	>tr|A0A0D9S0W5|A0A0D9S0W5_CHLSB Uncharacterized protein OS=Chlorocebus sabaeus GN=NEDD1 PE=4 SV=1	18	2	24	0	24	44
243	>tr|A0A0D9S9G6|A0A0D9S9G6_CHLSB Uncharacterized protein OS=Chlorocebus sabaeus GN=HNRNPA0 PE=4 SV=1	5	13	24	0	24	42
244	>tr|A0A0D9RG34|A0A0D9RG34_CHLSB Uncharacterized protein OS=Chlorocebus sabaeus PE=4 SV=1	4	NaN	24	0	24	28
245	>tr|A0A0D9QVC3|A0A0D9QVC3_CHLSB Uncharacterized protein OS=Chlorocebus sabaeus GN=HNRNPL PE=4 SV=1	NaN	NaN	24	0	24	24
246	>tr|A0A0D9RXB8|A0A0D9RXB8_CHLSB Uncharacterized protein OS=Chlorocebus sabaeus PE=4 SV=1	NaN	NaN	24	0	24	24
247	>tr|A0A0D9S3N6|A0A0D9S3N6_CHLSB Uncharacterized protein OS=Chlorocebus sabaeus GN=PHLDB1 PE=4 SV=1	NaN	NaN	24	0	24	24
248	>tr|A0A0D9SB97|A0A0D9SB97_CHLSB 60S ribosomal protein L36 OS=Chlorocebus sabaeus GN=RPL36 PE=3 SV=1	NaN	NaN	24	0	24	24
249	>tr|A0A0D9QXK1|A0A0D9QXK1_CHLSB Uncharacterized protein OS=Chlorocebus sabaeus GN=RPS13 PE=3 SV=1	22	23	22	0	23	67
250	>tr|A0A0D9S6D9|A0A0D9S6D9_CHLSB Uncharacterized protein OS=Chlorocebus sabaeus GN=RPS5 PE=3 SV=1	11	16	23	0	23	50
251	>tr|A0A0D9R2A6|A0A0D9R2A6_CHLSB Uncharacterized protein OS=Chlorocebus sabaeus GN=MYRF PE=4 SV=1	23	6	13	0	23	42
252	>tr|A0A0D9S602|A0A0D9S602_CHLSB Uncharacterized protein OS=Chlorocebus sabaeus PE=4 SV=1	NaN	10	23	0	23	33
253	>tr|A0A0D9SBL4|A0A0D9SBL4_CHLSB Uncharacterized protein OS=Chlorocebus sabaeus PE=4 SV=1	4	3	23	0	23	30
254	>tr|A0A0D9R2K8|A0A0D9R2K8_CHLSB Uncharacterized protein OS=Chlorocebus sabaeus GN=PHLDB2 PE=4 SV=1	NaN	NaN	23	0	23	23
255	>tr|A0A0D9RBC2|A0A0D9RBC2_CHLSB Uncharacterized protein OS=Chlorocebus sabaeus GN=NIPSNAP1 PE=4 SV=1	NaN	23	NaN	0	23	23
256	>tr|A0A0D9RM68|A0A0D9RM68_CHLSB Uncharacterized protein OS=Chlorocebus sabaeus GN=SYNE1 PE=4 SV=1	NaN	NaN	23	0	23	23
257	>tr|A0A0D9RWA2|A0A0D9RWA2_CHLSB Uncharacterized protein OS=Chlorocebus sabaeus GN=SNRPA1 PE=4 SV=1	14	22	16	0	22	52
258	>tr|A0A0D9R933|A0A0D9R933_CHLSB Uncharacterized protein OS=Chlorocebus sabaeus GN=EPPK1 PE=4 SV=1	12	22	15	0	22	49
259	>tr|A0A0D9S7P0|A0A0D9S7P0_CHLSB Polyadenylate-binding protein OS=Chlorocebus sabaeus GN=PABPC4 PE=3 SV=1	18	3	22	0	22	43
260	>tr|A0A0D9S4P1|A0A0D9S4P1_CHLSB Uncharacterized protein OS=Chlorocebus sabaeus GN=MYH14 PE=4 SV=1	7	22	13	0	22	42
261	>tr|A0A0D9RDV7|A0A0D9RDV7_CHLSB Uncharacterized protein OS=Chlorocebus sabaeus GN=ARPC4 PE=4 SV=1	NaN	19	22	0	22	41
262	>tr|A0A0D9SBL0|A0A0D9SBL0_CHLSB 60S ribosomal protein L6 OS=Chlorocebus sabaeus PE=3 SV=1	13	6	22	0	22	41
263	>tr|A0A0D9S197|A0A0D9S197_CHLSB Uncharacterized protein OS=Chlorocebus sabaeus GN=HSD17B2 PE=3 SV=1	NaN	5	22	0	22	27
264	>tr|A0A0D9RQK6|A0A0D9RQK6_CHLSB Uncharacterized protein OS=Chlorocebus sabaeus GN=ACTR2 PE=3 SV=1	NaN	NaN	22	0	22	22
265	>tr|A0A0D9S9H0|A0A0D9S9H0_CHLSB Uncharacterized protein OS=Chlorocebus sabaeus GN=PURA PE=4 SV=1	NaN	NaN	22	0	22	22
266	>tr|A0A0D9S4H3|A0A0D9S4H3_CHLSB Uncharacterized protein OS=Chlorocebus sabaeus GN=GCN1L1 PE=4 SV=1	NaN	21	21	0	21	42
267	>tr|A0A0D9RLW4|A0A0D9RLW4_CHLSB ATP synthase subunit gamma OS=Chlorocebus sabaeus GN=ATP5C1 PE=3 SV=1	NaN	21	20	0	21	41
268	>tr|A0A0D9RWG7|A0A0D9RWG7_CHLSB Uncharacterized protein OS=Chlorocebus sabaeus GN=RPL14 PE=4 SV=1	5	10	21	0	21	36
269	>tr|A0A0D9R787|A0A0D9R787_CHLSB Uncharacterized protein OS=Chlorocebus sabaeus GN=RPL8 PE=3 SV=1	12	NaN	21	0	21	33
270	>tr|A0A0D9R825|A0A0D9R825_CHLSB Uncharacterized protein OS=Chlorocebus sabaeus GN=MPRIP PE=4 SV=1	NaN	12	21	0	21	33
271	>tr|A0A0D9RR49|A0A0D9RR49_CHLSB Uncharacterized protein OS=Chlorocebus sabaeus GN=STAU1 PE=4 SV=1	6	6	21	0	21	33
272	>tr|A0A0D9RGV0|A0A0D9RGV0_CHLSB Uncharacterized protein OS=Chlorocebus sabaeus GN=RRBP1 PE=4 SV=1	10	NaN	21	0	21	31
273	>tr|A0A0D9S5R4|A0A0D9S5R4_CHLSB Uncharacterized protein (Fragment) OS=Chlorocebus sabaeus GN=PGAM5 PE=4 SV=1	NaN	10	21	0	21	31
274	>tr|A0A0D9RD03|A0A0D9RD03_CHLSB Uncharacterized protein OS=Chlorocebus sabaeus GN=VCP PE=3 SV=1	21	NaN	NaN	0	21	21
275	>tr|A0A0D9RRR5|A0A0D9RRR5_CHLSB Uncharacterized protein (Fragment) OS=Chlorocebus sabaeus PE=4 SV=1	NaN	NaN	21	0	21	21
276	>tr|A0A0D9S5T5|A0A0D9S5T5_CHLSB Uncharacterized protein OS=Chlorocebus sabaeus GN=CGN PE=4 SV=1	NaN	NaN	21	0	21	21
277	>tr|A0A0D9S6D8|A0A0D9S6D8_CHLSB Uncharacterized protein OS=Chlorocebus sabaeus GN=MOV10 PE=4 SV=1	NaN	NaN	21	0	21	21
278	>tr|A0A0D9S9U1|A0A0D9S9U1_CHLSB Uncharacterized protein OS=Chlorocebus sabaeus PE=4 SV=1	NaN	NaN	21	0	21	21
279	>tr|A0A0D9R5N6|A0A0D9R5N6_CHLSB Uncharacterized protein OS=Chlorocebus sabaeus GN=FAU PE=4 SV=1	15	17	20	0	20	52
280	>tr|A0A0D9RZV8|A0A0D9RZV8_CHLSB Uncharacterized protein OS=Chlorocebus sabaeus GN=SF3B4 PE=4 SV=1	15	20	12	0	20	47
281	>tr|A3R0T6|A3R0T6_CHLAE Histone H1e OS=Chlorocebus aethiops PE=2 SV=1	20	3	19	0	20	42
282	>tr|A0A0D9RX05|A0A0D9RX05_CHLSB Uncharacterized protein OS=Chlorocebus sabaeus GN=UTRN PE=4 SV=1	NaN	13	20	0	20	33
283	>tr|A0A0D9QZZ8|A0A0D9QZZ8_CHLSB Uncharacterized protein OS=Chlorocebus sabaeus GN=KRT77 PE=3 SV=1	7	20	NaN	0	20	27
284	>tr|A0A0D9RNT7|A0A0D9RNT7_CHLSB Uncharacterized protein OS=Chlorocebus sabaeus PE=4 SV=1	20	NaN	NaN	0	20	20
285	>tr|A0A0D9S2N6|A0A0D9S2N6_CHLSB Uncharacterized protein OS=Chlorocebus sabaeus GN=FAT1 PE=4 SV=1	18	NaN	19	0	19	37
286	>tr|A0A0D9RSU9|A0A0D9RSU9_CHLSB Uncharacterized protein OS=Chlorocebus sabaeus GN=COL5A1 PE=4 SV=1	NaN	17	19	0	19	36
287	>tr|A0A0D9S618|A0A0D9S618_CHLSB Uncharacterized protein OS=Chlorocebus sabaeus GN=U2AF2 PE=4 SV=1	6	NaN	19	0	19	25
288	>tr|A0A0D9R4I4|A0A0D9R4I4_CHLSB Uncharacterized protein OS=Chlorocebus sabaeus GN=THBS1 PE=4 SV=1	NaN	5	19	0	19	24
289	>tr|A0A0D9QVV3|A0A0D9QVV3_CHLSB Uncharacterized protein OS=Chlorocebus sabaeus GN=HELZ PE=4 SV=1	NaN	NaN	19	0	19	19
290	>tr|A0A0D9QVV9|A0A0D9QVV9_CHLSB Uncharacterized protein OS=Chlorocebus sabaeus PE=4 SV=1	NaN	NaN	19	0	19	19
291	>tr|A0A0D9RQA2|A0A0D9RQA2_CHLSB Uncharacterized protein OS=Chlorocebus sabaeus GN=ASCC3 PE=4 SV=1	NaN	NaN	19	0	19	19
292	>tr|A0A0D9RQS0|A0A0D9RQS0_CHLSB Uncharacterized protein OS=Chlorocebus sabaeus GN=PRRC2B PE=4 SV=1	NaN	NaN	19	0	19	19
293	>tr|A0A0D9RTC1|A0A0D9RTC1_CHLSB Uncharacterized protein OS=Chlorocebus sabaeus GN=TNS3 PE=4 SV=1	NaN	NaN	19	0	19	19
294	>tr|A0A0D9RVN0|A0A0D9RVN0_CHLSB Uncharacterized protein OS=Chlorocebus sabaeus GN=TUBB4B PE=3 SV=1	18	16	18	0	18	52
295	>tr|A0A0D9S1C8|A0A0D9S1C8_CHLSB 60S ribosomal protein L27 OS=Chlorocebus sabaeus GN=RPL27 PE=3 SV=1	11	18	16	0	18	45
296	>tr|A0A0D9R082|A0A0D9R082_CHLSB Uncharacterized protein OS=Chlorocebus sabaeus GN=FUS PE=4 SV=1	11	11	18	0	18	40
297	>tr|A0A0D9RFF1|A0A0D9RFF1_CHLSB Uncharacterized protein (Fragment) OS=Chlorocebus sabaeus PE=3 SV=1	9	18	11	0	18	38
298	>tr|A0A0D9RGY4|A0A0D9RGY4_CHLSB Uncharacterized protein OS=Chlorocebus sabaeus GN=SNRPB2 PE=4 SV=1	8	18	9	0	18	35
299	>tr|A0A0D9RV86|A0A0D9RV86_CHLSB Uncharacterized protein OS=Chlorocebus sabaeus GN=ACTR3 PE=3 SV=1	NaN	9	18	0	18	27
300	>tr|A0A0D9RNX3|A0A0D9RNX3_CHLSB Uncharacterized protein OS=Chlorocebus sabaeus PE=4 SV=1	NaN	NaN	18	0	18	18
301	>tr|A0A0D9S2T4|A0A0D9S2T4_CHLSB Uncharacterized protein OS=Chlorocebus sabaeus GN=CRYAB PE=3 SV=1	NaN	NaN	18	0	18	18
302	>tr|A0A0D9S7F9|A0A0D9S7F9_CHLSB Uncharacterized protein OS=Chlorocebus sabaeus GN=PRDX1 PE=4 SV=1	NaN	NaN	18	0	18	18
303	>tr|A0A0D9SAF6|A0A0D9SAF6_CHLSB Uncharacterized protein OS=Chlorocebus sabaeus PE=4 SV=1	NaN	NaN	18	0	18	18
304	>tr|A0A0D9SD82|A0A0D9SD82_CHLSB Uncharacterized protein OS=Chlorocebus sabaeus GN=HSPA1L PE=3 SV=1	18	NaN	NaN	0	18	18
305	>tr|A0A0D9RQZ1|A0A0D9RQZ1_CHLSB Uncharacterized protein OS=Chlorocebus sabaeus GN=RPS23 PE=3 SV=1	11	12	17	0	17	40
306	>tr|A0A0D9S7S6|A0A0D9S7S6_CHLSB Uncharacterized protein OS=Chlorocebus sabaeus GN=THRAP3 PE=4 SV=1	15	5	17	0	17	37
307	>tr|A0A0D9SEF0|A0A0D9SEF0_CHLSB Uncharacterized protein OS=Chlorocebus sabaeus PE=4 SV=1	NaN	11	17	0	17	28
308	>tr|A0A0D9QZV6|A0A0D9QZV6_CHLSB Uncharacterized protein OS=Chlorocebus sabaeus GN=KRT78 PE=3 SV=1	17	2	4	0	17	23
309	>tr|A0A0D9RIN0|A0A0D9RIN0_CHLSB Uncharacterized protein OS=Chlorocebus sabaeus GN=DLST PE=3 SV=1	17	5	NaN	0	17	22
310	>tr|A0A0D9R3W4|A0A0D9R3W4_CHLSB Uncharacterized protein OS=Chlorocebus sabaeus GN=TRIP12 PE=4 SV=1	NaN	NaN	17	0	17	17
311	>tr|A0A0D9R8T1|A0A0D9R8T1_CHLSB Uncharacterized protein OS=Chlorocebus sabaeus GN=PDLIM7 PE=4 SV=1	NaN	NaN	17	0	17	17
312	>tr|A0A0D9RY55|A0A0D9RY55_CHLSB Uncharacterized protein OS=Chlorocebus sabaeus GN=DOCK9 PE=4 SV=1	NaN	NaN	17	0	17	17
313	>tr|A0A0D9RZB5|A0A0D9RZB5_CHLSB Uncharacterized protein OS=Chlorocebus sabaeus GN=GNB2 PE=4 SV=1	NaN	NaN	17	0	17	17
314	>tr|A0A0D9SA89|A0A0D9SA89_CHLSB Histone H2A OS=Chlorocebus sabaeus GN=HIST2H2AC PE=3 SV=1	17	NaN	NaN	0	17	17
315	>tr|A0A0D9R1R4|A0A0D9R1R4_CHLSB Uncharacterized protein OS=Chlorocebus sabaeus GN=RPL24 PE=4 SV=1	7	16	15	0	16	38
316	>tr|A0A0D9QYM3|A0A0D9QYM3_CHLSB Uncharacterized protein OS=Chlorocebus sabaeus GN=NUDT21 PE=4 SV=1	2	12	16	0	16	30
317	>tr|A0A0D9R9X4|A0A0D9R9X4_CHLSB Uncharacterized protein OS=Chlorocebus sabaeus GN=FN1 PE=4 SV=1	16	8	5	0	16	29
318	>tr|A0A0D9SCR9|A0A0D9SCR9_CHLSB Uncharacterized protein OS=Chlorocebus sabaeus GN=RPL31 PE=4 SV=1	6	5	16	0	16	27
319	>tr|A0A0D9R8N7|A0A0D9R8N7_CHLSB Uncharacterized protein OS=Chlorocebus sabaeus GN=B4GALT7 PE=4 SV=1	9	NaN	16	0	16	25
320	>tr|A0A0D9RQ30|A0A0D9RQ30_CHLSB Uncharacterized protein OS=Chlorocebus sabaeus GN=RPS20 PE=3 SV=1	8	NaN	16	0	16	24
321	>tr|A0A0D9R464|A0A0D9R464_CHLSB Uncharacterized protein OS=Chlorocebus sabaeus PE=3 SV=1	NaN	16	NaN	0	16	16
322	>tr|A0A0D9R869|A0A0D9R869_CHLSB Serine/threonine-protein phosphatase OS=Chlorocebus sabaeus GN=PPP1CA PE=3 SV=1	NaN	NaN	16	0	16	16
323	>tr|A0A0D9R981|A0A0D9R981_CHLSB Uncharacterized protein OS=Chlorocebus sabaeus GN=PPL PE=4 SV=1	NaN	NaN	16	0	16	16
324	>tr|A0A0D9RCZ4|A0A0D9RCZ4_CHLSB Uncharacterized protein OS=Chlorocebus sabaeus GN=HSP90AA1 PE=4 SV=1	16	NaN	NaN	0	16	16
325	>tr|A0A0D9RGI6|A0A0D9RGI6_CHLSB Clathrin heavy chain OS=Chlorocebus sabaeus GN=CLTCL1 PE=3 SV=1	NaN	NaN	16	0	16	16
326	>tr|A0A0D9RQH8|A0A0D9RQH8_CHLSB Uncharacterized protein OS=Chlorocebus sabaeus GN=FUBP3 PE=4 SV=1	NaN	NaN	16	0	16	16
327	>tr|A0A0D9RYT4|A0A0D9RYT4_CHLSB Uncharacterized protein OS=Chlorocebus sabaeus GN=TECPR1 PE=4 SV=1	NaN	NaN	16	0	16	16
328	>tr|A0A0D9RZC5|A0A0D9RZC5_CHLSB Uncharacterized protein OS=Chlorocebus sabaeus GN=HSPH1 PE=3 SV=1	NaN	NaN	16	0	16	16
329	>tr|A0A0D9S8B1|A0A0D9S8B1_CHLSB Uncharacterized protein OS=Chlorocebus sabaeus GN=HSPG2 PE=4 SV=1	NaN	NaN	16	0	16	16
330	>tr|A0A0D9R7Q9|A0A0D9R7Q9_CHLSB Uncharacterized protein OS=Chlorocebus sabaeus GN=SF3B6 PE=4 SV=1	14	15	15	0	15	44
331	>tr|A0A0D9RKY9|A0A0D9RKY9_CHLSB Uncharacterized protein OS=Chlorocebus sabaeus GN=HSPA9 PE=3 SV=1	15	14	14	0	15	43
332	>tr|A0A0D9RGH7|A0A0D9RGH7_CHLSB Uncharacterized protein OS=Chlorocebus sabaeus GN=MYO5A PE=4 SV=1	14	11	15	0	15	40
333	>tr|A0A0D9RAL5|A0A0D9RAL5_CHLSB 40S ribosomal protein S6 OS=Chlorocebus sabaeus GN=RPS6 PE=3 SV=1	13	6	15	0	15	34
334	>tr|A0A0D9R030|A0A0D9R030_CHLSB Uncharacterized protein OS=Chlorocebus sabaeus GN=KRT72 PE=3 SV=1	6	15	9	0	15	30
335	>tr|A0A0D9S109|A0A0D9S109_CHLSB Uncharacterized protein OS=Chlorocebus sabaeus GN=RPS19 PE=4 SV=1	8	7	15	0	15	30
336	>tr|A0A0D9R1I4|A0A0D9R1I4_CHLSB Uncharacterized protein OS=Chlorocebus sabaeus GN=CCDC105 PE=4 SV=1	NaN	15	11	0	15	26
337	>NSP5 (RRV-11- 198aa):	NaN	15	10	0	15	25
338	>tr|A0A0D9RVQ9|A0A0D9RVQ9_CHLSB Arginase OS=Chlorocebus sabaeus GN=ARG1 PE=3 SV=1	5	15	3	0	15	23
339	>tr|A0A0D9S913|A0A0D9S913_CHLSB Uncharacterized protein OS=Chlorocebus sabaeus GN=RPS27 PE=3 SV=1	NaN	3	15	0	15	18
340	>tr|A0A0D9SE44|A0A0D9SE44_CHLSB Uncharacterized protein OS=Chlorocebus sabaeus GN=RPS26 PE=4 SV=1	1	1	15	0	15	17
341	>tr|A0A0D9QWT3|A0A0D9QWT3_CHLSB Uncharacterized protein OS=Chlorocebus sabaeus GN=IPO7 PE=4 SV=1	NaN	NaN	15	0	15	15
342	>tr|A0A0D9QZD7|A0A0D9QZD7_CHLSB Catalase OS=Chlorocebus sabaeus GN=CAT PE=3 SV=1	NaN	15	NaN	0	15	15
343	>tr|A0A0D9R0V0|A0A0D9R0V0_CHLSB Uncharacterized protein OS=Chlorocebus sabaeus GN=TNKS1BP1 PE=4 SV=1	NaN	NaN	15	0	15	15
344	>tr|A0A0D9R4T8|A0A0D9R4T8_CHLSB Uncharacterized protein OS=Chlorocebus sabaeus GN=PKP2 PE=4 SV=1	NaN	NaN	15	0	15	15
345	>tr|A0A0D9RAD3|A0A0D9RAD3_CHLSB Uncharacterized protein OS=Chlorocebus sabaeus GN=C3 PE=4 SV=1	15	NaN	NaN	0	15	15
346	>tr|A0A0D9RFT3|A0A0D9RFT3_CHLSB Uncharacterized protein OS=Chlorocebus sabaeus GN=XRN1 PE=4 SV=1	NaN	NaN	15	0	15	15
347	>tr|A0A0D9RH15|A0A0D9RH15_CHLSB Eukaryotic translation initiation factor 3 subunit E OS=Chlorocebus sabaeus GN=EIF3E PE=3 SV=1	NaN	NaN	15	0	15	15
348	>tr|A0A0D9RNK1|A0A0D9RNK1_CHLSB Uncharacterized protein OS=Chlorocebus sabaeus GN=TRA2A PE=4 SV=1	NaN	NaN	15	0	15	15
349	>tr|A0A0D9RXA4|A0A0D9RXA4_CHLSB Uncharacterized protein OS=Chlorocebus sabaeus GN=EIF5B PE=4 SV=1	NaN	NaN	15	0	15	15
350	>tr|A0A0D9S2E6|A0A0D9S2E6_CHLSB Uncharacterized protein OS=Chlorocebus sabaeus GN=KRT17 PE=3 SV=1	12	8	14	0	14	34
351	>tr|A0A0D9RDI7|A0A0D9RDI7_CHLSB Uncharacterized protein OS=Chlorocebus sabaeus GN=RPL26 PE=3 SV=1	5	9	14	0	14	28
352	>tr|A0A0D9RNB6|A0A0D9RNB6_CHLSB Uncharacterized protein OS=Chlorocebus sabaeus GN=GPNMB PE=4 SV=1	8	5	14	0	14	27
353	>tr|A0A0D9RBM0|A0A0D9RBM0_CHLSB Ribosomal protein L15 OS=Chlorocebus sabaeus GN=RPL15 PE=3 SV=1	2	6	14	0	14	22
354	>tr|A0A0D9RYW9|A0A0D9RYW9_CHLSB Uncharacterized protein OS=Chlorocebus sabaeus GN=ARPC1A PE=4 SV=1	NaN	4	14	0	14	18
355	>tr|A0A0D9QZI9|A0A0D9QZI9_CHLSB 60S ribosomal protein L18a OS=Chlorocebus sabaeus GN=RPL18A PE=3 SV=1	2	NaN	14	0	14	16
356	>sp|P62938|PPIA_CHLAE Peptidyl-prolyl cis-trans isomerase A OS=Chlorocebus aethiops GN=PPIA PE=2 SV=2	NaN	NaN	14	0	14	14
357	>tr|A0A0D9R6D5|A0A0D9R6D5_CHLSB Uncharacterized protein OS=Chlorocebus sabaeus GN=CMAS PE=4 SV=1	NaN	NaN	14	0	14	14
358	>tr|A0A0D9R7V8|A0A0D9R7V8_CHLSB Uncharacterized protein OS=Chlorocebus sabaeus PE=4 SV=1	NaN	NaN	14	0	14	14
359	>tr|A0A0D9RAI4|A0A0D9RAI4_CHLSB Uncharacterized protein OS=Chlorocebus sabaeus GN=CLASP2 PE=4 SV=1	NaN	NaN	14	0	14	14
360	>tr|A0A0D9RD33|A0A0D9RD33_CHLSB Uncharacterized protein OS=Chlorocebus sabaeus GN=SRSF3 PE=4 SV=1	NaN	NaN	14	0	14	14
361	>tr|A0A0D9RJK6|A0A0D9RJK6_CHLSB Uncharacterized protein OS=Chlorocebus sabaeus GN=CDK6 PE=4 SV=1	NaN	NaN	14	0	14	14
362	>tr|A0A0D9RX52|A0A0D9RX52_CHLSB Uncharacterized protein OS=Chlorocebus sabaeus GN=MAP4K4 PE=4 SV=1	NaN	NaN	14	0	14	14
363	>tr|A0A0D9SA64|A0A0D9SA64_CHLSB Uncharacterized protein OS=Chlorocebus sabaeus GN=APOBEC4 PE=4 SV=1	NaN	14	NaN	0	14	14
364	>tr|A0A0D9SC51|A0A0D9SC51_CHLSB Uncharacterized protein OS=Chlorocebus sabaeus GN=RPL32 PE=4 SV=1	NaN	NaN	14	0	14	14
365	>tr|A0A0D9SE27|A0A0D9SE27_CHLSB Uncharacterized protein OS=Chlorocebus sabaeus PE=3 SV=1	14	NaN	NaN	0	14	14
366	>tr|H2E098|H2E098_CHLPG Apolipoprotein B mRNA editing enzyme- catalytic polypeptide-like 3G OS=Chlorocebus pygerythrus GN=APOBEC3G PE=2 SV=1	NaN	NaN	14	0	14	14
367	>tr|A0A0D9S148|A0A0D9S148_CHLSB Uncharacterized protein OS=Chlorocebus sabaeus GN=CIC PE=4 SV=1	12	8	13	0	13	33
368	>tr|A0A0D9SAU5|A0A0D9SAU5_CHLSB Uncharacterized protein OS=Chlorocebus sabaeus PE=3 SV=1	NaN	13	13	0	13	26
369	>tr|A0A0D9RRX3|A0A0D9RRX3_CHLSB Uncharacterized protein OS=Chlorocebus sabaeus PE=3 SV=1	13	11	NaN	0	13	24
370	>tr|A0A0D9RY59|A0A0D9RY59_CHLSB Uncharacterized protein OS=Chlorocebus sabaeus GN=FARP1 PE=4 SV=1	NaN	9	13	0	13	22
371	>tr|A0A0D9SCL0|A0A0D9SCL0_CHLSB Histone H3 OS=Chlorocebus sabaeus GN=HIST1H3E PE=3 SV=1	13	NaN	9	0	13	22
372	>tr|A0A0D9R381|A0A0D9R381_CHLSB Uncharacterized protein OS=Chlorocebus sabaeus GN=TWF1 PE=4 SV=1	NaN	4	13	0	13	17
373	>tr|A0A0D9R7K5|A0A0D9R7K5_CHLSB Uncharacterized protein OS=Chlorocebus sabaeus GN=SQSTM1 PE=4 SV=1	NaN	NaN	13	0	13	13
374	>tr|A0A0D9R9R9|A0A0D9R9R9_CHLSB Uncharacterized protein OS=Chlorocebus sabaeus GN=VDAC2 PE=4 SV=1	NaN	NaN	13	0	13	13
375	>tr|A0A0D9RGI5|A0A0D9RGI5_CHLSB DNA-directed RNA polymerase OS=Chlorocebus sabaeus GN=POLR2A PE=3 SV=1	NaN	NaN	13	0	13	13
376	>tr|A0A0D9RNB8|A0A0D9RNB8_CHLSB Ubiquitin carboxyl-terminal hydrolase OS=Chlorocebus sabaeus GN=USP9X PE=3 SV=1	NaN	NaN	13	0	13	13
377	>tr|A0A0D9RVI8|A0A0D9RVI8_CHLSB Uncharacterized protein OS=Chlorocebus sabaeus PE=4 SV=1	13	NaN	NaN	0	13	13
378	>tr|A0A0D9S1A8|A0A0D9S1A8_CHLSB Uncharacterized protein OS=Chlorocebus sabaeus GN=XRCC1 PE=4 SV=1	NaN	NaN	13	0	13	13
379	>tr|A0A0D9S3C9|A0A0D9S3C9_CHLSB Ribosomal protein L19 OS=Chlorocebus sabaeus GN=RPL19 PE=3 SV=1	NaN	NaN	13	0	13	13
380	>tr|A0A0D9SCP1|A0A0D9SCP1_CHLSB Uncharacterized protein (Fragment) OS=Chlorocebus sabaeus PE=4 SV=1	NaN	NaN	13	0	13	13
381	>tr|A0A0D9RFK0|A0A0D9RFK0_CHLSB Uncharacterized protein OS=Chlorocebus sabaeus GN=THAP5 PE=4 SV=1	11	11	12	0	12	34
382	>tr|A0A0D9RVD5|A0A0D9RVD5_CHLSB Uncharacterized protein OS=Chlorocebus sabaeus PE=4 SV=1	7	12	12	0	12	31
383	>tr|A0A0D9SE18|A0A0D9SE18_CHLSB Uncharacterized protein OS=Chlorocebus sabaeus GN=RPL3 PE=3 SV=1	12	12	7	0	12	31
384	>tr|A0A0D9RYI9|A0A0D9RYI9_CHLSB Uncharacterized protein OS=Chlorocebus sabaeus GN=SNRPD1 PE=4 SV=1	6	12	12	0	12	30
385	>tr|A0A0D9RXQ9|A0A0D9RXQ9_CHLSB Uncharacterized protein OS=Chlorocebus sabaeus GN=SYNCRIP PE=4 SV=1	9	6	12	0	12	27
386	>tr|A0A0D9QWP9|A0A0D9QWP9_CHLSB Uncharacterized protein OS=Chlorocebus sabaeus PE=3 SV=1	7	7	12	0	12	26
387	>tr|A0A0D9RI58|A0A0D9RI58_CHLSB Uncharacterized protein OS=Chlorocebus sabaeus GN=RPS15 PE=3 SV=1	11	2	12	0	12	25
388	>tr|A0A0D9RN36|A0A0D9RN36_CHLSB Uncharacterized protein OS=Chlorocebus sabaeus PE=4 SV=1	6	7	12	0	12	25
389	>tr|A0A0D9RN62|A0A0D9RN62_CHLSB Uncharacterized protein OS=Chlorocebus sabaeus GN=WDR81 PE=4 SV=1	12	7	4	0	12	23
390	>tr|A0A0D9SDI7|A0A0D9SDI7_CHLSB Uncharacterized protein OS=Chlorocebus sabaeus PE=4 SV=1	12	5	6	0	12	23
391	>tr|A0A0D9RKI6|A0A0D9RKI6_CHLSB Uncharacterized protein OS=Chlorocebus sabaeus GN=SLC25A11 PE=3 SV=1	NaN	10	12	0	12	22
392	>tr|A0A0D9R6L7|A0A0D9R6L7_CHLSB Uncharacterized protein OS=Chlorocebus sabaeus PE=4 SV=1	3	6	12	0	12	21
393	>tr|A0A0D9QXX9|A0A0D9QXX9_CHLSB Uncharacterized protein OS=Chlorocebus sabaeus GN=ABLIM1 PE=4 SV=1	NaN	7	12	0	12	19
394	>tr|A0A0D9RXE2|A0A0D9RXE2_CHLSB Protein-L-isoaspartate O-methyltransferase OS=Chlorocebus sabaeus GN=PCMT1 PE=3 SV=1	NaN	4	12	0	12	16
395	>tr|A0A0D9R1H5|A0A0D9R1H5_CHLSB Fructose-bisphosphate aldolase OS=Chlorocebus sabaeus GN=ALDOA PE=3 SV=1	NaN	NaN	12	0	12	12
396	>tr|A0A0D9R1H9|A0A0D9R1H9_CHLSB Uncharacterized protein OS=Chlorocebus sabaeus GN=CASP14 PE=3 SV=1	NaN	12	NaN	0	12	12
397	>tr|A0A0D9RA81|A0A0D9RA81_CHLSB Uncharacterized protein OS=Chlorocebus sabaeus GN=DLG5 PE=4 SV=1	NaN	NaN	12	0	12	12
398	>tr|A0A0D9RBI7|A0A0D9RBI7_CHLSB DNA topoisomerase 2 OS=Chlorocebus sabaeus GN=TOP2B PE=3 SV=1	NaN	NaN	12	0	12	12
399	>tr|A0A0D9RHH6|A0A0D9RHH6_CHLSB Uncharacterized protein OS=Chlorocebus sabaeus GN=GNAI1 PE=4 SV=1	NaN	NaN	12	0	12	12
400	>tr|A0A0D9RW04|A0A0D9RW04_CHLSB Uncharacterized protein OS=Chlorocebus sabaeus GN=PCM1 PE=4 SV=1	NaN	NaN	12	0	12	12
401	>tr|A0A0D9RX51|A0A0D9RX51_CHLSB Kinesin-like protein OS=Chlorocebus sabaeus GN=KIF7 PE=3 SV=1	12	NaN	NaN	0	12	12
402	>tr|A0A0D9S7Y1|A0A0D9S7Y1_CHLSB Uncharacterized protein OS=Chlorocebus sabaeus GN=KHDRBS1 PE=4 SV=1	NaN	NaN	12	0	12	12
403	>tr|A0A0D9SDL3|A0A0D9SDL3_CHLSB Ribosomal protein (Fragment) OS=Chlorocebus sabaeus PE=3 SV=1	NaN	12	NaN	0	12	12
404	>tr|A0A0D9RE72|A0A0D9RE72_CHLSB Uncharacterized protein OS=Chlorocebus sabaeus GN=TF PE=3 SV=1	7	11	8	0	11	26
405	>tr|A0A0D9REP7|A0A0D9REP7_CHLSB Uncharacterized protein OS=Chlorocebus sabaeus GN=EEF2 PE=4 SV=1	9	NaN	11	0	11	20
406	>tr|Q2VIM8|Q2VIM8_CHLSB RBM1 (Fragment) OS=Chlorocebus sabaeus PE=4 SV=1	NaN	6	11	0	11	17
407	>tr|A0A0D9R049|A0A0D9R049_CHLSB Uncharacterized protein OS=Chlorocebus sabaeus GN=KRT71 PE=3 SV=1	11	2	NaN	0	11	13
408	>tr|A0A0D9S8X5|A0A0D9S8X5_CHLSB Uncharacterized protein OS=Chlorocebus sabaeus PE=4 SV=1	NaN	1	11	0	11	12
409	>sp|P33194|DDB1_CHLAE DNA damage-binding protein 1 OS=Chlorocebus aethiops GN=DDB1 PE=1 SV=1	NaN	NaN	11	0	11	11
410	>tr|A0A0D9R241|A0A0D9R241_CHLSB Uncharacterized protein OS=Chlorocebus sabaeus PE=4 SV=1	NaN	11	NaN	0	11	11
411	>tr|A0A0D9R2Q7|A0A0D9R2Q7_CHLSB Uncharacterized protein OS=Chlorocebus sabaeus GN=HECTD2 PE=4 SV=1	NaN	NaN	11	0	11	11
412	>tr|A0A0D9R337|A0A0D9R337_CHLSB Uncharacterized protein OS=Chlorocebus sabaeus GN=SCAF11 PE=4 SV=1	NaN	NaN	11	0	11	11
413	>tr|A0A0D9R4M7|A0A0D9R4M7_CHLSB Uncharacterized protein OS=Chlorocebus sabaeus GN=BICC1 PE=4 SV=1	NaN	NaN	11	0	11	11
414	>tr|A0A0D9R5H3|A0A0D9R5H3_CHLSB Uncharacterized protein OS=Chlorocebus sabaeus GN=MYLK PE=4 SV=1	NaN	NaN	11	0	11	11
415	>tr|A0A0D9R959|A0A0D9R959_CHLSB Uncharacterized protein OS=Chlorocebus sabaeus GN=SCRIB PE=4 SV=1	NaN	NaN	11	0	11	11
416	>tr|A0A0D9RBJ0|A0A0D9RBJ0_CHLSB Uncharacterized protein OS=Chlorocebus sabaeus PE=3 SV=1	NaN	NaN	11	0	11	11
417	>tr|A0A0D9RHG5|A0A0D9RHG5_CHLSB Uncharacterized protein OS=Chlorocebus sabaeus GN=FAM98A PE=4 SV=1	NaN	NaN	11	0	11	11
418	>tr|A0A0D9RJY4|A0A0D9RJY4_CHLSB Uncharacterized protein OS=Chlorocebus sabaeus GN=PLEKHH2 PE=4 SV=1	NaN	NaN	11	0	11	11
419	>tr|A0A0D9RPF2|A0A0D9RPF2_CHLSB Uncharacterized protein OS=Chlorocebus sabaeus GN=CREB5 PE=4 SV=1	NaN	NaN	11	0	11	11
420	>tr|A0A0D9RS70|A0A0D9RS70_CHLSB Uncharacterized protein OS=Chlorocebus sabaeus GN=IQGAP2 PE=4 SV=1	NaN	NaN	11	0	11	11
421	>tr|A0A0D9RUC6|A0A0D9RUC6_CHLSB Uncharacterized protein OS=Chlorocebus sabaeus GN=RAB3C PE=4 SV=1	11	NaN	NaN	0	11	11
422	>tr|A0A0D9RY99|A0A0D9RY99_CHLSB Uncharacterized protein OS=Chlorocebus sabaeus GN=MICALL2 PE=4 SV=1	NaN	NaN	11	0	11	11
423	>tr|A0A0D9S4S3|A0A0D9S4S3_CHLSB Uncharacterized protein OS=Chlorocebus sabaeus GN=NES PE=3 SV=1	NaN	NaN	11	0	11	11
424	>tr|A0A0D9S737|A0A0D9S737_CHLSB Uncharacterized protein OS=Chlorocebus sabaeus GN=DOCK7 PE=4 SV=1	NaN	NaN	11	0	11	11
425	>tr|A0A0D9S9Z2|A0A0D9S9Z2_CHLSB Uncharacterized protein OS=Chlorocebus sabaeus GN=MORF4L2 PE=4 SV=1	NaN	NaN	11	0	11	11
426	>tr|A0A0D9SB72|A0A0D9SB72_CHLSB Uncharacterized protein OS=Chlorocebus sabaeus PE=3 SV=1	NaN	NaN	11	0	11	11
427	>tr|Q5D0W6|Q5D0W6_CHLAE P-glycoprotein OS=Chlorocebus aethiops GN=ABCB1 PE=2 SV=1	NaN	NaN	11	0	11	11
428	>tr|A0A0D9RZ06|A0A0D9RZ06_CHLSB Uncharacterized protein OS=Chlorocebus sabaeus GN=DSC1 PE=4 SV=1	7	10	7	0	10	24
429	>tr|A0A0D9SDP0|A0A0D9SDP0_CHLSB Uncharacterized protein OS=Chlorocebus sabaeus PE=4 SV=1	NaN	10	10	0	10	20
430	>tr|A0A0D9R1C9|A0A0D9R1C9_CHLSB Uncharacterized protein OS=Chlorocebus sabaeus GN=MVP PE=4 SV=1	NaN	9	10	0	10	19
431	>tr|A0A0D9SCH4|A0A0D9SCH4_CHLSB Uncharacterized protein OS=Chlorocebus sabaeus GN=CALML5 PE=4 SV=1	10	NaN	9	0	10	19
432	>tr|A0A0D9RTV5|A0A0D9RTV5_CHLSB Uncharacterized protein OS=Chlorocebus sabaeus GN=DHX30 PE=4 SV=1	5	NaN	10	0	10	15
433	>tr|A0A0D9R2K7|A0A0D9R2K7_CHLSB Uncharacterized protein OS=Chlorocebus sabaeus GN=TNRC6A PE=4 SV=1	NaN	NaN	10	0	10	10
434	>tr|A0A0D9R719|A0A0D9R719_CHLSB Uncharacterized protein OS=Chlorocebus sabaeus GN=FLII PE=4 SV=1	NaN	NaN	10	0	10	10
435	>tr|A0A0D9R8Q2|A0A0D9R8Q2_CHLSB Uncharacterized protein OS=Chlorocebus sabaeus GN=HADHA PE=3 SV=1	NaN	NaN	10	0	10	10
436	>tr|A0A0D9RHV9|A0A0D9RHV9_CHLSB Uncharacterized protein OS=Chlorocebus sabaeus GN=YWHAZ PE=3 SV=1	NaN	NaN	10	0	10	10
437	>tr|A0A0D9RK37|A0A0D9RK37_CHLSB Uncharacterized protein OS=Chlorocebus sabaeus GN=SSFA2 PE=4 SV=1	NaN	NaN	10	0	10	10
438	>tr|A0A0D9RNM2|A0A0D9RNM2_CHLSB Uncharacterized protein OS=Chlorocebus sabaeus GN=YWHAE PE=3 SV=1	10	NaN	NaN	0	10	10
439	>tr|A0A0D9RSP2|A0A0D9RSP2_CHLSB Protein-tyrosine-phosphatase OS=Chlorocebus sabaeus GN=PTPN14 PE=4 SV=1	NaN	NaN	10	0	10	10
440	>tr|A0A0D9RTU5|A0A0D9RTU5_CHLSB Uncharacterized protein OS=Chlorocebus sabaeus GN=MYH7 PE=4 SV=1	10	NaN	NaN	0	10	10
441	>tr|A0A0D9RUB7|A0A0D9RUB7_CHLSB Uncharacterized protein OS=Chlorocebus sabaeus GN=CCT6A PE=3 SV=1	NaN	NaN	10	0	10	10
442	>tr|A0A0D9RWS6|A0A0D9RWS6_CHLSB Uncharacterized protein OS=Chlorocebus sabaeus GN=RANBP2 PE=4 SV=1	NaN	NaN	10	0	10	10
443	>tr|A0A0D9RXZ5|A0A0D9RXZ5_CHLSB Uncharacterized protein OS=Chlorocebus sabaeus GN=MYO6 PE=4 SV=1	NaN	NaN	10	0	10	10
444	>tr|A0A0D9RZX0|A0A0D9RZX0_CHLSB Uncharacterized protein OS=Chlorocebus sabaeus GN=MDH2 PE=3 SV=1	10	NaN	NaN	0	10	10
445	>tr|A0A0D9S3F8|A0A0D9S3F8_CHLSB Proteasome subunit beta type OS=Chlorocebus sabaeus GN=PSMB3 PE=3 SV=1	NaN	NaN	10	0	10	10
446	>tr|A0A0D9S485|A0A0D9S485_CHLSB Uncharacterized protein OS=Chlorocebus sabaeus GN=VRK3 PE=4 SV=1	NaN	NaN	10	0	10	10
447	>tr|A0A0D9S818|A0A0D9S818_CHLSB Uncharacterized protein OS=Chlorocebus sabaeus GN=RPA2 PE=4 SV=1	NaN	NaN	10	0	10	10
448	>tr|A0A0D9S9F8|A0A0D9S9F8_CHLSB Uncharacterized protein OS=Chlorocebus sabaeus PE=4 SV=1	10	NaN	NaN	0	10	10
449	>tr|A0A0D9S5Q5|A0A0D9S5Q5_CHLSB Uncharacterized protein OS=Chlorocebus sabaeus GN=FLG2 PE=4 SV=1	9	9	7	0	9	25
450	>tr|A0A0D9S0V3|A0A0D9S0V3_CHLSB Uncharacterized protein OS=Chlorocebus sabaeus GN=GRN PE=4 SV=1	9	NaN	8	0	9	17
451	>tr|A0A0D9R016|A0A0D9R016_CHLSB Uncharacterized protein OS=Chlorocebus sabaeus GN=KRT2 PE=3 SV=1	NaN	9	6	0	9	15
452	>tr|A0A0D9S3H8|A0A0D9S3H8_CHLSB Uncharacterized protein OS=Chlorocebus sabaeus GN=HNRNPAB PE=4 SV=1	NaN	4	9	0	9	13
453	>tr|A0A0D9QX38|A0A0D9QX38_CHLSB Uncharacterized protein OS=Chlorocebus sabaeus GN=SHROOM3 PE=4 SV=1	NaN	NaN	9	0	9	9
454	>tr|A0A0D9R7S5|A0A0D9R7S5_CHLSB Uncharacterized protein OS=Chlorocebus sabaeus GN=C7orf55-LUC7L2 PE=4 SV=1	NaN	NaN	9	0	9	9
455	>tr|A0A0D9R7S9|A0A0D9R7S9_CHLSB Uncharacterized protein OS=Chlorocebus sabaeus GN=SREBF1 PE=4 SV=1	9	NaN	NaN	0	9	9
456	>tr|A0A0D9R7W9|A0A0D9R7W9_CHLSB Uncharacterized protein OS=Chlorocebus sabaeus GN=TJP2 PE=4 SV=1	NaN	NaN	9	0	9	9
457	>tr|A0A0D9R8N3|A0A0D9R8N3_CHLSB Uncharacterized protein OS=Chlorocebus sabaeus GN=RCAN1 PE=4 SV=1	NaN	NaN	9	0	9	9
458	>tr|A0A0D9RB59|A0A0D9RB59_CHLSB Dual specificity protein phosphatase OS=Chlorocebus sabaeus GN=DUSP1 PE=3 SV=1	NaN	NaN	9	0	9	9
459	>tr|A0A0D9RBW5|A0A0D9RBW5_CHLSB Uncharacterized protein OS=Chlorocebus sabaeus GN=RPL36AL PE=3 SV=1	NaN	NaN	9	0	9	9
460	>tr|A0A0D9RDA8|A0A0D9RDA8_CHLSB Uncharacterized protein OS=Chlorocebus sabaeus GN=SRRM2 PE=4 SV=1	9	NaN	NaN	0	9	9
461	>tr|A0A0D9REH0|A0A0D9REH0_CHLSB Tyrosine-protein kinase receptor OS=Chlorocebus sabaeus GN=ALK PE=3 SV=1	NaN	9	NaN	0	9	9
462	>tr|A0A0D9RLR1|A0A0D9RLR1_CHLSB Core histone macro-H2A OS=Chlorocebus sabaeus GN=H2AFY PE=4 SV=1	NaN	NaN	9	0	9	9
463	>tr|A0A0D9RML4|A0A0D9RML4_CHLSB Uncharacterized protein OS=Chlorocebus sabaeus GN=PSMD2 PE=4 SV=1	NaN	NaN	9	0	9	9
464	>tr|A0A0D9RNI1|A0A0D9RNI1_CHLSB Uncharacterized protein OS=Chlorocebus sabaeus GN=TRA2B PE=4 SV=1	NaN	NaN	9	0	9	9
465	>tr|A0A0D9RPD2|A0A0D9RPD2_CHLSB DNA polymerase OS=Chlorocebus sabaeus GN=POLA1 PE=3 SV=1	NaN	NaN	9	0	9	9
466	>tr|A0A0D9RSS8|A0A0D9RSS8_CHLSB Uncharacterized protein OS=Chlorocebus sabaeus GN=BAZ1A PE=4 SV=1	NaN	NaN	9	0	9	9
467	>tr|A0A0D9RZI5|A0A0D9RZI5_CHLSB Uncharacterized protein OS=Chlorocebus sabaeus GN=PARP4 PE=4 SV=1	NaN	NaN	9	0	9	9
468	>tr|A0A0D9S8B7|A0A0D9S8B7_CHLSB Uncharacterized protein OS=Chlorocebus sabaeus GN=EIF4G3 PE=4 SV=1	NaN	NaN	9	0	9	9
469	>tr|A0A0D9S8E4|A0A0D9S8E4_CHLSB Uncharacterized protein OS=Chlorocebus sabaeus GN=UBR4 PE=4 SV=1	NaN	NaN	9	0	9	9
470	>tr|A0A0D9SAC9|A0A0D9SAC9_CHLSB Uncharacterized protein OS=Chlorocebus sabaeus GN=RPS28 PE=4 SV=1	NaN	NaN	9	0	9	9
471	>tr|A0A0D9RDZ6|A0A0D9RDZ6_CHLSB Uncharacterized protein OS=Chlorocebus sabaeus PE=3 SV=1	8	4	6	0	8	18
472	>tr|A0A0D9SBM5|A0A0D9SBM5_CHLSB Uncharacterized protein OS=Chlorocebus sabaeus GN=SNRPE PE=4 SV=1	4	6	8	0	8	18
473	>tr|A0A0D9SCE0|A0A0D9SCE0_CHLSB Uncharacterized protein OS=Chlorocebus sabaeus GN=RPL21 PE=4 SV=1	4	6	8	0	8	18
474	>tr|A0A0D9RVA9|A0A0D9RVA9_CHLSB Uncharacterized protein OS=Chlorocebus sabaeus PE=4 SV=1	8	4	5	0	8	17
475	>tr|A0A0D9RXA3|A0A0D9RXA3_CHLSB Uncharacterized protein OS=Chlorocebus sabaeus PE=4 SV=1	7	8	NaN	0	8	15
476	>tr|A0A0D9S8G1|A0A0D9S8G1_CHLSB Uncharacterized protein (Fragment) OS=Chlorocebus sabaeus GN=CROCC PE=4 SV=1	NaN	7	8	0	8	15
477	>tr|A0A0D9R0I1|A0A0D9R0I1_CHLSB Uncharacterized protein OS=Chlorocebus sabaeus GN=PHF5A PE=4 SV=1	NaN	8	6	0	8	14
478	>tr|A0A0D9RC62|A0A0D9RC62_CHLSB Uncharacterized protein OS=Chlorocebus sabaeus GN=SOGA1 PE=4 SV=1	8	NaN	6	0	8	14
479	>tr|A0A0D9RIL8|A0A0D9RIL8_CHLSB Uncharacterized protein OS=Chlorocebus sabaeus GN=ARF4 PE=4 SV=1	3	8	3	0	8	14
480	>tr|A0A0D9S3P5|A0A0D9S3P5_CHLSB Coatomer subunit alpha OS=Chlorocebus sabaeus GN=COPA PE=4 SV=1	NaN	6	8	0	8	14
481	>tr|A0A0D9R6B0|A0A0D9R6B0_CHLSB Uncharacterized protein (Fragment) OS=Chlorocebus sabaeus PE=3 SV=1	4	8	NaN	0	8	12
482	>tr|A0A0D9SAE0|A0A0D9SAE0_CHLSB Uncharacterized protein (Fragment) OS=Chlorocebus sabaeus GN=ATP5J2 PE=4 SV=1	2	2	8	0	8	12
483	>tr|A0A0D9SDT2|A0A0D9SDT2_CHLSB Uncharacterized protein OS=Chlorocebus sabaeus GN=ATP5O PE=3 SV=1	NaN	4	8	0	8	12
484	>tr|A0A0D9R1W7|A0A0D9R1W7_CHLSB Elongation factor Tu OS=Chlorocebus sabaeus GN=TUFM PE=3 SV=1	NaN	8	3	0	8	11
485	>tr|A0A0D9RNA2|A0A0D9RNA2_CHLSB Uncharacterized protein OS=Chlorocebus sabaeus GN=DDX3X PE=3 SV=1	1	1	8	0	8	10
486	>tr|A0A0D9QVP1|A0A0D9QVP1_CHLSB Uncharacterized protein OS=Chlorocebus sabaeus GN=PSMD8 PE=4 SV=1	NaN	NaN	8	0	8	8
487	>tr|A0A0D9QZ85|A0A0D9QZ85_CHLSB Uncharacterized protein OS=Chlorocebus sabaeus GN=GDF15 PE=3 SV=1	NaN	NaN	8	0	8	8
488	>tr|A0A0D9R0Y0|A0A0D9R0Y0_CHLSB Uncharacterized protein OS=Chlorocebus sabaeus GN=LARP4 PE=4 SV=1	NaN	NaN	8	0	8	8
489	>tr|A0A0D9R8H0|A0A0D9R8H0_CHLSB Uncharacterized protein OS=Chlorocebus sabaeus GN=KIAA1549 PE=4 SV=1	NaN	NaN	8	0	8	8
490	>tr|A0A0D9RBA7|A0A0D9RBA7_CHLSB Uncharacterized protein OS=Chlorocebus sabaeus GN=ITPR3 PE=4 SV=1	NaN	NaN	8	0	8	8
491	>tr|A0A0D9RDT3|A0A0D9RDT3_CHLSB Condensin complex subunit 1 OS=Chlorocebus sabaeus GN=NCAPD2 PE=3 SV=1	NaN	NaN	8	0	8	8
492	>tr|A0A0D9RDU4|A0A0D9RDU4_CHLSB Uncharacterized protein OS=Chlorocebus sabaeus GN=DNAJC13 PE=4 SV=1	NaN	NaN	8	0	8	8
493	>tr|A0A0D9RGD6|A0A0D9RGD6_CHLSB Uncharacterized protein OS=Chlorocebus sabaeus GN=CP PE=4 SV=1	8	NaN	NaN	0	8	8
494	>tr|A0A0D9RHD6|A0A0D9RHD6_CHLSB Proteasome subunit beta type OS=Chlorocebus sabaeus GN=PSMB1 PE=3 SV=1	NaN	NaN	8	0	8	8
495	>tr|A0A0D9RHV5|A0A0D9RHV5_CHLSB Uncharacterized protein OS=Chlorocebus sabaeus GN=SLTM PE=4 SV=1	NaN	8	NaN	0	8	8
496	>tr|A0A0D9RS82|A0A0D9RS82_CHLSB Uncharacterized protein OS=Chlorocebus sabaeus GN=CCT7 PE=3 SV=1	NaN	NaN	8	0	8	8
497	>tr|A0A0D9RSM7|A0A0D9RSM7_CHLSB Proteasome subunit alpha type OS=Chlorocebus sabaeus GN=PSMA6 PE=3 SV=1	NaN	NaN	8	0	8	8
498	>tr|A0A0D9S2M1|A0A0D9S2M1_CHLSB Uncharacterized protein (Fragment) OS=Chlorocebus sabaeus GN=RDX PE=4 SV=1	NaN	NaN	8	0	8	8
499	>tr|A0A0D9S520|A0A0D9S520_CHLSB Uncharacterized protein (Fragment) OS=Chlorocebus sabaeus GN=ARL6IP4 PE=4 SV=1	8	NaN	NaN	0	8	8
500	>tr|A0A0D9SDY5|A0A0D9SDY5_CHLSB Uncharacterized protein OS=Chlorocebus sabaeus GN=RPL22 PE=4 SV=1	NaN	NaN	8	0	8	8
501	>tr|A0A0D9R0I0|A0A0D9R0I0_CHLSB Uncharacterized protein OS=Chlorocebus sabaeus GN=KRT80 PE=4 SV=1	5	7	7	0	7	19
502	>tr|A0A0D9QZZ9|A0A0D9QZZ9_CHLSB Ribosomal protein L34 OS=Chlorocebus sabaeus GN=MRPL34 PE=3 SV=1	7	6	5	0	7	18
503	>tr|A0A0D9S890|A0A0D9S890_CHLSB Uncharacterized protein OS=Chlorocebus sabaeus PE=3 SV=1	6	5	7	0	7	18
504	>tr|A0A0D9S2G7|A0A0D9S2G7_CHLSB Uncharacterized protein OS=Chlorocebus sabaeus PE=3 SV=1	2	5	7	0	7	14
505	>tr|A0A0D9QYU5|A0A0D9QYU5_CHLSB Uncharacterized protein OS=Chlorocebus sabaeus GN=MYL6B PE=4 SV=1	NaN	6	7	0	7	13
506	>tr|A0A0D9RVD1|A0A0D9RVD1_CHLSB Uncharacterized protein OS=Chlorocebus sabaeus PE=4 SV=1	NaN	7	6	0	7	13
507	>tr|A0A0D9S6Y9|A0A0D9S6Y9_CHLSB Uncharacterized protein OS=Chlorocebus sabaeus GN=ACADM PE=3 SV=1	4	7	2	0	7	13
508	>tr|A0A0D9R9S6|A0A0D9R9S6_CHLSB Uncharacterized protein OS=Chlorocebus sabaeus GN=TMEM169 PE=4 SV=1	4	7	1	0	7	12
509	>tr|A0A0D9RT40|A0A0D9RT40_CHLSB Histone H2A OS=Chlorocebus sabaeus GN=H2AFV PE=3 SV=1	5	NaN	7	0	7	12
510	>tr|A0A0D9S2X8|A0A0D9S2X8_CHLSB Uncharacterized protein OS=Chlorocebus sabaeus GN=KRT27 PE=4 SV=1	5	7	NaN	0	7	12
511	>tr|A0A0D9QWR4|A0A0D9QWR4_CHLSB Uncharacterized protein OS=Chlorocebus sabaeus GN=HNRNPD PE=4 SV=1	NaN	3	7	0	7	10
512	>tr|A0A0D9S488|A0A0D9S488_CHLSB Uncharacterized protein OS=Chlorocebus sabaeus GN=LGALS3BP PE=4 SV=1	NaN	7	3	0	7	10
513	>tr|A0A0D9RAI5|A0A0D9RAI5_CHLSB Uncharacterized protein OS=Chlorocebus sabaeus GN=NOP16 PE=4 SV=1	NaN	7	2	0	7	9
514	>tr|A0A0D9RCP4|A0A0D9RCP4_CHLSB Uncharacterized protein OS=Chlorocebus sabaeus GN=PHB2 PE=4 SV=1	2	NaN	7	0	7	9
515	>tr|A0A0D9RNF7|A0A0D9RNF7_CHLSB Uncharacterized protein OS=Chlorocebus sabaeus GN=CSRP1 PE=4 SV=1	NaN	2	7	0	7	9
516	>tr|A0A0D9R260|A0A0D9R260_CHLSB Small nuclear ribonucleoprotein-associated protein OS=Chlorocebus sabaeus GN=SNRPN PE=3 SV=1	7	NaN	1	0	7	8
517	>tr|A0A0D9S3E8|A0A0D9S3E8_CHLSB Uncharacterized protein OS=Chlorocebus sabaeus PE=3 SV=1	NaN	1	7	0	7	8
518	>sp|Q2IBA7|CAZA2_CHLAE F-actin-capping protein subunit alpha-2 OS=Chlorocebus aethiops GN=CAPZA2 PE=3 SV=3	NaN	NaN	7	0	7	7
519	>tr|A0A0D9QW25|A0A0D9QW25_CHLSB Uncharacterized protein OS=Chlorocebus sabaeus GN=CCT2 PE=3 SV=1	7	NaN	NaN	0	7	7
520	>tr|A0A0D9QXQ3|A0A0D9QXQ3_CHLSB Uncharacterized protein OS=Chlorocebus sabaeus GN=ANKRD17 PE=4 SV=1	NaN	NaN	7	0	7	7
521	>tr|A0A0D9QYM4|A0A0D9QYM4_CHLSB Uncharacterized protein OS=Chlorocebus sabaeus GN=HNRNPA2B1 PE=4 SV=1	NaN	7	NaN	0	7	7
522	>tr|A0A0D9QZN6|A0A0D9QZN6_CHLSB Uncharacterized protein OS=Chlorocebus sabaeus GN=DPCD PE=4 SV=1	NaN	NaN	7	0	7	7
523	>tr|A0A0D9R013|A0A0D9R013_CHLSB Uncharacterized protein OS=Chlorocebus sabaeus GN=KRT1 PE=3 SV=1	NaN	7	NaN	0	7	7
524	>tr|A0A0D9R2D4|A0A0D9R2D4_CHLSB Uncharacterized protein OS=Chlorocebus sabaeus GN=SUN2 PE=4 SV=1	NaN	NaN	7	0	7	7
525	>tr|A0A0D9R2K9|A0A0D9R2K9_CHLSB Uncharacterized protein OS=Chlorocebus sabaeus GN=EEF1G PE=4 SV=1	NaN	NaN	7	0	7	7
526	>tr|A0A0D9R4R7|A0A0D9R4R7_CHLSB Uncharacterized protein OS=Chlorocebus sabaeus GN=SLC16A9 PE=4 SV=1	7	NaN	NaN	0	7	7
527	>tr|A0A0D9R5T1|A0A0D9R5T1_CHLSB Phosphoserine aminotransferase OS=Chlorocebus sabaeus GN=PSAT1 PE=3 SV=1	NaN	NaN	7	0	7	7
528	>tr|A0A0D9R827|A0A0D9R827_CHLSB Uncharacterized protein OS=Chlorocebus sabaeus GN=YWHAH PE=3 SV=1	7	NaN	NaN	0	7	7
529	>tr|A0A0D9RCW6|A0A0D9RCW6_CHLSB Uncharacterized protein OS=Chlorocebus sabaeus GN=KIAA1671 PE=4 SV=1	NaN	NaN	7	0	7	7
530	>tr|A0A0D9RGP2|A0A0D9RGP2_CHLSB Uncharacterized protein OS=Chlorocebus sabaeus GN=BIRC6 PE=4 SV=1	NaN	NaN	7	0	7	7
531	>tr|A0A0D9RI14|A0A0D9RI14_CHLSB Uncharacterized protein OS=Chlorocebus sabaeus PE=4 SV=1	NaN	7	NaN	0	7	7
532	>tr|A0A0D9RIF2|A0A0D9RIF2_CHLSB Uncharacterized protein OS=Chlorocebus sabaeus GN=MAGED2 PE=4 SV=1	NaN	NaN	7	0	7	7
533	>tr|A0A0D9RKR9|A0A0D9RKR9_CHLSB Proteasome subunit beta type OS=Chlorocebus sabaeus GN=PSMB6 PE=3 SV=1	NaN	7	NaN	0	7	7
534	>tr|A0A0D9RL03|A0A0D9RL03_CHLSB Uncharacterized protein OS=Chlorocebus sabaeus GN=RPA3 PE=4 SV=1	NaN	NaN	7	0	7	7
535	>tr|A0A0D9RLH2|A0A0D9RLH2_CHLSB Uncharacterized protein (Fragment) OS=Chlorocebus sabaeus GN=GSN PE=4 SV=1	NaN	7	NaN	0	7	7
536	>tr|A0A0D9RLU5|A0A0D9RLU5_CHLSB Uncharacterized protein OS=Chlorocebus sabaeus GN=SCAF8 PE=4 SV=1	NaN	NaN	7	0	7	7
537	>tr|A0A0D9RNU2|A0A0D9RNU2_CHLSB Protein phosphatase 1 regulatory subunit OS=Chlorocebus sabaeus GN=PPP1R12B PE=4 SV=1	NaN	NaN	7	0	7	7
538	>tr|A0A0D9RUA5|A0A0D9RUA5_CHLSB L-lactate dehydrogenase (Fragment) OS=Chlorocebus sabaeus PE=3 SV=1	NaN	NaN	7	0	7	7
539	>tr|A0A0D9RUQ5|A0A0D9RUQ5_CHLSB Uncharacterized protein (Fragment) OS=Chlorocebus sabaeus GN=IMMT PE=4 SV=1	NaN	7	NaN	0	7	7
540	>tr|A0A0D9SA63|A0A0D9SA63_CHLSB Uncharacterized protein OS=Chlorocebus sabaeus GN=RPL35 PE=3 SV=1	6	5	6	0	6	17
541	>tr|A0A0D9R2M0|A0A0D9R2M0_CHLSB Uncharacterized protein OS=Chlorocebus sabaeus GN=PRDX2 PE=4 SV=1	6	2	4	0	6	12
542	>tr|A0A0D9R3S5|A0A0D9R3S5_CHLSB Uncharacterized protein OS=Chlorocebus sabaeus GN=ILF3 PE=4 SV=1	NaN	6	5	0	6	11
543	>tr|A0A0D9S8T4|A0A0D9S8T4_CHLSB Uncharacterized protein (Fragment) OS=Chlorocebus sabaeus PE=4 SV=1	5	6	NaN	0	6	11
544	>tr|A0A0D9QXL3|A0A0D9QXL3_CHLSB Uncharacterized protein OS=Chlorocebus sabaeus GN=CFAP20 PE=4 SV=1	3	1	6	0	6	10
545	>tr|A0A0D9R3B0|A0A0D9R3B0_CHLSB Uncharacterized protein OS=Chlorocebus sabaeus GN=BLMH PE=4 SV=1	4	6	NaN	0	6	10
546	>tr|A0A0D9R8S0|A0A0D9R8S0_CHLSB Uncharacterized protein OS=Chlorocebus sabaeus GN=HADHB PE=3 SV=1	NaN	3	6	0	6	9
547	>tr|A0A0D9RFQ0|A0A0D9RFQ0_CHLSB Uncharacterized protein OS=Chlorocebus sabaeus PE=3 SV=1	NaN	3	6	0	6	9
548	>tr|A0A0D9RPC8|A0A0D9RPC8_CHLSB Uncharacterized protein OS=Chlorocebus sabaeus GN=DACT1 PE=4 SV=1	NaN	3	6	0	6	9
549	>sp|Q7YR26|TOP1_CHLAE DNA topoisomerase 1 OS=Chlorocebus aethiops GN=TOP1 PE=2 SV=1	NaN	NaN	6	0	6	6
550	>tr|A0A0D9QVY8|A0A0D9QVY8_CHLSB Protein-tyrosine-phosphatase OS=Chlorocebus sabaeus GN=PTPRB PE=4 SV=1	NaN	6	NaN	0	6	6
551	>tr|A0A0D9QWE5|A0A0D9QWE5_CHLSB Uncharacterized protein OS=Chlorocebus sabaeus GN=PTPN13 PE=4 SV=1	NaN	NaN	6	0	6	6
552	>tr|A0A0D9QXA6|A0A0D9QXA6_CHLSB Uncharacterized protein OS=Chlorocebus sabaeus GN=MICAL2 PE=4 SV=1	6	NaN	NaN	0	6	6
553	>tr|A0A0D9QYL1|A0A0D9QYL1_CHLSB DNA-directed RNA polymerase OS=Chlorocebus sabaeus GN=POLR2B PE=3 SV=1	NaN	NaN	6	0	6	6
554	>tr|A0A0D9R0L3|A0A0D9R0L3_CHLSB Uncharacterized protein OS=Chlorocebus sabaeus GN=NUP160 PE=4 SV=1	6	NaN	NaN	0	6	6
555	>tr|A0A0D9R1R5|A0A0D9R1R5_CHLSB AP complex subunit beta OS=Chlorocebus sabaeus GN=AP2B1 PE=3 SV=1	NaN	NaN	6	0	6	6
556	>tr|A0A0D9R1V0|A0A0D9R1V0_CHLSB Eukaryotic translation initiation factor 3 subunit C OS=Chlorocebus sabaeus GN=EIF3C PE=3 SV=1	NaN	NaN	6	0	6	6
557	>tr|A0A0D9R2K6|A0A0D9R2K6_CHLSB Uncharacterized protein OS=Chlorocebus sabaeus GN=CYFIP1 PE=4 SV=1	NaN	NaN	6	0	6	6
558	>tr|A0A0D9R344|A0A0D9R344_CHLSB Uncharacterized protein OS=Chlorocebus sabaeus GN=STX5 PE=4 SV=1	NaN	NaN	6	0	6	6
559	>tr|A0A0D9R514|A0A0D9R514_CHLSB Uncharacterized protein OS=Chlorocebus sabaeus GN=PCBP3 PE=4 SV=1	NaN	NaN	6	0	6	6
560	>tr|A0A0D9R5T4|A0A0D9R5T4_CHLSB Uncharacterized protein OS=Chlorocebus sabaeus GN=DCDC2 PE=4 SV=1	NaN	NaN	6	0	6	6
561	>tr|A0A0D9R8L5|A0A0D9R8L5_CHLSB Uncharacterized protein OS=Chlorocebus sabaeus GN=YBX3 PE=4 SV=1	NaN	NaN	6	0	6	6
562	>tr|A0A0D9REE8|A0A0D9REE8_CHLSB Uncharacterized protein OS=Chlorocebus sabaeus GN=GEMIN5 PE=4 SV=1	NaN	NaN	6	0	6	6
563	>tr|A0A0D9RFJ8|A0A0D9RFJ8_CHLSB Uncharacterized protein (Fragment) OS=Chlorocebus sabaeus GN=ERCC6L PE=4 SV=1	NaN	NaN	6	0	6	6
564	>tr|A0A0D9RFZ4|A0A0D9RFZ4_CHLSB Chloride anion exchanger OS=Chlorocebus sabaeus GN=SLC26A3 PE=3 SV=1	6	NaN	NaN	0	6	6
565	>tr|A0A0D9RIT2|A0A0D9RIT2_CHLSB Uncharacterized protein OS=Chlorocebus sabaeus GN=POLR2E PE=3 SV=1	NaN	NaN	6	0	6	6
566	>tr|A0A0D9RJC0|A0A0D9RJC0_CHLSB Uncharacterized protein OS=Chlorocebus sabaeus GN=TCP1 PE=3 SV=1	NaN	NaN	6	0	6	6
567	>tr|A0A0D9RLV0|A0A0D9RLV0_CHLSB Uncharacterized protein OS=Chlorocebus sabaeus GN=ZC2HC1A PE=4 SV=1	NaN	NaN	6	0	6	6
568	>tr|A0A0D9RMR7|A0A0D9RMR7_CHLSB Pyruvate kinase OS=Chlorocebus sabaeus PE=3 SV=1	NaN	NaN	6	0	6	6
569	>tr|A0A0D9RNH2|A0A0D9RNH2_CHLSB Uncharacterized protein OS=Chlorocebus sabaeus GN=SRSF6 PE=4 SV=1	6	NaN	NaN	0	6	6
570	>tr|A0A0D9RSM6|A0A0D9RSM6_CHLSB Uncharacterized protein OS=Chlorocebus sabaeus GN=RAB11FIP1 PE=4 SV=1	NaN	NaN	6	0	6	6
571	>tr|A0A0D9RT77|A0A0D9RT77_CHLSB Proteasome subunit alpha type OS=Chlorocebus sabaeus GN=PSMA7 PE=3 SV=1	NaN	NaN	6	0	6	6
572	>tr|A0A0D9RV19|A0A0D9RV19_CHLSB Uncharacterized protein OS=Chlorocebus sabaeus GN=PDLIM2 PE=4 SV=1	NaN	NaN	6	0	6	6
573	>tr|A0A0D9RWB7|A0A0D9RWB7_CHLSB Uncharacterized protein OS=Chlorocebus sabaeus GN=BCLAF1 PE=4 SV=1	NaN	NaN	6	0	6	6
574	>tr|A0A0D9RYK4|A0A0D9RYK4_CHLSB Uncharacterized protein OS=Chlorocebus sabaeus GN=CKAP2 PE=4 SV=1	NaN	NaN	6	0	6	6
575	>tr|A0A0D9S2I7|A0A0D9S2I7_CHLSB Uncharacterized protein OS=Chlorocebus sabaeus GN=CKAP4 PE=4 SV=1	NaN	NaN	6	0	6	6
576	>tr|A0A0D9S3X4|A0A0D9S3X4_CHLSB Uncharacterized protein OS=Chlorocebus sabaeus GN=SCAF1 PE=4 SV=1	NaN	NaN	6	0	6	6
577	>tr|A0A0D9S5G4|A0A0D9S5G4_CHLSB Uncharacterized protein OS=Chlorocebus sabaeus GN=UBAP2L PE=4 SV=1	NaN	NaN	6	0	6	6
578	>tr|A0A0D9S6J3|A0A0D9S6J3_CHLSB Proteasome subunit alpha type OS=Chlorocebus sabaeus GN=PSMA5 PE=3 SV=1	NaN	NaN	6	0	6	6
579	>tr|A0A0D9S7T7|A0A0D9S7T7_CHLSB Proteasome subunit beta type OS=Chlorocebus sabaeus GN=PSMB2 PE=3 SV=1	NaN	NaN	6	0	6	6
580	>tr|A0A0D9S7Z5|A0A0D9S7Z5_CHLSB Uncharacterized protein OS=Chlorocebus sabaeus GN=PUM1 PE=4 SV=1	NaN	NaN	6	0	6	6
581	>tr|A0A0D9S8Q6|A0A0D9S8Q6_CHLSB Uncharacterized protein (Fragment) OS=Chlorocebus sabaeus PE=3 SV=1	6	NaN	NaN	0	6	6
582	>tr|A0A0D9SAW5|A0A0D9SAW5_CHLSB 40S ribosomal protein S12 OS=Chlorocebus sabaeus GN=RPS12 PE=3 SV=1	NaN	NaN	6	0	6	6
583	>tr|A0A0D9SB91|A0A0D9SB91_CHLSB Uncharacterized protein OS=Chlorocebus sabaeus GN=CSNK1A1L PE=4 SV=1	NaN	NaN	6	0	6	6
584	>tr|A0A0D9SDH4|A0A0D9SDH4_CHLSB 60S ribosomal protein L6 OS=Chlorocebus sabaeus PE=3 SV=1	NaN	NaN	6	0	6	6
585	>tr|A0A0D9RIM7|A0A0D9RIM7_CHLSB Uncharacterized protein OS=Chlorocebus sabaeus GN=SRSF7 PE=4 SV=1	5	5	4	0	5	14
586	>tr|A0A0D9RC11|A0A0D9RC11_CHLSB Uncharacterized protein OS=Chlorocebus sabaeus GN=TRAP1 PE=3 SV=1	5	NaN	5	0	5	10
587	>tr|A0A0D9RKN2|A0A0D9RKN2_CHLSB Uncharacterized protein OS=Chlorocebus sabaeus GN=SLC25A13 PE=3 SV=1	NaN	5	5	0	5	10
588	>tr|A0A0D9RAH6|A0A0D9RAH6_CHLSB Uncharacterized protein OS=Chlorocebus sabaeus GN=CTTN PE=4 SV=1	NaN	4	5	0	5	9
589	>tr|A0A0D9S2F4|A0A0D9S2F4_CHLSB Uncharacterized protein OS=Chlorocebus sabaeus GN=KRT9 PE=3 SV=1	5	NaN	3	0	5	8
590	>tr|A0A0D9S958|A0A0D9S958_CHLSB Uncharacterized protein OS=Chlorocebus sabaeus GN=RPL37A PE=3 SV=1	2	1	5	0	5	8
591	>tr|A0A0D9RLZ2|A0A0D9RLZ2_CHLSB Uncharacterized protein OS=Chlorocebus sabaeus GN=ITIH2 PE=4 SV=1	2	5	NaN	0	5	7
592	>tr|A0A0D9QVN1|A0A0D9QVN1_CHLSB Uncharacterized protein OS=Chlorocebus sabaeus PE=4 SV=1	5	NaN	NaN	0	5	5
593	>tr|A0A0D9QVP3|A0A0D9QVP3_CHLSB Uncharacterized protein OS=Chlorocebus sabaeus GN=ARHGEF17 PE=4 SV=1	NaN	NaN	5	0	5	5
594	>tr|A0A0D9QVP9|A0A0D9QVP9_CHLSB Uncharacterized protein OS=Chlorocebus sabaeus GN=FCHSD2 PE=4 SV=1	5	NaN	NaN	0	5	5
595	>tr|A0A0D9QW15|A0A0D9QW15_CHLSB Importin subunit alpha OS=Chlorocebus sabaeus GN=KPNA2 PE=3 SV=1	NaN	NaN	5	0	5	5
596	>tr|A0A0D9QX32|A0A0D9QX32_CHLSB Uncharacterized protein OS=Chlorocebus sabaeus GN=EIF4G2 PE=4 SV=1	NaN	NaN	5	0	5	5
597	>tr|A0A0D9R002|A0A0D9R002_CHLSB Uncharacterized protein OS=Chlorocebus sabaeus GN=MSI2 PE=4 SV=1	NaN	NaN	5	0	5	5
598	>tr|A0A0D9R4W4|A0A0D9R4W4_CHLSB Eukaryotic translation initiation factor 3 subunit G OS=Chlorocebus sabaeus GN=EIF3G PE=3 SV=1	NaN	NaN	5	0	5	5
599	>tr|A0A0D9R6G5|A0A0D9R6G5_CHLSB L-lactate dehydrogenase OS=Chlorocebus sabaeus GN=LDHB PE=3 SV=1	NaN	NaN	5	0	5	5
600	>tr|A0A0D9R7Q1|A0A0D9R7Q1_CHLSB Uncharacterized protein OS=Chlorocebus sabaeus GN=CANX PE=3 SV=1	NaN	5	NaN	0	5	5
601	>tr|A0A0D9R8T2|A0A0D9R8T2_CHLSB Uncharacterized protein OS=Chlorocebus sabaeus GN=SHARPIN PE=4 SV=1	NaN	5	NaN	0	5	5
602	>tr|A0A0D9RAG1|A0A0D9RAG1_CHLSB Uncharacterized protein OS=Chlorocebus sabaeus GN=CEP170 PE=4 SV=1	NaN	NaN	5	0	5	5
603	>tr|A0A0D9RFT6|A0A0D9RFT6_CHLSB Structural maintenance of chromosomes protein OS=Chlorocebus sabaeus GN=SMC2 PE=3 SV=1	NaN	NaN	5	0	5	5
604	>tr|A0A0D9RFW2|A0A0D9RFW2_CHLSB Uncharacterized protein OS=Chlorocebus sabaeus GN=LAMB1 PE=4 SV=1	NaN	NaN	5	0	5	5
605	>tr|A0A0D9RG02|A0A0D9RG02_CHLSB Uncharacterized protein OS=Chlorocebus sabaeus GN=TMOD3 PE=4 SV=1	NaN	NaN	5	0	5	5
606	>tr|A0A0D9RG93|A0A0D9RG93_CHLSB Uncharacterized protein (Fragment) OS=Chlorocebus sabaeus GN=HSPD1 PE=3 SV=1	NaN	NaN	5	0	5	5
607	>tr|A0A0D9RIN4|A0A0D9RIN4_CHLSB Uncharacterized protein OS=Chlorocebus sabaeus GN=LARS PE=3 SV=1	NaN	NaN	5	0	5	5
608	>tr|A0A0D9RIP3|A0A0D9RIP3_CHLSB Uncharacterized protein OS=Chlorocebus sabaeus GN=YLPM1 PE=4 SV=1	NaN	NaN	5	0	5	5
609	>tr|A0A0D9RJE2|A0A0D9RJE2_CHLSB Uncharacterized protein OS=Chlorocebus sabaeus GN=HSD17B10 PE=3 SV=1	NaN	5	NaN	0	5	5
610	>tr|A0A0D9RKC1|A0A0D9RKC1_CHLSB Uncharacterized protein OS=Chlorocebus sabaeus GN=DECR1 PE=4 SV=1	NaN	NaN	5	0	5	5
611	>tr|A0A0D9RLE7|A0A0D9RLE7_CHLSB Uncharacterized protein OS=Chlorocebus sabaeus GN=NDUFA4 PE=4 SV=1	NaN	NaN	5	0	5	5
612	>tr|A0A0D9RLU6|A0A0D9RLU6_CHLSB Uncharacterized protein OS=Chlorocebus sabaeus GN=BAG2 PE=4 SV=1	NaN	NaN	5	0	5	5
613	>tr|A0A0D9RMP0|A0A0D9RMP0_CHLSB Uncharacterized protein OS=Chlorocebus sabaeus PE=3 SV=1	NaN	5	NaN	0	5	5
614	>tr|A0A0D9RPJ9|A0A0D9RPJ9_CHLSB Uncharacterized protein OS=Chlorocebus sabaeus GN=PRDX4 PE=4 SV=1	5	NaN	NaN	0	5	5
615	>tr|A0A0D9RQ73|A0A0D9RQ73_CHLSB T-complex protein 1 subunit delta OS=Chlorocebus sabaeus GN=CCT4 PE=3 SV=1	NaN	NaN	5	0	5	5
616	>tr|A0A0D9RR92|A0A0D9RR92_CHLSB Uncharacterized protein OS=Chlorocebus sabaeus GN=VDAC3 PE=4 SV=1	NaN	NaN	5	0	5	5
617	>tr|A0A0D9RSI9|A0A0D9RSI9_CHLSB Uncharacterized protein OS=Chlorocebus sabaeus GN=ARHGEF28 PE=4 SV=1	NaN	NaN	5	0	5	5
618	>tr|A0A0D9RTY2|A0A0D9RTY2_CHLSB Uncharacterized protein OS=Chlorocebus sabaeus GN=PRPF40A PE=4 SV=1	5	NaN	NaN	0	5	5
619	>tr|A0A0D9RUD9|A0A0D9RUD9_CHLSB Uncharacterized protein OS=Chlorocebus sabaeus GN=TP53BP2 PE=4 SV=1	NaN	NaN	5	0	5	5
620	>tr|A0A0D9RXC2|A0A0D9RXC2_CHLSB Uncharacterized protein OS=Chlorocebus sabaeus GN=AKAP13 PE=4 SV=1	NaN	NaN	5	0	5	5
621	>tr|A0A0D9RXY3|A0A0D9RXY3_CHLSB Uncharacterized protein OS=Chlorocebus sabaeus GN=CCDC127 PE=4 SV=1	NaN	NaN	5	0	5	5
622	>tr|A0A0D9RZH6|A0A0D9RZH6_CHLSB Uncharacterized protein (Fragment) OS=Chlorocebus sabaeus GN=KATNAL2 PE=3 SV=1	5	NaN	NaN	0	5	5
623	>tr|A0A0D9RZS5|A0A0D9RZS5_CHLSB Uncharacterized protein (Fragment) OS=Chlorocebus sabaeus GN=PSPC1 PE=4 SV=1	NaN	NaN	5	0	5	5
624	>tr|A0A0D9RZY9|A0A0D9RZY9_CHLSB Uncharacterized protein OS=Chlorocebus sabaeus GN=MALT1 PE=4 SV=1	NaN	NaN	5	0	5	5
625	>tr|A0A0D9S0C3|A0A0D9S0C3_CHLSB Alpha-1-4 glucan phosphorylase OS=Chlorocebus sabaeus GN=PYGB PE=3 SV=1	5	NaN	NaN	0	5	5
626	>tr|A0A0D9S2G2|A0A0D9S2G2_CHLSB Uncharacterized protein OS=Chlorocebus sabaeus GN=KRT19 PE=3 SV=1	5	NaN	NaN	0	5	5
627	>tr|A0A0D9S2Z3|A0A0D9S2Z3_CHLSB Uncharacterized protein OS=Chlorocebus sabaeus GN=KRT24 PE=4 SV=1	NaN	NaN	5	0	5	5
628	>tr|A0A0D9S405|A0A0D9S405_CHLSB Uncharacterized protein OS=Chlorocebus sabaeus GN=PHB PE=4 SV=1	NaN	NaN	5	0	5	5
629	>tr|A0A0D9S5P4|A0A0D9S5P4_CHLSB Protein S100 OS=Chlorocebus sabaeus GN=S100A8 PE=3 SV=1	5	NaN	NaN	0	5	5
630	>tr|A0A0D9S5T8|A0A0D9S5T8_CHLSB Proteasome subunit beta type OS=Chlorocebus sabaeus GN=PSMB4 PE=3 SV=1	NaN	NaN	5	0	5	5
631	>tr|A0A0D9S711|A0A0D9S711_CHLSB Guanine nucleotide-binding protein subunit gamma OS=Chlorocebus sabaeus GN=GNG12 PE=3 SV=1	NaN	NaN	5	0	5	5
632	>tr|A0A0D9SB63|A0A0D9SB63_CHLSB Uncharacterized protein OS=Chlorocebus sabaeus PE=4 SV=1	NaN	NaN	5	0	5	5
633	>tr|B0LB09|B0LB09_CHLAE CCCH-type zinc finger antiviral protein OS=Chlorocebus aethiops GN=Zc3hav1 PE=2 SV=1	NaN	NaN	5	0	5	5
634	>tr|A0A0D9QZY9|A0A0D9QZY9_CHLSB Uncharacterized protein OS=Chlorocebus sabaeus GN=KRT76 PE=3 SV=1	4	4	4	0	4	12
635	>tr|A0A0D9RME4|A0A0D9RME4_CHLSB Protein kinase C OS=Chlorocebus sabaeus GN=ARAF PE=4 SV=1	4	4	NaN	0	4	8
636	>NSP6 (RRV-12- 92aa):	NaN	4	3	0	4	7
637	>tr|A0A0D9QW47|A0A0D9QW47_CHLSB Uncharacterized protein OS=Chlorocebus sabaeus GN=CPSF6 PE=4 SV=1	4	NaN	3	0	4	7
638	>tr|A0A0D9RD74|A0A0D9RD74_CHLSB Uncharacterized protein OS=Chlorocebus sabaeus PE=4 SV=1	NaN	4	3	0	4	7
639	>tr|A0A0D9RYD7|A0A0D9RYD7_CHLSB Uncharacterized protein OS=Chlorocebus sabaeus GN=MYL12B PE=4 SV=1	NaN	4	3	0	4	7
640	>tr|A0A0D9S7Q4|A0A0D9S7Q4_CHLSB Uncharacterized protein OS=Chlorocebus sabaeus GN=SF3A3 PE=4 SV=1	3	4	NaN	0	4	7
641	>tr|A0A0D9R1G1|A0A0D9R1G1_CHLSB Uncharacterized protein OS=Chlorocebus sabaeus GN=TUBA1A PE=3 SV=1	4	NaN	2	0	4	6
642	>tr|A0A0D9R878|A0A0D9R878_CHLSB Uncharacterized protein OS=Chlorocebus sabaeus GN=TBC1D10C PE=4 SV=1	4	2	NaN	0	4	6
643	>tr|A0A0D9RUT2|A0A0D9RUT2_CHLSB Uncharacterized protein OS=Chlorocebus sabaeus GN=DARS PE=3 SV=1	NaN	2	4	0	4	6
644	>tr|A0A0D9S2G3|A0A0D9S2G3_CHLSB Uncharacterized protein OS=Chlorocebus sabaeus GN=KRT15 PE=3 SV=1	2	NaN	4	0	4	6
645	>tr|A0A0D9SDH3|A0A0D9SDH3_CHLSB Uncharacterized protein OS=Chlorocebus sabaeus GN=RPL10L PE=4 SV=1	NaN	4	2	0	4	6
646	>sp|Q95JF4|DNAJ1_CHLAE DnaJ homolog subfamily A member 1 OS=Chlorocebus aethiops GN=DNAJA1 PE=2 SV=1	NaN	NaN	4	0	4	4
647	>tr|A0A0D9QW77|A0A0D9QW77_CHLSB Uncharacterized protein OS=Chlorocebus sabaeus GN=IST1 PE=4 SV=1	NaN	NaN	4	0	4	4
648	>tr|A0A0D9QXS8|A0A0D9QXS8_CHLSB Uncharacterized protein (Fragment) OS=Chlorocebus sabaeus PE=4 SV=1	NaN	NaN	4	0	4	4
649	>tr|A0A0D9QYU3|A0A0D9QYU3_CHLSB Uncharacterized protein OS=Chlorocebus sabaeus GN=LIN7C PE=4 SV=1	NaN	NaN	4	0	4	4
650	>tr|A0A0D9QZ04|A0A0D9QZ04_CHLSB Uncharacterized protein OS=Chlorocebus sabaeus GN=CDK2 PE=4 SV=1	NaN	NaN	4	0	4	4
651	>tr|A0A0D9QZM2|A0A0D9QZM2_CHLSB Uncharacterized protein OS=Chlorocebus sabaeus GN=MAP1S PE=4 SV=1	NaN	NaN	4	0	4	4
652	>tr|A0A0D9R279|A0A0D9R279_CHLSB Uncharacterized protein OS=Chlorocebus sabaeus GN=DNAJB6 PE=4 SV=1	NaN	NaN	4	0	4	4
653	>tr|A0A0D9R4H6|A0A0D9R4H6_CHLSB Uncharacterized protein OS=Chlorocebus sabaeus GN=TUBB2A PE=3 SV=1	NaN	4	NaN	0	4	4
654	>tr|A0A0D9R4I0|A0A0D9R4I0_CHLSB Uncharacterized protein OS=Chlorocebus sabaeus GN=SPTLC1 PE=4 SV=1	NaN	NaN	4	0	4	4
655	>tr|A0A0D9R4V8|A0A0D9R4V8_CHLSB DNA (cytosine-5)-methyltransferase OS=Chlorocebus sabaeus GN=DNMT1 PE=3 SV=1	NaN	NaN	4	0	4	4
656	>tr|A0A0D9R5X8|A0A0D9R5X8_CHLSB Uncharacterized protein OS=Chlorocebus sabaeus GN=HPRT1 PE=4 SV=1	NaN	NaN	4	0	4	4
657	>tr|A0A0D9R8Q5|A0A0D9R8Q5_CHLSB RNA binding protein fox-1 homolog OS=Chlorocebus sabaeus GN=RBFOX1 PE=4 SV=1	NaN	NaN	4	0	4	4
658	>tr|A0A0D9R949|A0A0D9R949_CHLSB Uncharacterized protein OS=Chlorocebus sabaeus GN=PUF60 PE=4 SV=1	NaN	NaN	4	0	4	4
659	>tr|A0A0D9REE9|A0A0D9REE9_CHLSB Uncharacterized protein OS=Chlorocebus sabaeus GN=TMCO1 PE=4 SV=1	NaN	NaN	4	0	4	4
660	>tr|A0A0D9REM0|A0A0D9REM0_CHLSB Small nuclear ribonucleoprotein-associated protein OS=Chlorocebus sabaeus GN=SNRPB PE=3 SV=1	NaN	4	NaN	0	4	4
661	>tr|A0A0D9RGB3|A0A0D9RGB3_CHLSB Uncharacterized protein OS=Chlorocebus sabaeus GN=HLTF PE=4 SV=1	NaN	NaN	4	0	4	4
662	>tr|A0A0D9RH35|A0A0D9RH35_CHLSB Uncharacterized protein OS=Chlorocebus sabaeus GN=PSMC2 PE=3 SV=1	4	NaN	NaN	0	4	4
663	>tr|A0A0D9RHM1|A0A0D9RHM1_CHLSB Uncharacterized protein OS=Chlorocebus sabaeus GN=CGNL1 PE=4 SV=1	NaN	NaN	4	0	4	4
664	>tr|A0A0D9RIB0|A0A0D9RIB0_CHLSB Uncharacterized protein OS=Chlorocebus sabaeus GN=DPYSL3 PE=4 SV=1	NaN	NaN	4	0	4	4
665	>tr|A0A0D9RK24|A0A0D9RK24_CHLSB Uncharacterized protein OS=Chlorocebus sabaeus GN=RBM25 PE=4 SV=1	NaN	4	NaN	0	4	4
666	>tr|A0A0D9RKP7|A0A0D9RKP7_CHLSB Uncharacterized protein OS=Chlorocebus sabaeus GN=LRPPRC PE=4 SV=1	NaN	NaN	4	0	4	4
667	>tr|A0A0D9RKV5|A0A0D9RKV5_CHLSB Enhancer of rudimentary homolog OS=Chlorocebus sabaeus GN=ERH PE=3 SV=1	NaN	NaN	4	0	4	4
668	>tr|A0A0D9RLK1|A0A0D9RLK1_CHLSB Uncharacterized protein OS=Chlorocebus sabaeus GN=EIF2S1 PE=4 SV=1	NaN	NaN	4	0	4	4
669	>tr|A0A0D9RM57|A0A0D9RM57_CHLSB Proteasome subunit beta type OS=Chlorocebus sabaeus GN=PSMB7 PE=3 SV=1	NaN	NaN	4	0	4	4
670	>tr|A0A0D9RQX3|A0A0D9RQX3_CHLSB Uncharacterized protein OS=Chlorocebus sabaeus GN=SRGAP2 PE=4 SV=1	NaN	NaN	4	0	4	4
671	>tr|A0A0D9RS60|A0A0D9RS60_CHLSB Uncharacterized protein OS=Chlorocebus sabaeus GN=GAK PE=4 SV=1	NaN	NaN	4	0	4	4
672	>tr|A0A0D9RS97|A0A0D9RS97_CHLSB Proteasome subunit alpha type OS=Chlorocebus sabaeus GN=PSMA2 PE=3 SV=1	NaN	NaN	4	0	4	4
673	>tr|A0A0D9RSY4|A0A0D9RSY4_CHLSB Uncharacterized protein (Fragment) OS=Chlorocebus sabaeus PE=4 SV=1	NaN	4	NaN	0	4	4
674	>tr|A0A0D9RUF1|A0A0D9RUF1_CHLSB S-adenosylmethionine synthase OS=Chlorocebus sabaeus GN=MAT2A PE=3 SV=1	NaN	NaN	4	0	4	4
675	>tr|A0A0D9RUP9|A0A0D9RUP9_CHLSB Uncharacterized protein OS=Chlorocebus sabaeus GN=YTHDF1 PE=4 SV=1	NaN	NaN	4	0	4	4
676	>tr|A0A0D9RY49|A0A0D9RY49_CHLSB Uncharacterized protein OS=Chlorocebus sabaeus GN=TUBB6 PE=3 SV=1	NaN	NaN	4	0	4	4
677	>tr|A0A0D9RYZ3|A0A0D9RYZ3_CHLSB Uncharacterized protein OS=Chlorocebus sabaeus GN=CYP3A5 PE=3 SV=1	NaN	NaN	4	0	4	4
678	>tr|A0A0D9RZ41|A0A0D9RZ41_CHLSB Uncharacterized protein OS=Chlorocebus sabaeus GN=DSG2 PE=4 SV=1	NaN	NaN	4	0	4	4
679	>tr|A0A0D9S024|A0A0D9S024_CHLSB Uncharacterized protein OS=Chlorocebus sabaeus GN=RFC2 PE=4 SV=1	NaN	NaN	4	0	4	4
680	>tr|A0A0D9S0P0|A0A0D9S0P0_CHLSB Uncharacterized protein OS=Chlorocebus sabaeus GN=GFAP PE=3 SV=1	NaN	NaN	4	0	4	4
681	>tr|A0A0D9S407|A0A0D9S407_CHLSB Uncharacterized protein OS=Chlorocebus sabaeus GN=AP2A1 PE=4 SV=1	NaN	NaN	4	0	4	4
682	>tr|A0A0D9S478|A0A0D9S478_CHLSB Uncharacterized protein OS=Chlorocebus sabaeus GN=MSANTD2 PE=4 SV=1	4	NaN	NaN	0	4	4
683	>tr|A0A0D9S4G6|A0A0D9S4G6_CHLSB Uncharacterized protein OS=Chlorocebus sabaeus GN=CIT PE=4 SV=1	NaN	NaN	4	0	4	4
684	>tr|A0A0D9S6G0|A0A0D9S6G0_CHLSB Uncharacterized protein OS=Chlorocebus sabaeus GN=ATP5F1 PE=4 SV=1	NaN	NaN	4	0	4	4
685	>tr|A0A0D9SDA4|A0A0D9SDA4_CHLSB Uncharacterized protein OS=Chlorocebus sabaeus GN=RBMXL2 PE=4 SV=1	NaN	NaN	4	0	4	4
686	>tr|A0A0D9SDK1|A0A0D9SDK1_CHLSB Uncharacterized protein (Fragment) OS=Chlorocebus sabaeus PE=4 SV=1	NaN	NaN	4	0	4	4
687	>tr|A0A0D9SE08|A0A0D9SE08_CHLSB Uncharacterized protein OS=Chlorocebus sabaeus GN=PURB PE=4 SV=1	NaN	NaN	4	0	4	4
688	>tr|A0A0D9QWU2|A0A0D9QWU2_CHLSB Uncharacterized protein OS=Chlorocebus sabaeus GN=SBSN PE=4 SV=1	3	3	NaN	0	3	6
689	>tr|A0A0D9RMU1|A0A0D9RMU1_CHLSB Uncharacterized protein OS=Chlorocebus sabaeus GN=IGLV1-51 PE=4 SV=1	NaN	3	3	0	3	6
690	>sp|Q2L9X0|RSSA_CHLAE 40S ribosomal protein SA OS=Chlorocebus aethiops GN=RPSA PE=2 SV=3	NaN	2	3	0	3	5
691	>tr|A0A0D9QV99|A0A0D9QV99_CHLSB Uncharacterized protein OS=Chlorocebus sabaeus GN=PSMC5 PE=3 SV=1	NaN	2	3	0	3	5
692	>tr|A0A0D9RBS5|A0A0D9RBS5_CHLSB Uncharacterized protein OS=Chlorocebus sabaeus GN=EWSR1 PE=4 SV=1	1	1	3	0	3	5
693	>tr|A0A0D9RF51|A0A0D9RF51_CHLSB Coronin OS=Chlorocebus sabaeus GN=CORO2A PE=3 SV=1	NaN	2	3	0	3	5
694	>tr|A0A0D9RB46|A0A0D9RB46_CHLSB Uncharacterized protein OS=Chlorocebus sabaeus GN=TUBB4A PE=3 SV=1	NaN	1	3	0	3	4
695	>tr|A0A0D9RVC2|A0A0D9RVC2_CHLSB Uncharacterized protein OS=Chlorocebus sabaeus PE=4 SV=1	3	1	NaN	0	3	4
696	>tr|A0A0D9QVE7|A0A0D9QVE7_CHLSB Uncharacterized protein (Fragment) OS=Chlorocebus sabaeus GN=NAV3 PE=4 SV=1	NaN	NaN	3	0	3	3
697	>tr|A0A0D9QVJ4|A0A0D9QVJ4_CHLSB Eukaryotic translation initiation factor 3 subunit K OS=Chlorocebus sabaeus GN=EIF3K PE=3 SV=1	NaN	NaN	3	0	3	3
698	>tr|A0A0D9QW67|A0A0D9QW67_CHLSB Uncharacterized protein OS=Chlorocebus sabaeus GN=TBCB PE=4 SV=1	NaN	NaN	3	0	3	3
699	>tr|A0A0D9QYF9|A0A0D9QYF9_CHLSB Uncharacterized protein OS=Chlorocebus sabaeus GN=NDUFA13 PE=4 SV=1	NaN	NaN	3	0	3	3
700	>tr|A0A0D9QZD3|A0A0D9QZD3_CHLSB Uncharacterized protein OS=Chlorocebus sabaeus GN=LRRC59 PE=4 SV=1	NaN	NaN	3	0	3	3
701	>tr|A0A0D9R0Z6|A0A0D9R0Z6_CHLSB Glycerol-3-phosphate dehydrogenase [NAD(+)] OS=Chlorocebus sabaeus GN=GPD1 PE=3 SV=1	3	NaN	NaN	0	3	3
702	>tr|A0A0D9R3H4|A0A0D9R3H4_CHLSB Uncharacterized protein OS=Chlorocebus sabaeus GN=SSR4 PE=4 SV=1	NaN	NaN	3	0	3	3
703	>tr|A0A0D9R6B6|A0A0D9R6B6_CHLSB Eukaryotic translation initiation factor 3 subunit D OS=Chlorocebus sabaeus GN=EIF3D PE=3 SV=1	NaN	NaN	3	0	3	3
704	>tr|A0A0D9R8J7|A0A0D9R8J7_CHLSB Uncharacterized protein OS=Chlorocebus sabaeus GN=DNAJC9 PE=4 SV=1	NaN	NaN	3	0	3	3
705	>tr|A0A0D9R8M6|A0A0D9R8M6_CHLSB Uncharacterized protein OS=Chlorocebus sabaeus GN=RUNX1 PE=4 SV=1	NaN	NaN	3	0	3	3
706	>tr|A0A0D9R8X3|A0A0D9R8X3_CHLSB Uncharacterized protein OS=Chlorocebus sabaeus GN=RQCD1 PE=4 SV=1	NaN	NaN	3	0	3	3
707	>tr|A0A0D9RA47|A0A0D9RA47_CHLSB Uncharacterized protein OS=Chlorocebus sabaeus GN=CDHR2 PE=4 SV=1	NaN	3	NaN	0	3	3
708	>tr|A0A0D9RB24|A0A0D9RB24_CHLSB Uncharacterized protein OS=Chlorocebus sabaeus GN=NAP1L4 PE=3 SV=1	NaN	NaN	3	0	3	3
709	>tr|A0A0D9RB41|A0A0D9RB41_CHLSB Protein argonaute-2 OS=Chlorocebus sabaeus GN=AGO2 PE=3 SV=1	NaN	NaN	3	0	3	3
710	>tr|A0A0D9RCP3|A0A0D9RCP3_CHLSB Uncharacterized protein OS=Chlorocebus sabaeus GN=TRAF3 PE=4 SV=1	NaN	3	NaN	0	3	3
711	>tr|A0A0D9RED4|A0A0D9RED4_CHLSB Uncharacterized protein OS=Chlorocebus sabaeus GN=MRPL22 PE=3 SV=1	NaN	NaN	3	0	3	3
712	>tr|A0A0D9RFZ5|A0A0D9RFZ5_CHLSB Uncharacterized protein OS=Chlorocebus sabaeus GN=SPATS2L PE=4 SV=1	NaN	NaN	3	0	3	3
713	>tr|A0A0D9RGR4|A0A0D9RGR4_CHLSB Kinesin-like protein OS=Chlorocebus sabaeus GN=KIF5B PE=3 SV=1	3	NaN	NaN	0	3	3
714	>tr|A0A0D9RI83|A0A0D9RI83_CHLSB Uncharacterized protein OS=Chlorocebus sabaeus GN=EIF2S2 PE=4 SV=1	NaN	NaN	3	0	3	3
715	>tr|A0A0D9RIR4|A0A0D9RIR4_CHLSB Uncharacterized protein OS=Chlorocebus sabaeus GN=PTBP3 PE=4 SV=1	NaN	NaN	3	0	3	3
716	>tr|A0A0D9RK34|A0A0D9RK34_CHLSB Uncharacterized protein OS=Chlorocebus sabaeus GN=FNDC3B PE=4 SV=1	NaN	NaN	3	0	3	3
717	>tr|A0A0D9RM49|A0A0D9RM49_CHLSB Uncharacterized protein OS=Chlorocebus sabaeus GN=STAU2 PE=4 SV=1	NaN	NaN	3	0	3	3
718	>tr|A0A0D9RMJ8|A0A0D9RMJ8_CHLSB Uncharacterized protein OS=Chlorocebus sabaeus GN=RPN2 PE=4 SV=1	NaN	NaN	3	0	3	3
719	>tr|A0A0D9RMT3|A0A0D9RMT3_CHLSB Uncharacterized protein OS=Chlorocebus sabaeus PE=4 SV=1	NaN	3	NaN	0	3	3
720	>tr|A0A0D9RQQ3|A0A0D9RQQ3_CHLSB Uncharacterized protein OS=Chlorocebus sabaeus GN=FAM78A PE=4 SV=1	NaN	3	NaN	0	3	3
721	>tr|A0A0D9RR51|A0A0D9RR51_CHLSB Uncharacterized protein OS=Chlorocebus sabaeus GN=PSMC6 PE=3 SV=1	3	NaN	NaN	0	3	3
722	>tr|A0A0D9RR53|A0A0D9RR53_CHLSB Uncharacterized protein OS=Chlorocebus sabaeus GN=GFPT1 PE=4 SV=1	NaN	NaN	3	0	3	3
723	>tr|A0A0D9RRI0|A0A0D9RRI0_CHLSB Uncharacterized protein OS=Chlorocebus sabaeus GN=DHFR PE=3 SV=1	NaN	NaN	3	0	3	3
724	>tr|A0A0D9RRS2|A0A0D9RRS2_CHLSB Uncharacterized protein OS=Chlorocebus sabaeus GN=ATP6V1B1 PE=3 SV=1	3	NaN	NaN	0	3	3
725	>tr|A0A0D9RVC3|A0A0D9RVC3_CHLSB Uncharacterized protein OS=Chlorocebus sabaeus GN=SUPT16H PE=4 SV=1	NaN	NaN	3	0	3	3
726	>tr|A0A0D9RVK4|A0A0D9RVK4_CHLSB Uncharacterized protein OS=Chlorocebus sabaeus GN=HNRNPC PE=4 SV=1	NaN	NaN	3	0	3	3
727	>tr|A0A0D9RVV7|A0A0D9RVV7_CHLSB Uncharacterized protein OS=Chlorocebus sabaeus GN=CLASP1 PE=4 SV=1	NaN	NaN	3	0	3	3
728	>tr|A0A0D9RWF4|A0A0D9RWF4_CHLSB Uncharacterized protein OS=Chlorocebus sabaeus GN=CTNNB1 PE=4 SV=1	NaN	3	NaN	0	3	3
729	>tr|A0A0D9RWJ3|A0A0D9RWJ3_CHLSB Uncharacterized protein OS=Chlorocebus sabaeus GN=RPL9 PE=4 SV=1	NaN	NaN	3	0	3	3
730	>tr|A0A0D9RXD9|A0A0D9RXD9_CHLSB Signal peptidase complex catalytic subunit SEC11 OS=Chlorocebus sabaeus GN=SEC11A PE=3 SV=1	NaN	NaN	3	0	3	3
731	>tr|A0A0D9RY48|A0A0D9RY48_CHLSB Uncharacterized protein OS=Chlorocebus sabaeus GN=AFG3L2 PE=3 SV=1	NaN	3	NaN	0	3	3
732	>tr|A0A0D9RZ59|A0A0D9RZ59_CHLSB Uncharacterized protein OS=Chlorocebus sabaeus GN=SPG20 PE=4 SV=1	NaN	NaN	3	0	3	3
733	>tr|A0A0D9RZ78|A0A0D9RZ78_CHLSB Uncharacterized protein OS=Chlorocebus sabaeus GN=RFC3 PE=4 SV=1	NaN	NaN	3	0	3	3
734	>tr|A0A0D9S294|A0A0D9S294_CHLSB Uncharacterized protein OS=Chlorocebus sabaeus GN=HSP90B1 PE=3 SV=1	3	NaN	NaN	0	3	3
735	>tr|A0A0D9S2C1|A0A0D9S2C1_CHLSB Uncharacterized protein OS=Chlorocebus sabaeus GN=CDKN2AIP PE=4 SV=1	NaN	NaN	3	0	3	3
736	>tr|A0A0D9S2I6|A0A0D9S2I6_CHLSB Uncharacterized protein OS=Chlorocebus sabaeus GN=NUAK1 PE=4 SV=1	NaN	NaN	3	0	3	3
737	>tr|A0A0D9S338|A0A0D9S338_CHLSB Uncharacterized protein OS=Chlorocebus sabaeus GN=RUVBL2 PE=4 SV=1	NaN	NaN	3	0	3	3
738	>tr|A0A0D9S3I3|A0A0D9S3I3_CHLSB Serine/threonine-protein phosphatase OS=Chlorocebus sabaeus GN=PPP1CC PE=3 SV=1	NaN	NaN	3	0	3	3
739	>tr|A0A0D9S3W7|A0A0D9S3W7_CHLSB Uncharacterized protein OS=Chlorocebus sabaeus PE=4 SV=1	NaN	NaN	3	0	3	3
740	>tr|A0A0D9S7J3|A0A0D9S7J3_CHLSB Uncharacterized protein OS=Chlorocebus sabaeus GN=CDC20 PE=4 SV=1	NaN	NaN	3	0	3	3
741	>tr|A0A0D9S7M1|A0A0D9S7M1_CHLSB CTP synthase OS=Chlorocebus sabaeus GN=CTPS1 PE=3 SV=1	NaN	NaN	3	0	3	3
742	>tr|A0A0D9S897|A0A0D9S897_CHLSB Uncharacterized protein OS=Chlorocebus sabaeus GN=HNRNPR PE=4 SV=1	NaN	NaN	3	0	3	3
743	>tr|A0A0D9S9G5|A0A0D9S9G5_CHLSB Uncharacterized protein OS=Chlorocebus sabaeus GN=CDK1 PE=4 SV=1	NaN	NaN	3	0	3	3
744	>tr|A0A0D9SCC3|A0A0D9SCC3_CHLSB Uncharacterized protein OS=Chlorocebus sabaeus GN=PSMC1 PE=3 SV=1	3	NaN	NaN	0	3	3
745	>tr|A0A0D9SCQ7|A0A0D9SCQ7_CHLSB Uncharacterized protein OS=Chlorocebus sabaeus PE=4 SV=1	NaN	NaN	3	0	3	3
746	>tr|A0A0D9QZ87|A0A0D9QZ87_CHLSB Uncharacterized protein OS=Chlorocebus sabaeus GN=DCD PE=4 SV=1	2	2	2	0	2	6
747	>tr|A0A0D9RE84|A0A0D9RE84_CHLSB Uncharacterized protein OS=Chlorocebus sabaeus GN=SNRPD3 PE=4 SV=1	NaN	2	2	0	2	4
748	>tr|A0A0D9QUH9|A0A0D9QUH9_CHLSB Uncharacterized protein OS=Chlorocebus sabaeus GN=SNRPA PE=4 SV=1	NaN	2	1	0	2	3
749	>sp|P67988|PRIO_CHLAE Major prion protein OS=Chlorocebus aethiops GN=PRNP PE=3 SV=1	NaN	NaN	2	0	2	2
750	>sp|Q2IBA5|CAV1_CHLAE Caveolin-1 OS=Chlorocebus aethiops GN=CAV1 PE=3 SV=1	NaN	NaN	2	0	2	2
751	>sp|Q9MZE0|C1QBP_CHLAE Complement component 1 Q subcomponent-binding protein- mitochondrial OS=Chlorocebus aethiops GN=C1QBP PE=1 SV=2	NaN	2	NaN	0	2	2
752	>tr|A0A0D9QVU1|A0A0D9QVU1_CHLSB Uncharacterized protein OS=Chlorocebus sabaeus GN=EIF4E PE=3 SV=1	NaN	NaN	2	0	2	2
753	>tr|A0A0D9QWM7|A0A0D9QWM7_CHLSB Eukaryotic translation initiation factor 3 subunit F OS=Chlorocebus sabaeus GN=EIF3F PE=3 SV=1	NaN	NaN	2	0	2	2
754	>tr|A0A0D9R014|A0A0D9R014_CHLSB Uncharacterized protein OS=Chlorocebus sabaeus GN=SRSF1 PE=4 SV=1	NaN	NaN	2	0	2	2
755	>tr|A0A0D9R1Y8|A0A0D9R1Y8_CHLSB Uncharacterized protein OS=Chlorocebus sabaeus GN=GIPC1 PE=4 SV=1	2	NaN	NaN	0	2	2
756	>tr|A0A0D9R360|A0A0D9R360_CHLSB Uncharacterized protein OS=Chlorocebus sabaeus GN=EMD PE=4 SV=1	NaN	NaN	2	0	2	2
757	>tr|A0A0D9R4H8|A0A0D9R4H8_CHLSB Uncharacterized protein OS=Chlorocebus sabaeus GN=TUBB2B PE=3 SV=1	NaN	NaN	2	0	2	2
758	>tr|A0A0D9R7Z4|A0A0D9R7Z4_CHLSB Uncharacterized protein OS=Chlorocebus sabaeus GN=HNRNPK PE=4 SV=1	NaN	NaN	2	0	2	2
759	>tr|A0A0D9R963|A0A0D9R963_CHLSB Uncharacterized protein OS=Chlorocebus sabaeus GN=SYNPO2L PE=4 SV=1	2	NaN	NaN	0	2	2
760	>tr|A0A0D9R9F0|A0A0D9R9F0_CHLSB Uncharacterized protein OS=Chlorocebus sabaeus GN=TNS1 PE=4 SV=1	NaN	2	NaN	0	2	2
761	>tr|A0A0D9RAA7|A0A0D9RAA7_CHLSB DNA-directed RNA polymerase OS=Chlorocebus sabaeus GN=POLR3A PE=3 SV=1	2	NaN	NaN	0	2	2
762	>tr|A0A0D9RAE7|A0A0D9RAE7_CHLSB Uncharacterized protein (Fragment) OS=Chlorocebus sabaeus PE=4 SV=1	NaN	NaN	2	0	2	2
763	>tr|A0A0D9RCN6|A0A0D9RCN6_CHLSB Uncharacterized protein OS=Chlorocebus sabaeus GN=DCTN3 PE=4 SV=1	NaN	NaN	2	0	2	2
764	>tr|A0A0D9RH26|A0A0D9RH26_CHLSB Uncharacterized protein OS=Chlorocebus sabaeus GN=SF3A2 PE=4 SV=1	2	NaN	NaN	0	2	2
765	>tr|A0A0D9RIX6|A0A0D9RIX6_CHLSB Uncharacterized protein OS=Chlorocebus sabaeus GN=MTDH PE=4 SV=1	NaN	NaN	2	0	2	2
766	>tr|A0A0D9RIY7|A0A0D9RIY7_CHLSB Syndecan (Fragment) OS=Chlorocebus sabaeus GN=SDC2 PE=3 SV=1	NaN	NaN	2	0	2	2
767	>tr|A0A0D9RM73|A0A0D9RM73_CHLSB Uncharacterized protein OS=Chlorocebus sabaeus PE=4 SV=1	2	NaN	NaN	0	2	2
768	>tr|A0A0D9RNG4|A0A0D9RNG4_CHLSB Uncharacterized protein OS=Chlorocebus sabaeus GN=IGF2BP2 PE=4 SV=1	NaN	NaN	2	0	2	2
769	>tr|A0A0D9RPH9|A0A0D9RPH9_CHLSB Alpha-mannosidase OS=Chlorocebus sabaeus GN=MAN2C1 PE=3 SV=1	NaN	NaN	2	0	2	2
770	>tr|A0A0D9RQJ9|A0A0D9RQJ9_CHLSB Uncharacterized protein OS=Chlorocebus sabaeus GN=AIM1 PE=4 SV=1	NaN	NaN	2	0	2	2
771	>tr|A0A0D9RS41|A0A0D9RS41_CHLSB Uncharacterized protein OS=Chlorocebus sabaeus GN=STK39 PE=4 SV=1	NaN	NaN	2	0	2	2
772	>tr|A0A0D9RSR7|A0A0D9RSR7_CHLSB Uncharacterized protein OS=Chlorocebus sabaeus GN=NPEPL1 PE=4 SV=1	2	NaN	NaN	0	2	2
773	>tr|A0A0D9RTF7|A0A0D9RTF7_CHLSB Uncharacterized protein OS=Chlorocebus sabaeus GN=INPP5E PE=4 SV=1	NaN	NaN	2	0	2	2
774	>tr|A0A0D9RU02|A0A0D9RU02_CHLSB Uncharacterized protein OS=Chlorocebus sabaeus GN=AFAP1 PE=4 SV=1	NaN	NaN	2	0	2	2
775	>tr|A0A0D9RVI2|A0A0D9RVI2_CHLSB Uncharacterized protein OS=Chlorocebus sabaeus PE=4 SV=1	NaN	2	NaN	0	2	2
776	>tr|A0A0D9RX36|A0A0D9RX36_CHLSB Uncharacterized protein OS=Chlorocebus sabaeus GN=RAI14 PE=4 SV=1	NaN	2	NaN	0	2	2
777	>tr|A0A0D9RYA8|A0A0D9RYA8_CHLSB Uncharacterized protein OS=Chlorocebus sabaeus GN=RAB12 PE=4 SV=1	NaN	NaN	2	0	2	2
778	>tr|A0A0D9RZ28|A0A0D9RZ28_CHLSB DNA helicase OS=Chlorocebus sabaeus GN=MCM7 PE=3 SV=1	NaN	NaN	2	0	2	2
779	>tr|A0A0D9RZJ4|A0A0D9RZJ4_CHLSB Uncharacterized protein OS=Chlorocebus sabaeus GN=AP1S1 PE=4 SV=1	NaN	NaN	2	0	2	2
780	>tr|A0A0D9S150|A0A0D9S150_CHLSB Uncharacterized protein OS=Chlorocebus sabaeus GN=PAFAH1B3 PE=4 SV=1	NaN	NaN	2	0	2	2
781	>tr|A0A0D9S2Q6|A0A0D9S2Q6_CHLSB Uncharacterized protein OS=Chlorocebus sabaeus GN=APRT PE=3 SV=1	NaN	NaN	2	0	2	2
782	>tr|A0A0D9S323|A0A0D9S323_CHLSB Uncharacterized protein OS=Chlorocebus sabaeus GN=CDC6 PE=4 SV=1	NaN	NaN	2	0	2	2
783	>tr|A0A0D9S429|A0A0D9S429_CHLSB Uncharacterized protein OS=Chlorocebus sabaeus GN=PNKP PE=4 SV=1	NaN	NaN	2	0	2	2
784	>tr|A0A0D9S5M6|A0A0D9S5M6_CHLSB Uncharacterized protein (Fragment) OS=Chlorocebus sabaeus GN=ILF2 PE=4 SV=1	NaN	NaN	2	0	2	2
785	>tr|A0A0D9S854|A0A0D9S854_CHLSB Uncharacterized protein OS=Chlorocebus sabaeus GN=ZNF593 PE=4 SV=1	NaN	NaN	2	0	2	2
786	>tr|A0A0D9SDV2|A0A0D9SDV2_CHLSB Uncharacterized protein OS=Chlorocebus sabaeus PE=3 SV=1	NaN	NaN	2	0	2	2
787	>tr|D9MWX4|D9MWX4_CHLAE Non-muscle myosin IIA (Fragment) OS=Chlorocebus aethiops PE=2 SV=1	NaN	2	NaN	0	2	2
788	>sp|P26455|COX2_CHLAE Cytochrome c oxidase subunit 2 OS=Chlorocebus aethiops GN=MT-CO2 PE=3 SV=1	NaN	1	NaN	0	1	1
789	>tr|A0A0D9QWZ1|A0A0D9QWZ1_CHLSB Uncharacterized protein OS=Chlorocebus sabaeus GN=BUB3 PE=4 SV=1	NaN	NaN	1	0	1	1
790	>tr|A0A0D9QXF7|A0A0D9QXF7_CHLSB Proteasome subunit alpha type OS=Chlorocebus sabaeus PE=3 SV=1	NaN	NaN	1	0	1	1
791	>tr|A0A0D9QXG7|A0A0D9QXG7_CHLSB Uncharacterized protein OS=Chlorocebus sabaeus GN=MRPS7 PE=4 SV=1	NaN	NaN	1	0	1	1
792	>tr|A0A0D9QYF8|A0A0D9QYF8_CHLSB Uncharacterized protein OS=Chlorocebus sabaeus GN=RBMS2 PE=4 SV=1	NaN	NaN	1	0	1	1
793	>tr|A0A0D9QZK2|A0A0D9QZK2_CHLSB Uncharacterized protein (Fragment) OS=Chlorocebus sabaeus GN=TRAF6 PE=4 SV=1	NaN	1	NaN	0	1	1
794	>tr|A0A0D9R0W0|A0A0D9R0W0_CHLSB Uncharacterized protein OS=Chlorocebus sabaeus GN=SSRP1 PE=4 SV=1	NaN	NaN	1	0	1	1
795	>tr|A0A0D9R122|A0A0D9R122_CHLSB Uncharacterized protein OS=Chlorocebus sabaeus GN=CA4 PE=4 SV=1	1	NaN	NaN	0	1	1
796	>tr|A0A0D9R1Q7|A0A0D9R1Q7_CHLSB Uncharacterized protein OS=Chlorocebus sabaeus GN=PRPF19 PE=4 SV=1	NaN	NaN	1	0	1	1
797	>tr|A0A0D9R272|A0A0D9R272_CHLSB Uncharacterized protein OS=Chlorocebus sabaeus GN=CPSF7 PE=4 SV=1	NaN	NaN	1	0	1	1
798	>tr|A0A0D9R314|A0A0D9R314_CHLSB Uncharacterized protein OS=Chlorocebus sabaeus GN=POLR2G PE=4 SV=1	NaN	NaN	1	0	1	1
799	>tr|A0A0D9R3E5|A0A0D9R3E5_CHLSB Uncharacterized protein OS=Chlorocebus sabaeus GN=PLA2G16 PE=4 SV=1	NaN	NaN	1	0	1	1
800	>tr|A0A0D9R419|A0A0D9R419_CHLSB Uncharacterized protein OS=Chlorocebus sabaeus GN=EMC4 PE=4 SV=1	NaN	NaN	1	0	1	1
801	>tr|A0A0D9R626|A0A0D9R626_CHLSB Uncharacterized protein OS=Chlorocebus sabaeus GN=FARSB PE=4 SV=1	NaN	NaN	1	0	1	1
802	>tr|A0A0D9R8S7|A0A0D9R8S7_CHLSB Uncharacterized protein OS=Chlorocebus sabaeus GN=CYC1 PE=4 SV=1	NaN	NaN	1	0	1	1
803	>tr|A0A0D9RAG2|A0A0D9RAG2_CHLSB Uncharacterized protein OS=Chlorocebus sabaeus GN=FAF2 PE=4 SV=1	NaN	NaN	1	0	1	1
804	>tr|A0A0D9RCR5|A0A0D9RCR5_CHLSB Uncharacterized protein OS=Chlorocebus sabaeus GN=RARS PE=3 SV=1	NaN	NaN	1	0	1	1
805	>tr|A0A0D9RD80|A0A0D9RD80_CHLSB Uncharacterized protein OS=Chlorocebus sabaeus GN=MLF2 PE=4 SV=1	NaN	NaN	1	0	1	1
806	>tr|A0A0D9RDN5|A0A0D9RDN5_CHLSB Uncharacterized protein OS=Chlorocebus sabaeus PE=4 SV=1	NaN	1	NaN	0	1	1
807	>tr|A0A0D9RE92|A0A0D9RE92_CHLSB Uncharacterized protein OS=Chlorocebus sabaeus GN=RAB6B PE=4 SV=1	NaN	NaN	1	0	1	1
808	>tr|A0A0D9REG4|A0A0D9REG4_CHLSB Uncharacterized protein OS=Chlorocebus sabaeus GN=CASP8 PE=3 SV=1	NaN	NaN	1	0	1	1
809	>tr|A0A0D9RHD1|A0A0D9RHD1_CHLSB Uncharacterized protein OS=Chlorocebus sabaeus PE=4 SV=1	NaN	NaN	1	0	1	1
810	>tr|A0A0D9RHK0|A0A0D9RHK0_CHLSB Uncharacterized protein OS=Chlorocebus sabaeus GN=MRPS14 PE=4 SV=1	NaN	NaN	1	0	1	1
811	>tr|A0A0D9RIL6|A0A0D9RIL6_CHLSB Uncharacterized protein OS=Chlorocebus sabaeus PE=4 SV=1	NaN	NaN	1	0	1	1
812	>tr|A0A0D9RIT0|A0A0D9RIT0_CHLSB Uncharacterized protein OS=Chlorocebus sabaeus GN=HSDL2 PE=4 SV=1	NaN	1	NaN	0	1	1
813	>tr|A0A0D9RJK9|A0A0D9RJK9_CHLSB Uncharacterized protein OS=Chlorocebus sabaeus GN=FAM195A PE=4 SV=1	NaN	NaN	1	0	1	1
814	>tr|A0A0D9RL76|A0A0D9RL76_CHLSB Uncharacterized protein OS=Chlorocebus sabaeus GN=HDAC6 PE=4 SV=1	NaN	NaN	1	0	1	1
815	>tr|A0A0D9RM84|A0A0D9RM84_CHLSB Uncharacterized protein OS=Chlorocebus sabaeus GN=AP2M1 PE=4 SV=1	NaN	NaN	1	0	1	1
816	>tr|A0A0D9RMA6|A0A0D9RMA6_CHLSB Uncharacterized protein OS=Chlorocebus sabaeus GN=MSH6 PE=3 SV=1	NaN	NaN	1	0	1	1
817	>tr|A0A0D9RMR8|A0A0D9RMR8_CHLSB Clustered mitochondria protein homolog OS=Chlorocebus sabaeus GN=CLUH PE=3 SV=1	NaN	NaN	1	0	1	1
818	>tr|A0A0D9RPM3|A0A0D9RPM3_CHLSB Proteasome subunit alpha type OS=Chlorocebus sabaeus GN=PSMA3 PE=3 SV=1	NaN	NaN	1	0	1	1
819	>tr|A0A0D9RTM8|A0A0D9RTM8_CHLSB Uncharacterized protein OS=Chlorocebus sabaeus GN=SUCLG1 PE=3 SV=1	NaN	1	NaN	0	1	1
820	>tr|A0A0D9RU51|A0A0D9RU51_CHLSB Uncharacterized protein OS=Chlorocebus sabaeus GN=LANCL2 PE=4 SV=1	NaN	NaN	1	0	1	1
821	>tr|A0A0D9RV97|A0A0D9RV97_CHLSB Uncharacterized protein OS=Chlorocebus sabaeus GN=DHX29 PE=4 SV=1	NaN	NaN	1	0	1	1
822	>tr|A0A0D9RWH9|A0A0D9RWH9_CHLSB Uncharacterized protein OS=Chlorocebus sabaeus GN=TUBA3D PE=3 SV=1	1	NaN	NaN	0	1	1
823	>tr|A0A0D9RYF8|A0A0D9RYF8_CHLSB Uncharacterized protein OS=Chlorocebus sabaeus GN=TYMS PE=3 SV=1	NaN	NaN	1	0	1	1
824	>tr|A0A0D9S1T8|A0A0D9S1T8_CHLSB Uncharacterized protein OS=Chlorocebus sabaeus GN=PTRF PE=4 SV=1	NaN	NaN	1	0	1	1
825	>tr|A0A0D9S3A0|A0A0D9S3A0_CHLSB Uncharacterized protein OS=Chlorocebus sabaeus GN=TUBB3 PE=3 SV=1	NaN	NaN	1	0	1	1
826	>tr|A0A0D9S3N4|A0A0D9S3N4_CHLSB Uncharacterized protein OS=Chlorocebus sabaeus GN=ARCN1 PE=4 SV=1	NaN	NaN	1	0	1	1
827	>tr|A0A0D9S3R7|A0A0D9S3R7_CHLSB Uncharacterized protein OS=Chlorocebus sabaeus PE=4 SV=1	1	NaN	NaN	0	1	1
828	>tr|A0A0D9S3W2|A0A0D9S3W2_CHLSB Transgelin OS=Chlorocebus sabaeus GN=TAGLN2 PE=3 SV=1	NaN	NaN	1	0	1	1
829	>tr|A0A0D9S6X8|A0A0D9S6X8_CHLSB Uncharacterized protein OS=Chlorocebus sabaeus GN=NEXN PE=4 SV=1	NaN	NaN	1	0	1	1
830	>tr|A0A0D9S704|A0A0D9S704_CHLSB Uncharacterized protein OS=Chlorocebus sabaeus GN=SRSF11 PE=4 SV=1	NaN	NaN	1	0	1	1
831	>tr|A0A0D9S805|A0A0D9S805_CHLSB Uncharacterized protein OS=Chlorocebus sabaeus GN=YTHDF2 PE=4 SV=1	NaN	NaN	1	0	1	1
832	>tr|A0A0D9S8E6|A0A0D9S8E6_CHLSB Uncharacterized protein OS=Chlorocebus sabaeus GN=ALDH4A1 PE=3 SV=1	1	NaN	NaN	0	1	1
833	>tr|A0A0D9SCB4|A0A0D9SCB4_CHLSB Uncharacterized protein OS=Chlorocebus sabaeus GN=BASP1 PE=4 SV=1	NaN	NaN	1	0	1	1
834	>tr|G3KJ96|G3KJ96_CHLAE Apobec3DE (Fragment) OS=Chlorocebus aethiops GN=Apobec3DE PE=4 SV=1	NaN	NaN	1	0	1	1
835	>sp|K2C1_HUMAN|(Common contaminant protein)	1102	1003	1217	1	1217	3322
836	>sp|K22E_HUMAN|(Common contaminant protein)	777	1122	642	1	1122	2541
837	>sp|ALBU_BOVIN|(Common contaminant protein)	1064	879	837	1	1064	2780
838	>sp|K1C10_HUMAN|(Common contaminant protein)	692	759	586	1	759	2037
839	>sp|K1C9_HUMAN|(Common contaminant protein)	568	563	487	1	568	1618
840	>Reverse >tr|A0A0D9RMV4|A0A0D9RMV4_CHLSB Uncharacterized protein OS=Chlorocebus sabaeus GN=TSR1 PE=4 SV=1	136	155	70	1	155	361
841	>Reverse >tr|A0A0D9QVF2|A0A0D9QVF2_CHLSB Uncharacterized protein OS=Chlorocebus sabaeus GN=DKK2 PE=4 SV=1	119	143	145	1	145	407
842	>sp|TRYP_PIG|(Common contaminant protein)	111	108	111	1	111	330
843	>Reverse >tr|A0A0D9R269|A0A0D9R269_CHLSB Uncharacterized protein OS=Chlorocebus sabaeus GN=KIAA0556 PE=4 SV=1	91	110	99	1	110	300
844	>Reverse >tr|A0A0D9RYX2|A0A0D9RYX2_CHLSB Uncharacterized protein OS=Chlorocebus sabaeus GN=ENOX1 PE=4 SV=1	NaN	85	NaN	1	85	85
845	>Reverse >tr|A0A0D9S5C2|A0A0D9S5C2_CHLSB Uncharacterized protein OS=Chlorocebus sabaeus GN=SHC1 PE=4 SV=1	41	79	41	1	79	161
846	>Reverse >tr|A0A0D9RIB7|A0A0D9RIB7_CHLSB Uncharacterized protein OS=Chlorocebus sabaeus GN=ZNF483 PE=4 SV=1	65	69	43	1	69	177
847	>Reverse >tr|A0A0D9S262|A0A0D9S262_CHLSB Uncharacterized protein OS=Chlorocebus sabaeus GN=DYNC2H1 PE=4 SV=1	63	44	64	1	64	171
848	>sp|CO3_HUMAN|(Common contaminant protein)	42	20	14	1	42	76
849	>Reverse >tr|A0A0D9R346|A0A0D9R346_CHLSB Uncharacterized protein OS=Chlorocebus sabaeus GN=ARID2 PE=4 SV=1	NaN	41	NaN	1	41	41
850	>Reverse >tr|A0A0D9S8B8|A0A0D9S8B8_CHLSB Uncharacterized protein OS=Chlorocebus sabaeus PE=3 SV=1	NaN	36	NaN	1	36	36
851	>Reverse >tr|A0A0D9RGQ0|A0A0D9RGQ0_CHLSB Uncharacterized protein OS=Chlorocebus sabaeus GN=SPATA7 PE=4 SV=1	31	30	26	1	31	87
852	>Reverse >tr|A0A0D9RIA0|A0A0D9RIA0_CHLSB Uncharacterized protein OS=Chlorocebus sabaeus GN=KIAA0368 PE=4 SV=1	17	28	12	1	28	57
853	>sp|CAS1_BOVIN|(Common contaminant protein)	20	24	20	1	24	64
854	>Reverse >tr|A0A0D9RJC5|A0A0D9RJC5_CHLSB Uncharacterized protein OS=Chlorocebus sabaeus GN=AKAP9 PE=4 SV=1	23	NaN	NaN	1	23	23
855	>Reverse >tr|A0A0D9RSI0|A0A0D9RSI0_CHLSB Uncharacterized protein OS=Chlorocebus sabaeus GN=MBIP PE=4 SV=1	NaN	NaN	23	1	23	23
856	>Reverse >tr|A0A0D9RMC3|A0A0D9RMC3_CHLSB Uncharacterized protein OS=Chlorocebus sabaeus GN=TERF1 PE=4 SV=1	NaN	NaN	19	1	19	19
857	>Reverse >tr|A0A0D9RP07|A0A0D9RP07_CHLSB Uncharacterized protein OS=Chlorocebus sabaeus GN=CERCAM PE=4 SV=1	NaN	NaN	19	1	19	19
858	>Reverse >tr|A0A0D9R1A8|A0A0D9R1A8_CHLSB Uncharacterized protein OS=Chlorocebus sabaeus GN=ABI3BP PE=4 SV=1	18	NaN	14	1	18	32
859	>Reverse >tr|A0A0D9RMY2|A0A0D9RMY2_CHLSB Kinesin-like protein OS=Chlorocebus sabaeus GN=KIF21B PE=3 SV=1	18	NaN	NaN	1	18	18
860	>Reverse >tr|A0A0D9R1B4|A0A0D9R1B4_CHLSB Kinesin-like protein OS=Chlorocebus sabaeus GN=KIF22 PE=3 SV=1	NaN	NaN	17	1	17	17
861	>Reverse >tr|A0A0D9R1Z1|A0A0D9R1Z1_CHLSB Uncharacterized protein (Fragment) OS=Chlorocebus sabaeus GN=TMEM132E PE=4 SV=1	14	14	9	1	14	37
862	>Reverse >tr|A0A0D9S3X4|A0A0D9S3X4_CHLSB Uncharacterized protein OS=Chlorocebus sabaeus GN=SCAF1 PE=4 SV=1	14	3	NaN	1	14	17
863	>Reverse >tr|A0A0D9S2L6|A0A0D9S2L6_CHLSB Uncharacterized protein OS=Chlorocebus sabaeus GN=GLTSCR1 PE=4 SV=1	NaN	NaN	14	1	14	14
864	>Reverse >tr|A0A0D9R5R6|A0A0D9R5R6_CHLSB Uncharacterized protein OS=Chlorocebus sabaeus GN=DOCK10 PE=4 SV=1	12	NaN	NaN	1	12	12
865	>Reverse >tr|A0A0D9RNQ3|A0A0D9RNQ3_CHLSB Uncharacterized protein OS=Chlorocebus sabaeus GN=SLC27A6 PE=4 SV=1	NaN	NaN	12	1	12	12
866	>sp|ALBU_HUMAN|(Common contaminant protein)	11	5	3	1	11	19
867	>Reverse >tr|A0A0D9QZ17|A0A0D9QZ17_CHLSB Uncharacterized protein OS=Chlorocebus sabaeus GN=IRX3 PE=4 SV=1	NaN	NaN	11	1	11	11
868	>sp|CAS2_BOVIN|(Common contaminant protein)	11	NaN	NaN	1	11	11
869	>sp|TRFL_HUMAN|(Common contaminant protein)	10	9	5	1	10	24
870	>Reverse >tr|A0A0D9QVP6|A0A0D9QVP6_CHLSB Uncharacterized protein OS=Chlorocebus sabaeus GN=TBC1D15 PE=4 SV=1	NaN	9	NaN	1	9	9
871	>Reverse >tr|A0A0D9RMN6|A0A0D9RMN6_CHLSB Kinesin-like protein (Fragment) OS=Chlorocebus sabaeus GN=KIF3A PE=3 SV=1	NaN	9	NaN	1	9	9
872	>Reverse >tr|A0A0D9QVI1|A0A0D9QVI1_CHLSB Uncharacterized protein OS=Chlorocebus sabaeus GN=PGM2L1 PE=4 SV=1	NaN	8	NaN	1	8	8
873	>Reverse >tr|A0A0D9QZI5|A0A0D9QZI5_CHLSB Uncharacterized protein OS=Chlorocebus sabaeus GN=NOLC1 PE=4 SV=1	8	NaN	NaN	1	8	8
874	>Reverse >tr|A0A0D9R0K2|A0A0D9R0K2_CHLSB Uncharacterized protein OS=Chlorocebus sabaeus GN=TRIM37 PE=4 SV=1	7	3	3	1	7	13
875	>Reverse >tr|A0A0D9RRT0|A0A0D9RRT0_CHLSB Uncharacterized protein OS=Chlorocebus sabaeus GN=KCNG1 PE=4 SV=1	NaN	NaN	7	1	7	7
876	>Reverse >tr|A0A0D9RCW6|A0A0D9RCW6_CHLSB Uncharacterized protein OS=Chlorocebus sabaeus GN=KIAA1671 PE=4 SV=1	6	NaN	NaN	1	6	6
877	>sp|CASK_BOVIN|(Common contaminant protein)	6	NaN	NaN	1	6	6
878	>Reverse >tr|A0A0D9RNU4|A0A0D9RNU4_CHLSB Uncharacterized protein OS=Chlorocebus sabaeus GN=MLH1 PE=4 SV=1	NaN	5	NaN	1	5	5
879	>gi|1373325|gb|AAB08064.1| Enhanced Green Fluorescent Protein [Cloning vector pEGFP-N3](Common contaminant protein)	4	NaN	NaN	1	4	4
880	>sp|CASB_BOVIN|(Common contaminant protein)	4	NaN	NaN	1	4	4
881	>sp|GSTP1_HUMAN|(Common contaminant protein)	NaN	NaN	4	1	4	4
882	>sp|K1M1_SHEEP|(Common contaminant protein)	4	NaN	NaN	1	4	4
883	>Reverse >tr|A0A0D9QVZ4|A0A0D9QVZ4_CHLSB Uncharacterized protein OS=Chlorocebus sabaeus GN=FOLR1 PE=4 SV=1	NaN	NaN	3	1	3	3
884	>Reverse >tr|A0A0D9R2I1|A0A0D9R2I1_CHLSB Uncharacterized protein OS=Chlorocebus sabaeus GN=EXOC6 PE=4 SV=1	NaN	3	NaN	1	3	3
885	>Reverse >tr|A0A0D9R6P9|A0A0D9R6P9_CHLSB Uncharacterized protein OS=Chlorocebus sabaeus GN=TRIM7 PE=4 SV=1	3	NaN	NaN	1	3	3
886	>Reverse >tr|A0A0D9RD57|A0A0D9RD57_CHLSB Uncharacterized protein (Fragment) OS=Chlorocebus sabaeus GN=CADPS2 PE=4 SV=1	2	NaN	NaN	1	2	2
887	>Reverse >tr|A0A0D9QWT2|A0A0D9QWT2_CHLSB Uncharacterized protein OS=Chlorocebus sabaeus GN=FANK1 PE=4 SV=1	NaN	1	NaN	1	1	1
888	>Reverse >tr|A0A0D9S520|A0A0D9S520_CHLSB Uncharacterized protein (Fragment) OS=Chlorocebus sabaeus GN=ARL6IP4 PE=4 SV=1	1	NaN	NaN	1	1	1
